# Supplementary material for: Chronostratigraphic ranges of Early–Middle Miocene larger benthic foraminifera calibrated by planktonic foraminiferal assemblages (Sierra de Marmolance, Granada, SE Spain)
Source: Copernicus journal article supplement (doi:10.5194/jm-44-573-2025), 2025-11-25
Supplement: Supplementary file 1 [file Supplements_explanation.docx]

*Supplement of*

**Chronostratigraphic ranges of Early**–**Middle Miocene larger benthic foraminifera calibrated by planktonic foraminiferal assemblages (Sierra de Marmolance, Granada, SE Spain)**

**Bolivar-Feriche et al.**

Correspondence to: Davide Bassi (bsd@unife.it)

• Supplements

– ANOVA-clomp cluster (png)

– Marmolance_Cluster-Bray-Curtis (cluster analysis with distinguished facies; jpeg)

– Table S1. All-components_suppl data (pdf)

– Table S2. Data statistics.xlsx
