# Supplementary material for: Chronostratigraphic ranges of Early–Middle Miocene larger benthic foraminifera calibrated by planktonic foraminiferal assemblages (Sierra de Marmolance, Granada, SE Spain)
Source: Copernicus journal article supplement (doi:10.5194/jm-44-573-2025), 2025-11-25
Supplement: Supplementary file 1 [file Table S1_all-components_suppl data.pdf › Table S1_all-components_suppl data.pdf]

| Microfacies | r. a. (%) | Larger Benthic Foraminifera |                      |                     |                   |                        |                     |                   |                    |                       |                |                   |                |                   |                      |                       | Smaller benthic foraminifera |                  |                     | Corallines |                    | Other components |        |             |           |          |             |           |           |        |      | Planktonics |
|-------------|-----------|-----------------------------|----------------------|---------------------|-------------------|------------------------|---------------------|-------------------|--------------------|-----------------------|----------------|-------------------|----------------|-------------------|----------------------|-----------------------|------------------------------|------------------|---------------------|------------|--------------------|------------------|--------|-------------|-----------|----------|-------------|-----------|-----------|--------|------|-------------|
|             |           | <i>Nummulites</i>           | <i>Heterostegina</i> | <i>Spiroclypeus</i> | <i>Operculina</i> | <i>Lepidocyclinids</i> | <i>Amphistegina</i> | <i>Neorotalia</i> | <i>Risananeiza</i> | <i>Austrotrillina</i> | <i>Borelis</i> | <i>Peneroplis</i> | <i>Sorites</i> | <i>Acervulina</i> | <i>Victoriellids</i> | <i>Planorbulinids</i> | <i>Rotaliids</i>             | <i>Miliolids</i> | <i>Textulariids</i> | CA         | <i>Geniculates</i> | CCA              | Corals | Echinoderms | Bryozoans | Bivalves | Brachiopods | Barnacles | Serpulids | Quartz |      |             |
| MF1         | Min.      | 1,4                         | 0,0                  | 0,0                 | 0,0               | 0,0                    | 0,0                 | 0,0               | 0,0                | 0,0                   | 0,0            | 0,0               | 0,0            | 0,0               | 0,0                  | 0,0                   | 0,0                          | 0,0              | 0,0                 | 0,0        | 17,4               | 0,0              | 0,0    | 0,0         | 0,0       | 0,0      | 0,0         | 0,0       | 0,0       | 0,0    | 0,0  |             |
|             | Max.      | 31,2                        | 4,0                  | 0,0                 | 1,4               | 1,6                    | 6,9                 | 10,3              | 0,0                | 0,0                   | 1,5            | 0,7               | 0,0            | 3,0               | 6,7                  | 0,4                   | 4,1                          | 3,1              | 0,8                 | 3,9        | 78,6               | 65,0             | 17,9   | 23,4        | 3,5       | 1,7      | 0,8         | 10,6      | 0,0       | 0,0    | 2,6  |             |
|             | Mean      | 10,4                        | 0,4                  | 0,0                 | 0,1               | 0,0                    | 1,9                 | 2,3               | 0,0                | 0,0                   | 0,1            | 0,0               | 0,0            | 0,2               | 1,1                  | 0,0                   | 0,2                          | 0,4              | 0,1                 | 0,9        | 44,2               | 22,9             | 5,9    | 7,5         | 0,3       | 0,1      | 0,0         | 0,9       | 0,0       | 0,0    | 0,2  |             |
| MF2         | Min.      | 0,0                         | 0,0                  | 0,0                 | 0,0               | 0,0                    | 0,0                 | 0,0               | 0,0                | 0,0                   | 0,0            | 0,0               | 0,0            | 0,0               | 0,0                  | 0,0                   | 0,0                          | 0,0              | 0,0                 | 0,0        | 0,0                | 0,0              | 3,9    | 0,0         | 0,0       | 0,0      | 0,0         | 0,0       | 0,0       | 0,0    | 26,9 |             |
|             | Max.      | 3,9                         | 0,0                  | 0,0                 | 2,4               | 0,0                    | 7,3                 | 2,4               | 0,0                | 0,0                   | 0,0            | 0,0               | 0,0            | 0,6               | 3,7                  | 0,0                   | 3,3                          | 1,2              | 0,8                 | 3,1        | 52,0               | 2,4              | 13,0   | 13,3        | 0,0       | 0,0      | 0,0         | 0,0       | 1,2       | 0,0    | 87,0 |             |
|             | Mean      | 1,8                         | 0,0                  | 0,0                 | 0,4               | 0,0                    | 1,5                 | 0,9               | 0,0                | 0,0                   | 0,0            | 0,0               | 0,0            | 0,1               | 1,1                  | 0,0                   | 1,5                          | 0,2              | 0,1                 | 1,2        | 30,8               | 0,4              | 7,9    | 3,4         | 0,0       | 0,0      | 0,0         | 0,0       | 0,2       | 0,0    | 48,5 |             |
| MF3         | Min.      | 0,0                         | 0,0                  | 0,0                 | 0,0               | 0,0                    | 0,0                 | 1,4               | 0,0                | 0,0                   | 0,0            | 0,0               | 0,0            | 0,0               | 0,0                  | 0,0                   | 0,0                          | 0,0              | 0,0                 | 0,0        | 18,8               | 0,0              | 0,0    | 0,0         | 0,0       | 0,0      | 0,0         | 0,0       | 0,0       | 0,0    | 0,0  |             |
|             | Max.      | 2,8                         | 2,8                  | 0,0                 | 2,9               | 4,8                    | 12,5                | 52,5              | 6,6                | 1,1                   | 1,1            | 1,1               | 0,0            | 0,0               | 9,4                  | 2,9                   | 7,4                          | 10,7             | 1,5                 | 5,5        | 67,7               | 61,1             | 29,1   | 16,6        | 0,5       | 0,0      | 0,0         | 5,7       | 3,8       | 2,2    |      |             |
|             | Mean      | 0,3                         | 0,3                  | 0,0                 | 0,2               | 0,7                    | 1,8                 | 19,0              | 0,6                | 0,1                   | 0,1            | 0,1               | 0,0            | 0,0               | 1,1                  | 0,3                   | 1,9                          | 1,4              | 0,4                 | 1,0        | 43,9               | 9,8              | 11,7   | 4,1         | 0,0       | 0,0      | 0,0         | 0,0       | 0,6       | 0,5    | 0,1  |             |
| MF4         | Min.      | 0,0                         | 0,0                  | 0,0                 | 0,0               | 1,5                    | 0,0                 | 0,0               | 0,0                | 0,0                   | 0,0            | 0,0               | 0,0            | 0,0               | 0,0                  | 0,0                   | 0,0                          | 0,0              | 0,0                 | 0,0        | 27,5               | 0,0              | 0,0    | 0,0         | 0,0       | 0,0      | 0,0         | 0,0       | 0,0       | 0,0    | 0,0  |             |
|             | Max.      | 4,8                         | 1,5                  | 0,0                 | 21,5              | 38,0                   | 9,2                 | 19,0              | 3,4                | 0,8                   | 0,7            | 1,3               | 0,0            | 0,0               | 7,5                  | 2,0                   | 11,1                         | 5,9              | 3,8                 | 5,3        | 91,5               | 13,5             | 27,8   | 10,0        | 5,1       | 0,0      | 0,0         | 0,7       | 10,6      | 5,5    |      |             |
|             | Mean      | 0,7                         | 0,1                  | 0,0                 | 4,9               | 12,7                   | 4,2                 | 6,6               | 0,1                | 0,0                   | 0,0            | 0,1               | 0,0            | 0,0               | 0,6                  | 0,1                   | 2,0                          | 0,4              | 0,3                 | 0,3        | 51,5               | 1,1              | 8,3    | 2,5         | 0,3       | 0,0      | 0,0         | 0,1       | 2,9       | 0,3    |      |             |
| MF5         | Min.      | 0,0                         | 0,0                  | 0,0                 | 0,0               | 0,0                    | 0,0                 | 0,0               | 2,5                | 0,0                   | 0,0            | 0,0               | 0,0            | 0,0               | 0,0                  | 0,0                   | 0,0                          | 0,0              | 0,0                 | 0,0        | 24,3               | 0,0              | 0,0    | 0,0         | 0,0       | 0,0      | 0,0         | 0,0       | 0,0       | 0,0    | 0,0  |             |
|             | Max.      | 0,0                         | 5,1                  | 3,7                 | 1,8               | 10,1                   | 2,9                 | 7,7               | 22,5               | 1,8                   | 1,5            | 1,0               | 2,1            | 0,0               | 3,1                  | 1,8                   | 4,5                          | 7,2              | 1,0                 | 5,1        | 76,1               | 27,7             | 35,5   | 23,1        | 2,5       | 2,1      | 6,3         | 11,0      | 20,5      | 1,8    |      |             |
|             | Mean      | 0,0                         | 1,6                  | 0,3                 | 0,3               | 2,5                    | 1,0                 | 3,0               | 8,0                | 0,5                   | 0,1            | 0,2               | 0,2            | 0,0               | 0,2                  | 0,5                   | 1,1                          | 3,0              | 0,1                 | 1,3        | 46,1               | 8,3              | 10,0   | 5,5         | 0,9       | 0,2      | 0,5         | 1,0       | 3,4       | 0,2    |      |             |
| MF6         | Min.      | 0,0                         | 0,0                  | 0,0                 | 0,0               | 0,0                    | 0,8                 | 0,0               | 0,0                | 0,0                   | 0,0            | 0,0               | 0,0            | 0,5               | 0,0                  | 0,0                   | 0,8                          | 0,0              | 0,0                 | 0,4        | 36,2               | 0,0              | 1,3    | 0,4         | 0,0       | 0,0      | 0,0         | 0,5       | 3,4       | 0,0    |      |             |
|             | Max.      | 0,0                         | 0,0                  | 0,0                 | 0,0               | 0,0                    | 2,6                 | 0,0               | 0,0                | 0,0                   | 0,0            | 0,0               | 0,0            | 7,6               | 0,0                  | 0,0                   | 3,0                          | 0,5              | 1,3                 | 1,0        | 82,2               | 0,0              | 4,6    | 2,6         | 4,6       | 0,0      | 9,5         | 1,7       | 38,2      | 2,0    |      |             |
|             | Mean      | 0,0                         | 0,0                  | 0,0                 | 0,0               | 0,0                    | 1,5                 | 0,0               | 0,0                | 0,0                   | 0,0            | 0,0               | 0,0            | 3,4               | 0,0                  | 0,0                   | 2,1                          | 0,2              | 0,6                 | 0,6        | 57,3               | 0,0              | 3,5    | 1,2         | 2,2       | 0,0      | 3,5         | 1,2       | 21,4      | 1,2    |      |             |
