# Supplementary material for: Chronostratigraphic ranges of Early–Middle Miocene larger benthic foraminifera calibrated by planktonic foraminiferal assemblages (Sierra de Marmolance, Granada, SE Spain)
Source: Copernicus journal article supplement (doi:10.5194/jm-44-573-2025), 2025-11-25
Supplement: Supplementary file 2 [file Table S2_DATA-STATISTICS.xlsx]

## Sheet: POINT-COUNTING
	proporcion relativa de los componentes presentes en cada muestra tras el point-counting analisis
		CA Geniculates	CCA	matrix	cement	voids	terrigenous	corals	bivalves	brachiopods	balanids /barnacles	echinoderms	bryozoans	serpulids	austrotrillina	borelis	peneroplis	sorites	Archaias	lepidocyclinids	amphistegina	neorotalia	risananeiza	nummulites	operculina	heterostegina	spiroclypeus	sphaerogypsina	acervulina	chapmanina	carpenteria/victoriella	planorbulina/planorbulinella	haddonia	lituolids	undetermined encrusting forams	undetermined miliolids	undetermined textulariids	undetermined nummulitids	smaller benthics	planktonic foraminifera	unidentified bioclast	discocyclina
	M1S1'	0	0.22	0.456667	0.03	0.05	0	0.0266667	0.00666667	0	0.00333333	0.0133333	0.02	0	0	0	0	0		0	0.0133333	0	0	0.103333	0	0	0	0	0	0	0.01	0	0	0.0266667	0.00333333	0.0133333	0.00333333	0	0	0	0	0
	M1S2	0	0.14	0.453333	0.04	0.01	0	0.283333	0	0	0	0	0.00333333	0	0	0	0	0		0	0	0	0	0.00666667	0	0	0	0	0	0	0	0	0	0	0.0566667	0	0	0	0.00333333	0	0.00333333	0
	M1S3	0.00666667	0.316667	0.306667	0.0433333	0	0	0.0166667	0.00666667	0	0	0.05	0.0333333	0	0	0	0	0		0	0.0233333	0.02	0	0.106667	0	0.00333333	0	0	0	0	0.01	0	0	0	0.00666667	0	0	0.0133333	0	0.0133333	0.0233333	0
	M1S4	0	0.31	0.166667	0.07	0.00333333	0	0.313333	0	0	0	0.0366667	0.0233333	0	0	0	0	0		0	0.00666667	0.00333333	0	0.0433333	0	0	0	0	0	0	0	0.00333333	0	0	0.00333333	0.00333333	0	0	0	0	0.0133333	0
	M1S5 I	0.00333333	0.176667	0.383333	0.03	0.0133333	0	0.253333	0.00333333	0	0	0.0133333	0.00666667	0	0	0	0	0		0	0.0133333	0.00666667	0	0.08	0	0.00333333	0	0	0	0	0.00333333	0	0	0	0.01	0	0	0	0	0	0	0
	M1S6	0.00333333	0.303333	0.37	0.02	0.00666667	0	0.07	0.00333333	0	0	0.0166667	0.0266667	0	0	0	0	0		0	0	0.0166667	0	0.0733333	0.00333333	0.00333333	0	0	0	0	0.03	0	0	0	0.00333333	0	0.00333333	0	0	0.00666667	0.04	0
	M1S7	0	0.213333	0.45	0.113333	0	0	0	0	0	0	0.0333333	0	0	0	0	0	0		0	0.00333333	0	0	0	0	0	0	0	0	0	0	0	0	0	0	0	0	0	0.0133333	0.146667	0.0266667	0
	M1S10	0	0.243333	0.49	0.0133333	0.0166667	0.00666667	0.04	0	0	0	0.00666667	0.03	0.00333333	0	0.00333333	0	0		0	0.0166667	0.0766667	0	0.0133333	0	0.0133333	0	0	0	0	0	0	0	0	0	0.00333333	0	0	0.0233333	0	0	0
	M1S11	0	0.223333	0.383333	0.0433333	0.00666667	0	0.09	0.00333333	0	0	0.03	0.0366667	0.00333333	0	0	0	0		0	0.0166667	0.0166667	0	0.1	0	0.00333333	0	0	0	0	0	0	0	0	0.00333333	0.00666667	0	0	0	0	0.0333333	0
	M1S14	0	0.1	0.53	0.00666667	0.04	0.02	0	0.00333333	0	0	0.00333333	0.03	0	0	0	0	0		0.116667	0.00333333	0	0	0	0.0566667	0	0	0	0	0	0	0	0	0	0	0	0.01	0	0	0.02	0.06	0
	M1S15b	0	0.18	0.573333	0.0266667	0.05	0.02	0.03	0.00333333	0	0	0.0233333	0.01	0	0	0	0	0		0.0166667	0	0	0	0.0166667	0.0133333	0.00333333	0	0	0	0	0	0	0	0	0	0	0	0	0.03	0.00333333	0	0
	M1S16a	0	0.19	0.49	0.0133333	0.0166667	0.0466667	0	0	0	0	0.02	0.0166667	0	0	0	0	0		0.0633333	0.0233333	0.03	0	0.00666667	0.0333333	0	0	0	0	0	0.00333333	0	0	0	0	0	0	0	0	0.00666667	0.04	0
	M1S16b	0	0.196667	0.46	0.0266667	0.00333333	0.0433333	0	0	0	0	0.0133333	0.02	0.00333333	0	0	0	0		0.0566667	0.0166667	0.08	0	0.00333333	0.0166667	0	0	0	0	0	0.00333333	0	0	0	0	0	0	0	0.0566667	0	0	0
	M2S1	0	0.256667	0.483333	0.0166667	0.0266667	0.0233333	0	0	0	0	0.01	0	0	0	0	0	0		0.0433333	0.0433333	0.0533333	0	0	0.0133333	0	0	0	0	0	0	0	0	0	0	0	0	0	0.03	0	0	0
	M2S2I	0	0.196667	0.57	0.0166667	0.01	0.0266667	0	0	0	0	0.00666667	0.00333333	0	0	0	0	0		0.0333333	0.0166667	0.0766667	0	0	0.02	0	0	0	0	0	0	0	0	0	0	0	0	0	0.0233333	0	0	0
	M2S3	0	0.203333	0.486667	0.01	0.03	0.0133333	0	0.00333333	0	0	0.02	0.00666667	0	0	0	0	0		0.05	0.04	0.0166667	0	0	0.0966667	0	0	0	0	0	0	0	0	0	0	0	0	0	0	0	0.0233333	0
	M2S10	0	0.213333	0.466667	0.00333333	0.0133333	0.01	0	0	0	0	0.0233333	0.0266667	0	0	0	0	0		0.05	0.04	0.0366667	0	0.00333333	0.0966667	0	0	0	0	0	0	0	0	0	0	0	0	0	0.0166667	0	0	0
	M2S12B	0	0.35	0.393333	0.0233333	0.00666667	0.0133333	0.00666667	0	0	0	0.03	0.00666667	0	0	0	0	0		0.06	0.0333333	0.04	0	0	0.0133333	0	0	0	0	0	0	0.00333333	0	0	0	0	0	0	0.02	0	0	0
	M2S12C	0	0.35	0.466667	0.0133333	0.0133333	0	0	0	0	0	0.0166667	0.05	0	0	0	0	0		0.0533333	0	0.0233333	0	0	0.00333333	0	0	0	0	0	0	0	0	0.00333333	0.00333333	0	0	0	0.00333333	0	0	0
	M2S13	0	0.38	0.29	0.0333333	0.00666667	0.00666667	0	0	0	0	0.01	0.02	0	0	0	0	0		0.15	0.0166667	0.05	0	0	0.0266667	0	0	0	0	0	0.01	0	0	0	0	0	0	0	0	0	0	0
	M3S2	0.00333333	0.33	0.226667	0.19	0.02	0	0	0	0	0	0.0666667	0.0266667	0	0	0.00333333	0	0		0	0.00333333	0.0333333	0	0	0	0	0	0	0	0	0.00333333	0	0	0	0.00333333	0.06	0.00333333	0	0.0266667	0	0	0
	M3S3	0.00333333	0.2	0.31	0.173333	0.01	0.0166667	0	0	0	0	0.06	0.00666667	0	0	0.00333333	0.00666667	0		0.0233333	0.0366667	0.06	0	0	0.01	0	0	0	0	0	0.02	0.01	0	0	0	0.03	0.00333333	0	0.0166667	0	0	0
	M3S4	0.00333333	0.226667	0.313333	0.103333	0.0166667	0	0	0	0	0	0.13	0.0166667	0	0	0	0	0		0	0.00333333	0.0633333	0	0	0.0166667	0	0	0	0	0	0.0533333	0.0166667	0	0	0	0	0.00333333	0	0.0333333	0	0	0
	M3S5	0.00333333	0.106667	0.353333	0.186667	0.01	0.00333333	0	0	0	0	0.0433333	0.00333333	0	0	0	0	0		0	0.01	0.196667	0	0	0.00333333	0	0	0	0	0	0.0166667	0.00666667	0	0	0	0.0166667	0.00666667	0	0.0333333	0	0	0
	M3S6	0.0233333	0.163333	0.496667	0.0533333	0.00666667	0.0233333	0	0	0	0	0.0533333	0	0	0.00333333	0	0	0		0.00666667	0.01	0.0566667	0	0	0.02	0	0	0	0	0	0.0333333	0	0	0	0	0.0133333	0.0166667	0	0.02	0	0	0
	M3S10	0	0.163333	0.233333	0.12	0.0133333	0	0.36	0	0	0	0.00333333	0	0	0.00333333	0	0.00666667	0		0.00333333	0	0	0	0	0	0	0	0.00333333	0	0	0.0133333	0	0	0	0	0.03	0.00333333	0	0.0133333	0	0.03	0
	M3S11	0	0.03	0.0466667	0.02	0.00666667	0	0.896667	0	0	0	0	0	0	0	0	0	0		0	0	0	0	0	0	0	0	0	0	0	0	0	0	0	0	0	0	0	0	0	0	0
	M3S12	0	0.293333	0.27	0.25	0.0166667	0.0166667	0.106667	0	0	0	0.00333333	0.00666667	0.00666667	0	0	0	0		0	0	0.00666667	0	0	0	0	0	0	0	0	0	0	0	0	0	0.00333333	0.00666667	0	0	0	0.0133333	0
	M3S13	0.00333333	0.193333	0.44	0.03	0	0	0.0666667	0	0	0	0.0566667	0.0166667	0.00333333	0	0	0	0		0.02	0.02	0.0533333	0.0166667	0	0.0233333	0.00666667	0	0	0	0	0	0	0	0	0	0.00333333	0	0	0.01	0	0.0366667	0
	M3S14-I	0	0.0633333	0.09	0	0	0	0.836667	0	0	0	0	0	0	0	0	0	0		0	0	0	0	0	0	0	0	0	0	0	0	0	0	0	0	0	0	0	0	0	0.01	0
	M3S15	0	0.163333	0.203333	0.436667	0.02	0	0.07	0	0	0	0	0	0	0.00333333	0.00333333	0.00333333	0		0	0.00666667	0.0466667	0	0	0	0	0	0	0	0	0.00666667	0	0	0	0.0166667	0.01	0	0	0	0	0.01	0
	M3S16	0.00666667	0.116667	0.363333	0.276667	0.0133333	0	0.0633333	0	0.00333333	0	0.00666667	0.00666667	0	0	0	0.00333333	0.00666667		0.00666667	0.00666667	0.02	0.0233333	0	0	0.00333333	0	0	0	0	0.01	0.00333333	0	0	0	0.0233333	0	0	0.0133333	0	0.0233333	0
	M3S17	0.00333333	0.0233333	0.0833333	0.0633333	0	0	0.796667	0	0	0	0.00666667	0	0	0	0	0	0		0	0	0	0	0	0	0	0	0	0	0	0.00666667	0.00333333	0	0	0	0.00333333	0.00333333	0	0.00333333	0	0.00333333	0
	M3S18	0.00666667	0.16	0.27	0.293333	0.03	0.00333333	0.0466667	0	0	0	0.0133333	0.0266667	0.00666667	0.00333333	0	0	0		0.0166667	0.00333333	0.0133333	0.0133333	0	0.00333333	0.00666667	0	0	0	0	0	0.00333333	0	0	0	0.0233333	0.00333333	0.00666667	0.0133333	0	0.0333333	0
	M4S1	0.01	0.14	0.433333	0.0933333	0.0233333	0	0.226667	0.01	0	0	0.0233333	0	0	0	0.00333333	0	0		0	0.01	0	0	0	0	0	0	0	0	0	0	0	0	0	0.00333333	0.01	0	0	0	0.00333333	0.01	0
	M4S3	0.0166667	0.09	0.346667	0.2	0	0	0.00333333	0.00333333	0	0.0233333	0.0333333	0.01	0	0.00333333	0	0	0		0.01	0.01	0.0233333	0.0833333	0	0.00666667	0	0	0	0	0	0	0.00666667	0	0	0	0.0233333	0	0	0.0166667	0.00666667	0.0833333	0
	M4S7	0.01	0.3	0.153333	0.14	0.0133333	0	0	0	0	0	0.12	0.00666667	0	0	0	0	0		0.00333333	0.00666667	0.193333	0	0	0	0	0	0	0	0	0	0	0	0	0	0.0166667	0.00666667	0	0.00666667	0	0.0233333	0
	M4S8	0.00333333	0.276667	0.273333	0.103333	0.0233333	0	0	0	0	0	0.113333	0.0366667	0	0	0	0	0		0	0.00333333	0.12	0	0	0	0	0	0	0	0	0	0.00333333	0	0	0	0.00333333	0	0	0.0133333	0	0.0266667	0
	M4S9	0.00666667	0.19	0.223333	0.07	0	0	0	0	0	0	0.193333	0.0266667	0	0.00333333	0	0	0		0.02	0.0133333	0.173333	0	0	0	0.0133333	0	0	0	0	0.00666667	0	0	0	0	0	0	0	0.0166667	0	0.0433333	0
	M4S10	0.00666667	0.246667	0.19	0.176667	0.01	0	0.05	0	0	0	0.01	0.0166667	0.01	0.00666667	0	0	0.00666667		0.01	0.0133333	0.0566667	0.0566667	0	0.01	0.01	0	0	0	0	0	0	0	0	0.00333333	0.06	0.00333333	0.00666667	0.0166667	0.00333333	0.02	0
	M4S11	0.0233333	0.0633333	0.266667	0.08	0	0.00333333	0.36	0.0166667	0	0	0.03	0.0266667	0	0.00666667	0	0.00333333	0		0.00333333	0.00333333	0.02	0.0166667	0	0	0	0	0	0	0	0.01	0	0	0	0	0.0266667	0.0133333	0	0.00666667	0.00666667	0.0133333	0
	M4S14	0.0133333	0.146667	0.41	0.0933333	0.00666667	0	0	0.00333333	0	0	0.0433333	0.0666667	0.00666667	0	0	0	0		0.0833333	0.0133333	0	0.03	0	0.00666667	0.0133333	0	0	0	0	0	0.00333333	0	0	0	0.00666667	0.0133333	0.00666667	0	0.00666667	0.0266667	0
	M4S14-II	0.02	0.16	0.336667	0.0633333	0.00333333	0	0	0.00333333	0.00333333	0	0.0433333	0.08	0.0133333	0	0	0.00333333	0		0.103333	0.0133333	0.0133333	0.0533333	0	0.00333333	0.00333333	0	0	0	0	0	0	0	0	0	0	0	0.00333333	0.00666667	0.0166667	0.0533333	0
	M4S15	0.00664452	0.20598	0.548173	0.0332226	0.013289	0	0.0398671	0.013289	0	0	0.00332226	0.0332226	0	0	0	0	0		0.0299003	0.0166113	0	0.00664452	0	0	0.00332226	0	0	0	0	0	0	0	0	0	0	0	0.00332226	0.00332226	0.00996678	0.0299003	0
	M4S16	0.00666667	0.19	0.373333	0.273333	0.01	0	0.00333333	0	0	0	0.00666667	0.0266667	0	0	0	0	0		0	0.00333333	0.00333333	0	0.0266667	0	0	0	0	0	0	0	0	0	0	0	0.01	0	0.0333333	0.00666667	0.00333333	0.0233333	0
	M4S17	0.00666667	0.196667	0.196667	0.4	0.01	0.00333333	0	0.00333333	0	0	0.0466667	0.00333333	0	0.00333333	0	0.00333333	0		0	0	0	0.02	0	0	0.01	0	0	0	0	0	0.00333333	0.00333333	0	0	0.02	0.00333333	0.01	0	0	0.0566667	0
	M5S2	0	0.36	0.34	0.146667	0	0.01	0.0233333	0.00333333	0.01	0	0	0.00666667	0	0	0	0	0		0.01	0	0	0.0333333	0	0	0	0	0	0	0	0	0	0	0	0	0.01	0	0	0.00666667	0	0.04	0
	M5S3	0	0.103333	0.533333	0.01	0	0.0233333	0	0.01	0	0	0.143333	0.0933333	0	0	0	0	0		0.00333333	0.00666667	0.00666667	0.01	0	0.00333333	0	0	0	0	0	0	0	0	0	0	0	0	0.0233333	0	0	0.03	0
	M5S4a	0	0.206667	0.283333	0.22	0	0.0166667	0	0.00333333	0	0	0.0266667	0.0766667	0.00333333	0	0	0	0		0.0466667	0.0133333	0.02	0.0433333	0	0	0.00333333	0	0	0	0	0	0	0	0	0	0.00333333	0	0.02	0	0	0.0133333	0
	M5S4b	0	0.166667	0.623333	0.02	0	0.02	0	0.00666667	0	0	0.02	0.0366667	0	0	0	0	0		0.0333333	0.00333333	0	0.0333333	0	0	0.00333333	0	0	0	0	0	0	0	0	0	0.0133333	0	0.01	0	0.00333333	0.00666667	0
	M5S5	0	0.19	0.256667	0.286667	0.0166667	0.0166667	0	0	0	0	0.0466667	0.00666667	0	0	0	0	0		0	0.00333333	0.136667	0.0233333	0	0	0.00333333	0	0	0	0	0	0	0	0	0	0.00666667	0	0.00333333	0	0	0.00333333	0
	M5S6	0.00666667	0.16	0.18	0.166667	0.01	0.00333333	0	0.00333333	0	0	0.04	0.00333333	0.01	0	0	0	0		0	0.01	0.32	0.04	0	0	0.00333333	0	0	0	0	0	0.00333333	0	0	0	0.00333333	0.00333333	0.0233333	0	0	0.01	0
	M5S7	0	0.173333	0.183333	0.346667	0	0.00666667	0.126667	0	0	0	0.06	0.0266667	0	0	0	0	0		0	0	0	0.0333333	0	0	0.0233333	0	0	0	0	0	0	0	0	0	0.00666667	0	0.00666667	0	0	0.00666667	0
	M5S8	0	0.186047	0.146179	0.478405	0	0.00996678	0.0365449	0.00664452	0	0	0.0465116	0	0	0.00664452	0	0	0		0	0.00332226	0.00664452	0.0199336	0	0	0.0166113	0.013289	0	0	0	0	0	0	0	0.00332226	0.00996678	0	0.00332226	0	0	0.00664452	0
	M5S10	0	0.276667	0.223333	0.29	0	0	0.06	0.00333333	0	0	0.05	0	0.0533333	0.00666667	0	0	0		0	0.00333333	0.0133333	0.0133333	0	0	0	0	0	0	0	0	0	0	0	0	0.00333333	0	0	0	0	0.00333333	0
	M5S11	0.00333333	0.236667	0.123333	0.413333	0.00333333	0	0.09	0.00333333	0	0	0.0333333	0	0	0	0.00666667	0.00333333	0		0	0	0.0233333	0.0366667	0	0	0.0166667	0	0	0	0	0	0	0	0	0	0	0	0	0	0	0.00666667	0
	M5S12	0.0133333	0.103333	0.436667	0.296667	0	0.0533333	0	0.00333333	0	0	0.0266667	0.00333333	0	0	0	0	0		0	0	0.02	0.03	0	0	0	0	0	0	0	0	0.00333333	0	0	0	0.00333333	0	0	0	0	0.00666667	0
	M5S14	0.00666667	0.24	0.246667	0.0366667	0	0.253333	0	0.0133333	0	0.0633333	0.03	0.00333333	0.00333333	0	0	0	0		0	0.00666667	0	0	0	0	0	0	0	0.00333333	0	0	0	0	0	0	0.00333333	0.00333333	0.00333333	0.02	0.0133333	0.05	0
	M5S14bis	0.00333333	0.646667	0.126667	0.0433333	0.00333333	0.0266667	0	0	0	0	0.01	0.00333333	0.0133333	0	0	0	0		0	0.00666667	0	0	0	0	0	0	0	0.06	0	0	0	0	0	0	0	0.01	0	0.00666667	0	0.04	0
	M5S15	0.00333333	0.346667	0.263333	0.0166667	0.0166667	0.146667	0	0.03	0	0.00666667	0.03	0.0166667	0.01	0	0	0	0		0	0.0166667	0	0	0	0	0	0	0	0.0133333	0	0	0	0	0	0	0	0	0.01	0.0166667	0.01	0.0466667	0
	M6S1	0	0.163333	0.55	0.04	0.0633333	0	0.0333333	0	0	0	0.0333333	0.0433333	0	0	0	0	0		0	0.0166667	0	0	0.0533333	0	0	0	0	0	0	0	0	0	0	0	0	0	0.00333333	0	0	0	0
	M6S2	0	0	0.673333	0	0.146667	0	0	0	0	0	0.0233333	0	0	0	0	0	0		0	0	0	0	0	0	0	0	0	0	0	0	0	0	0	0	0	0	0	0	0.156667	0	0
	M6S3	0.0333333	0.416667	0.233333	0.0233333	0.0166667	0	0	0	0	0	0.123333	0.09	0	0	0	0	0		0	0.00666667	0.0266667	0	0.01	0	0	0	0	0	0	0.00666667	0	0	0	0	0	0	0	0	0	0.0133333	0
	M6S4	0	0.116667	0.55	0.0433333	0.01	0	0.24	0	0	0	0.00666667	0.0166667	0	0	0	0	0		0	0	0	0	0	0	0	0	0	0	0	0	0	0	0	0.01	0.00333333	0	0	0	0	0.00333333	0
	M6S5	0	0.16	0.05	0.0866667	0.00333333	0	0.486667	0	0	0	0.0766667	0.03	0	0	0	0	0		0	0	0.0866667	0	0	0	0	0	0	0	0	0	0.00333333	0	0	0	0.01	0	0	0	0	0.00666667	0
	M6S6	0.0133333	0.246667	0.336667	0.0333333	0	0	0.123333	0	0	0	0.0533333	0.0666667	0	0	0	0	0		0.01	0.01	0.0266667	0	0.03	0	0	0	0	0	0	0.0366667	0	0	0	0.00333333	0	0	0.00333333	0	0	0.00666667	0
	M6S7	0	0.243333	0.373333	0.00666667	0.02	0	0.216667	0	0	0	0.0233333	0.03	0	0	0	0	0		0	0.00333333	0.01	0	0.0666667	0	0	0	0	0	0	0	0	0	0	0	0.00333333	0	0.00333333	0	0	0	0
	M6S8	0.00333333	0.253333	0.34	0.0266667	0.00333333	0	0.243333	0	0	0	0.04	0.03	0	0	0	0	0		0	0.00666667	0	0	0.0166667	0	0	0	0	0	0	0.02	0	0	0	0.00333333	0.00333333	0	0.00333333	0	0	0.00666667	0
	M6S9	0.00333333	0.34	0.166667	0.0233333	0.0166667	0	0.0233333	0	0	0	0.106667	0.0533333	0	0	0	0	0		0	0.0266667	0.0666667	0	0.15	0	0	0	0.00333333	0	0	0.01	0	0	0	0	0	0	0	0	0	0.01	0
	M6S10	0	0.506667	0.05	0.0433333	0	0.0166667	0	0	0	0	0.163333	0.01	0	0	0	0.00333333	0		0.0933333	0.0166667	0.0133333	0	0	0.0233333	0	0	0	0	0	0	0	0	0	0	0	0.00333333	0	0.01	0	0.0466667	0
	M6S11	0	0.11	0.35	0.02	0	0	0.496667	0	0	0	0	0.01	0	0	0	0	0		0	0	0.00333333	0	0	0	0	0	0	0	0	0	0	0	0	0.00333333	0	0	0	0	0	0.00666667	0
	M6S12	0.00333333	0.25	0.416667	0.01	0.03	0	0.02	0	0	0	0.09	0.06	0.00333333	0	0	0	0		0	0.00666667	0.02	0	0.0566667	0	0	0	0	0	0	0.0233333	0	0	0	0	0	0	0	0	0	0.01	0
	M6S13	0.00333333	0.273333	0.47	0.0166667	0.00666667	0	0.02	0	0	0	0.0333333	0.0833333	0	0	0	0	0		0	0	0	0	0.0866667	0	0	0	0	0	0	0	0	0	0	0	0.00333333	0	0	0	0	0.00333333	0
	M6S14	0	0.236667	0.43	0.0233333	0.0133333	0	0.0533333	0	0	0	0.0766667	0.0433333	0.04	0	0	0	0		0	0	0.00666667	0	0.0633333	0	0	0	0	0	0	0	0	0	0	0	0	0	0.00333333	0	0	0.01	0
	M6S15	0.0333333	0.22	0.03	0.62	0	0	0.0733333	0	0	0	0.0166667	0	0	0	0	0	0		0	0	0	0	0	0	0	0	0	0	0	0	0	0	0	0	0.00333333	0	0	0.00333333	0	0	0
	M6S16	0.00666667	0.223333	0.37	0.14	0.00333333	0	0.03	0	0	0	0.02	0.00666667	0	0	0	0.00333333	0		0	0.00333333	0.0133333	0	0.146667	0	0	0	0	0	0	0	0	0	0	0	0.00666667	0	0	0	0	0.0166667	0.01
	M6S17	0	0.243333	0.236667	0.216667	0.01	0	0.103333	0	0	0	0.05	0.01	0	0	0	0	0		0	0.0166667	0.0233333	0	0.04	0	0.00666667	0	0	0	0	0.00666667	0	0	0	0.03	0	0	0	0	0	0.00666667	0
	M6S18	0	0.32	0.246667	0.06	0.03	0	0.00333333	0	0	0	0.05	0.06	0.00666667	0	0	0	0		0	0.0133333	0.00666667	0	0.15	0	0.0133333	0	0	0	0	0	0	0	0	0	0.00666667	0	0.01	0.00666667	0	0.0166667	0
	M6S19	0	0.0566667	0.00333333	0.07	0.01	0	0.823333	0	0	0	0.0133333	0	0	0	0	0	0		0	0.00333333	0.00333333	0	0.0133333	0	0	0	0	0	0	0	0	0	0	0	0	0	0	0	0	0.00333333	0
	M6S20	0	0.113333	0.0166667	0.0933333	0.0166667	0	0.723333	0	0	0.01	0	0.01	0	0	0	0	0		0	0	0.0133333	0	0	0	0	0	0	0	0	0	0	0	0	0	0	0	0.00333333	0	0	0	0
	M6S23	0.00333333	0.27	0.236667	0.01	0.0366667	0	0.236667	0	0	0	0.0333333	0	0	0	0.00333333	0	0		0	0.01	0.0166667	0	0.103333	0	0	0	0	0	0	0.00333333	0	0	0	0.02	0	0	0	0	0	0.0166667	0
	M6S24	0	0.196667	0.56	0.0133333	0.03	0	0	0	0	0	0.09	0.0233333	0	0	0	0.00333333	0		0	0.00333333	0.02	0	0.00666667	0	0	0	0	0	0	0.0133333	0	0	0	0	0	0	0.0133333	0.00666667	0	0.02	0
	M6S25	0	0.09	0.643333	0.0233333	0.0333333	0	0.173333	0	0	0	0.01	0.01	0	0	0	0	0		0	0.00333333	0	0	0	0	0	0	0	0	0	0	0	0	0.00333333	0	0	0.00333333	0.00666667	0	0	0	0
	M6S26	0	0.09	0.15	0	0	0	0.736667	0	0	0	0	0	0	0	0	0	0		0	0	0	0	0	0	0	0	0	0	0	0	0	0	0	0.0233333	0	0	0	0	0	0	0
	M6S27	0.0133333	0.246667	0.556667	0.0166667	0.0133333	0	0	0	0	0	0.0233333	0.0166667	0.00333333	0	0	0	0		0	0.0266667	0.02	0	0.0366667	0	0	0	0	0	0	0	0	0	0	0	0	0	0.01	0	0	0.0166667	0
	M6S28	0	0.296667	0.416667	0.01	0.0266667	0	0	0	0	0	0.04	0.0266667	0	0	0.00333333	0	0		0	0	0.04	0	0.08	0	0.01	0	0	0	0	0	0	0	0	0.01	0	0	0.0266667	0	0	0.0133333	0
	M6S30	0	0.616667	0.163333	0.0166667	0.01	0.0366667	0	0.00333333	0	0	0.01	0.00666667	0	0	0	0	0		0.02	0.04	0.0266667	0	0	0	0	0	0	0	0	0	0	0	0	0.00333333	0	0	0	0	0	0.0466667	0
	M7S1	0	0.256667	0.453333	0	0.07	0	0.01	0	0	0	0.01	0	0	0	0	0	0		0	0	0	0	0	0	0	0	0	0	0	0	0	0	0	0	0.00333333	0	0.02	0	0	0	0.176667			Discocyclina in situ?
	M7S2	0	0.516667	0.236667	0.0433333	0.03	0	0.143333	0	0	0	0	0.00666667	0	0	0	0	0		0	0	0	0	0	0	0	0	0	0	0	0	0	0	0	0.0166667	0	0	0	0	0	0.00333333	0.00333333			Reworked Discocyclina
	M7S3	0.00666667	0.41	0.17	0.00666667	0.00333333	0	0.18	0	0	0	0.0433333	0.123333	0	0	0	0	0		0	0	0	0	0.00666667	0	0	0	0	0	0	0	0	0	0	0.0166667	0	0	0.00333333	0	0	0.0166667	0.0133333
	M7S4	0.00333333	0.21	0.646667	0.04	0.03	0	0.03	0.00666667	0	0	0	0.00333333	0	0	0	0	0		0	0	0	0	0	0	0	0	0	0	0	0.00333333	0	0	0	0.00666667	0.00666667	0	0	0	0	0.0133333	0
	M7S5	0	0.326667	0.436667	0.05	0	0	0.02	0.02	0	0	0.06	0.0466667	0	0	0	0	0		0	0	0.01	0	0	0	0	0	0	0	0	0	0	0	0	0.01	0	0	0	0	0	0.0133333	0.00666667
	M7S6	0	0.306667	0.336667	0.01	0	0	0.0666667	0	0	0	0.113333	0.0733333	0	0	0	0	0		0	0.01	0.0166667	0	0.00333333	0	0	0	0	0	0	0	0	0	0.00666667	0.00333333	0	0	0.0233333	0	0	0.02	0.01
	M7S7	0.00666667	0.186667	0.493333	0.09	0.00666667	0	0.146667	0	0	0	0.02	0.02	0	0	0	0	0		0	0	0	0	0.01	0	0	0	0	0	0.00666667	0	0	0	0	0	0	0.00333333	0	0	0	0.01	0
	M7S9	0.00333333	0.32	0.236667	0.08	0.02	0	0.14	0	0	0	0.03	0.05	0	0	0	0	0		0	0.01	0.00333333	0	0.0233333	0	0	0	0	0	0	0	0	0	0	0.03	0	0	0.00333333	0	0	0.0233333	0.0266667
	M7S10	0	0.316667	0.356667	0.02	0.02	0	0.11	0	0	0	0.0233333	0.0466667	0	0	0	0	0		0	0.01	0	0	0.0166667	0	0	0	0	0	0	0.00333333	0	0	0	0.0266667	0.00333333	0	0.01	0	0.00333333	0.0233333	0.01
	M7S11	0	0.226667	0.283333	0.0133333	0.01	0	0.353333	0	0	0	0.02	0.03	0	0	0	0	0		0	0.01	0	0	0.01	0	0.00333333	0	0	0	0	0	0	0	0	0	0	0	0.00333333	0	0.00333333	0.0133333	0.02
	M7S12	0.0333333	0.296667	0.25	0.123333	0.00333333	0	0	0	0	0	0.07	0.03	0	0	0	0	0		0	0	0.133333	0	0	0	0	0	0	0	0.00333333	0	0	0	0	0	0.0166667	0.00666667	0	0.01	0.0133333	0.01	0
	M7S13	0.00333333	0.166667	0.38	0.0766667	0.0166667	0	0.196667	0	0	0	0.0166667	0.01	0	0	0	0	0		0	0.00666667	0.0166667	0	0.0633333	0	0	0	0	0	0	0.02	0	0	0	0	0	0.00333333	0.01	0.00333333	0	0.01	0
	M7S14	0	0	0	0	0	0	1	0	0	0	0	0	0	0	0	0	0		0	0	0	0	0	0	0	0	0	0	0	0	0	0	0	0	0	0	0	0	0	0	0
	M7S15	0.00666667	0.366667	0.263333	0.0466667	0.0333333	0	0.00333333	0.00333333	0	0	0.0833333	0.05	0.00333333	0	0	0	0		0	0.00666667	0.0166667	0	0.0766667	0	0	0	0	0	0.00333333	0.00666667	0	0	0	0.00333333	0	0	0.00666667	0	0	0.02	0
	M7S16	0.0133333	0.116667	0.516667	0.00666667	0.0266667	0	0	0	0	0	0.0166667	0.0566667	0	0	0	0	0		0	0	0.00333333	0	0.0166667	0	0	0	0	0	0	0.0133333	0	0	0	0	0	0.00333333	0.01	0.00333333	0.183333	0.0133333	0
	M7S17	0	0	0.0366667	0.0266667	0	0	0.936667	0	0	0	0	0	0	0	0	0	0		0	0	0	0	0	0	0	0	0	0	0	0	0	0	0	0	0	0	0	0	0	0	0
	M7S18	0.00333333	0.416667	0.38	0.0433333	0.02	0	0.01	0	0	0	0.0266667	0.03	0.00333333	0	0	0	0		0	0.00666667	0	0	0.03	0	0	0	0	0	0	0.00333333	0	0	0	0.01	0	0	0.00333333	0	0	0.0133333	0
	M7S19	0.00666667	0.263333	0.266667	0.0466667	0	0	0.0266667	0	0	0	0.0433333	0.0833333	0	0	0	0	0		0	0.01	0	0	0.183333	0	0	0	0	0.02	0	0.01	0	0	0	0.00333333	0.0133333	0	0.00666667	0	0	0.0166667	0
	M7S21	0	0.136667	0.476667	0.03	0	0	0.31	0	0.00666667	0	0	0.00666667	0	0	0	0	0		0	0.01	0	0	0.00666667	0	0	0	0	0	0	0	0	0	0	0.01	0	0	0	0	0	0.00666667	0
	M7S22	0.00666667	0.113333	0.56	0.04	0.01	0	0.2	0	0	0	0.00333333	0.02	0	0	0	0	0		0	0.0133333	0	0	0.01	0	0	0	0	0.00666667	0	0	0	0	0	0	0.00333333	0	0	0.00333333	0	0.01	0
	M7S23	0.00666667	0.233333	0.473333	0.00333333	0.0133333	0	0.15	0	0	0	0.0333333	0.0133333	0	0	0	0	0		0	0.00333333	0	0	0.01	0	0	0	0	0	0	0.00333333	0	0	0	0.04	0	0	0.00666667	0	0	0.01	0
	M8S1	0	0.13	0.0333333	0.203333	0.01	0	0.473333	0	0	0	0.0266667	0.0466667	0	0	0	0	0		0	0.0133333	0.0133333	0	0.0266667	0	0	0	0	0	0	0.00333333	0	0	0	0.00333333	0.00333333	0	0	0.00333333	0	0.00333333	0.00666667
	M8S2	0.00333333	0.36	0.213333	0.00666667	0.00666667	0	0.163333	0	0	0	0.0966667	0.0433333	0	0	0	0	0		0	0	0	0	0.0366667	0	0	0	0	0	0	0.00666667	0	0	0	0.06	0	0	0	0	0	0.00333333	0
	M8S3	0.00666667	0.323333	0.243333	0.0333333	0.0233333	0.00666667	0.0233333	0	0	0	0.0433333	0.136667	0	0	0	0	0		0	0	0.0133333	0	0.06	0	0	0	0	0	0.00333333	0.0133333	0	0	0	0.0266667	0	0	0	0.00333333	0	0.0166667	0.0233333
	M8S4	0	0.323333	0.313333	0.0233333	0.0366667	0	0.00333333	0.00333333	0	0	0.11	0.0966667	0	0	0	0	0		0	0.00666667	0.0233333	0	0.04	0	0	0	0	0	0	0	0	0	0	0.0133333	0	0	0	0.00333333	0.00333333	0	0
	M8S5	0.01	0.22	0.21	0.06	0.01	0	0.44	0	0	0	0	0.01	0.02	0	0	0	0		0	0.01	0.01	0	0	0	0	0	0	0	0	0	0	0	0	0	0	0	0	0	0	0	0
	M8S6	0	0.29	0.36	0.01	0.02	0	0.22	0	0	0	0.02	0.02	0	0	0	0	0		0	0	0	0	0.01	0	0	0	0	0.01	0	0	0	0	0	0.03	0	0	0	0	0	0.01	0
	M8S7	0.01	0.2	0.48	0.05	0.02	0	0.17	0	0	0	0	0.02	0	0	0	0	0		0	0.01	0	0	0.01	0	0	0	0	0	0	0	0	0	0	0.01	0.01	0	0	0	0	0.01	0
	M8S8	0.00333333	0.373333	0.356667	0	0.0166667	0	0.02	0	0	0	0.04	0.03	0.01	0	0	0	0		0	0.01	0.0333333	0	0.0533333	0.00666667	0	0	0	0	0	0.0133333	0	0	0	0.0166667	0	0	0	0	0	0.0133333	0.00333333
	M8S9	0	0.313333	0.32	0.02	0.02	0	0.223333	0	0	0	0	0.00666667	0.01	0	0	0	0		0	0	0.00666667	0	0.05	0	0	0	0	0	0	0.00333333	0	0	0	0.02	0.00333333	0	0	0	0	0.00333333	0
	M8S10	0.01	0.26	0.306667	0.02	0.0133333	0	0.243333	0.0166667	0	0	0.00666667	0.06	0.00333333	0	0	0	0		0	0	0.0166667	0	0.0133333	0	0	0	0	0	0	0	0	0	0	0.00666667	0.00666667	0	0	0	0	0.00333333	0.0133333
	M8S11	0.00666667	0.273333	0.366667	0.00333333	0.00666667	0	0.123333	0	0	0	0.0333333	0.05	0	0	0	0	0		0	0	0.0266667	0	0.09	0	0	0	0	0.00333333	0	0.01	0	0	0	0.00333333	0.00333333	0	0	0	0	0	0
	M8S12	0.01	0.11	0.38	0.03	0.01	0	0.166667	0	0	0	0.02	0.06	0.06	0	0	0	0		0	0.0133333	0.01	0	0.103333	0	0	0	0	0	0	0.01	0	0	0	0	0.00333333	0	0.0133333	0	0	0	0
	M8S15	0.00666667	0.276667	0.383333	0.0233333	0.0133333	0	0.0133333	0	0	0	0.0366667	0.02	0.00666667	0	0	0	0		0	0.00333333	0.0133333	0	0.0166667	0	0	0	0	0.00333333	0	0	0	0	0	0.00333333	0.00666667	0	0	0.00333333	0.15	0.02	0
	M8S16	0.00333333	0.316667	0.233333	0	0.02	0	0.0233333	0.02	0	0	0.0566667	0.136667	0.0133333	0	0	0	0		0	0.03	0.00666667	0	0.0866667	0.01	0	0	0	0.00666667	0	0.00666667	0	0	0	0.0166667	0.00333333	0	0.01	0	0	0	0
	M8S17	0.0233333	0.253333	0.343333	0	0.02	0	0.08	0	0.01	0	0.0166667	0.08	0.01	0	0	0	0		0	0.0233333	0.00666667	0	0.0633333	0.00333333	0	0	0	0	0.01	0.04	0	0	0	0.00333333	0.00333333	0	0.00333333	0	0	0.00666667	0
	M8S18	0.0233333	0.38	0.293333	0.00333333	0.05	0	0.0133333	0.00333333	0.01	0	0.0366667	0.04	0.01	0	0	0	0		0	0.0333333	0	0	0.0866667	0	0	0	0	0	0	0	0	0	0	0	0	0	0.00333333	0.00333333	0.00333333	0.00666667	0
	M8S20	0.00333333	0.126667	0.493333	0	0.00666667	0	0.193333	0.00333333	0	0	0.0133333	0.04	0.00333333	0	0	0	0		0	0.01	0.0133333	0	0.0133333	0.00333333	0	0	0	0	0	0.00333333	0	0	0	0.0233333	0	0	0.00666667	0	0.00333333	0.04	0
	M8S22	0	0.216667	0.246667	0	0.00333333	0	0.36	0	0	0	0.00666667	0.06	0	0	0	0	0		0	0.01	0.01	0	0.04	0.00333333	0.00666667	0	0	0	0	0	0	0	0	0.0233333	0	0	0.00666667	0	0	0.00666667	0
	M8S23	0.00333333	0.22	0.453333	0.0133333	0.0266667	0	0.0833333	0	0	0	0	0.09	0.0266667	0	0	0	0		0	0	0	0	0	0	0.01	0	0	0	0	0	0	0	0.0133333	0.0366667	0	0	0.0166667	0	0	0.00666667	0
	M8S24	0.00666667	0.243333	0.3	0.0566667	0.00333333	0	0.11	0	0	0	0.0333333	0.0366667	0	0	0	0	0		0.03	0.0133333	0.143333	0	0.00666667	0	0	0	0	0	0	0	0	0	0	0	0.00333333	0	0.00333333	0	0	0.01	0
	M8S25	0	0.263333	0.166667	0.116667	0.00333333	0.01	0	0	0	0	0.07	0	0	0	0	0	0		0.01	0.0866667	0.253333	0	0	0	0	0	0	0	0	0	0	0	0	0	0	0	0.00333333	0	0	0.0166667	0
	M8S26	0.00333333	0.26	0.06	0.35	0.0166667	0.0133333	0	0	0	0	0.09	0.00333333	0	0	0	0	0		0.01	0.0166667	0.133333	0	0	0	0	0	0	0	0	0	0	0	0	0	0.01	0.00666667	0	0.02	0	0.00666667	0		corals->undetermined bioclast
	M8S29	0.00333333	0.06	0.286667	0.08	0.0133333	0	0.316667	0	0	0	0.0233333	0.01	0	0	0	0	0		0	0.02	0.00666667	0	0.01	0.00666667	0	0	0	0	0	0.01	0	0	0	0	0	0	0.00666667	0.00333333	0.12	0.34	0		0.316667
	M8S30	0.00333333	0.166667	0.446667	0.1	0.01	0	0	0	0	0	0.01	0.0833333	0.0133333	0	0	0	0		0	0.01	0.00666667	0	0.07	0	0.00333333	0	0	0	0	0.0233333	0	0	0	0	0	0	0.0133333	0.0166667	0	0.0233333	0
	M8S31	0	0.0866667	0.69	0.05	0.0266667	0	0.0666667	0	0	0	0.0166667	0.0133333	0	0	0.00333333	0	0	0	0	0.00333333	0.00333333	0	0.0133333	0	0	0	0	0	0	0	0	0	0	0	0.00666667	0	0.00666667	0	0.00333333	0.01	0
	M8S32A	0	0.156667	0.236667	0.03	0.0233333	0	0.226667	0.0233333	0	0	0.02	0.0933333	0.00333333	0	0	0	0		0	0.0166667	0.0433333	0	0.05	0	0.0266667	0	0	0	0	0.00666667	0	0	0.00666667	0	0.00333333	0	0.00333333	0.00333333	0	0.0266667	0
	M8S32B	0	0.143333	0.306667	0.236667	0.00666667	0	0.04	0	0	0	0.04	0.0133333	0	0	0	0	0.00333333		0	0.0466667	0.0866667	0	0.0133333	0	0.01	0	0	0	0	0	0	0	0	0	0.00333333	0.00333333	0.00333333	0.00333333	0	0.04	0
	M8S33b	0.0133333	0.186667	0.396667	0.01	0.0166667	0	0.136667	0	0	0	0.01	0.123333	0.01	0	0	0	0		0	0.00333333	0.01	0	0.0233333	0	0.01	0	0	0	0	0	0	0	0.00333333	0.02	0	0	0.01	0	0	0.0166667	0
	M8S34	0.00666667	0.28	0.423333	0.02	0.0233333	0	0.0766667	0	0	0	0.00666667	0.0866667	0.03	0	0	0	0		0	0.00333333	0.02	0	0.00333333	0	0	0	0	0	0	0.00666667	0	0	0	0	0	0.00333333	0.00333333	0	0	0.00666667	0
	M8S35	0	0.193333	0.31	0.0133333	0.00666667	0.00666667	0.0166667	0	0	0	0.0266667	0.01	0	0	0	0	0		0.196667	0.04	0.106667	0	0.0133333	0.03	0.01	0	0	0	0	0	0	0	0	0	0	0	0.00666667	0	0	0.0133333	0
	M8S43	0	0.356667	0.266667	0.01	0.0233333	0.02	0	0.00666667	0	0	0.0866667	0.00333333	0.00333333	0	0	0	0		0.0933333	0.0333333	0.03	0	0.00666667	0.01	0	0	0	0	0	0	0	0	0	0	0	0	0.0133333	0.00666667	0	0.03	0
	M8S54	0	0.486667	0.12	0.02	0.00333333	0.00666667	0	0	0	0	0.156667	0.00333333	0	0	0	0	0		0.0566667	0.0533333	0.0233333	0	0	0.0233333	0	0	0	0	0	0	0	0	0	0.00333333	0	0	0.01	0.00333333	0	0.03	0
	M8S55	0	0.32	0.04	0.213333	0.00333333	0	0	0	0	0	0.03	0	0	0	0	0	0		0.253333	0.0166667	0.0233333	0	0	0.02	0	0	0	0	0	0	0	0	0	0	0	0	0.00666667	0.00333333	0	0.07	0
	M8S56	0	0.46	0.0766667	0.0433333	0.00333333	0.0266667	0	0	0	0	0.0666667	0.02	0	0	0	0	0		0.136667	0.0633333	0.05	0	0	0.03	0	0	0	0	0	0	0	0	0	0	0	0	0.00333333	0	0	0.02	0
	M8S57a	0	0.513333	0.06	0.04	0.0333333	0.02	0	0	0	0	0.0966667	0.01	0	0	0	0	0		0.12	0.0266667	0.0333333	0	0	0.0233333	0	0	0	0	0	0	0	0	0	0.00333333	0	0	0.00333333	0	0	0.0166667	0
	M8S57b	0	0.393333	0.04	0.01	0.0233333	0.0133333	0.0366667	0	0	0	0.123333	0.0133333	0	0	0	0	0		0.18	0.06	0.0433333	0	0	0.0333333	0	0	0	0	0	0	0	0	0	0	0	0	0.01	0	0	0.02	0
	CANAL_14-2	0	0.303333	0.25	0.0133333	0.00666667	0.02	0	0.0366667	0	0	0.0666667	0.0333333	0	0	0	0	0		0.153333	0.01	0.0333333	0	0.02	0.0366667	0	0	0	0	0	0	0	0	0	0.00333333	0	0	0.00333333	0.00666667	0	0.00333333	0
	CANAL_16-1	0.00333333	0.233333	0.206667	0.0366667	0.0166667	0	0	0	0	0	0.193333	0.0133333	0	0	0	0	0		0.0566667	0.0366667	0.0566667	0	0.0266667	0.0433333	0	0	0	0	0	0.0133333	0	0	0	0	0	0	0.0133333	0.02	0	0.03	0
	CANAL_18-1	0	0.376667	0.16	0.0333333	0.00333333	0	0	0	0	0	0.176667	0.0533333	0	0	0	0	0		0.0533333	0.0233333	0.03	0	0.0233333	0.03	0	0	0	0	0	0	0	0	0	0	0	0	0.00666667	0.01	0	0.02	0
	CANAL_19-1	0	0.223333	0.413333	0.126667	0.00666667	0	0	0	0	0	0.09	0.02	0	0	0	0	0		0.0133333	0.01	0.0666667	0	0	0	0	0	0	0	0	0	0	0	0	0	0	0	0	0.0166667	0	0.0133333	0
	marmo 1	0.0133333	0.14	0.286667	0.05	0.0133333	0	0.386667	0	0	0	0.0366667	0.00666667	0	0	0	0.00333333	0		0	0.0233333	0.00666667	0	0.0133333	0	0	0	0.00333333	0	0	0	0	0	0	0	0.00666667	0	0	0.00333333	0	0.00666667	0
	marmo 2	0.00666667	0.136667	0.47	0.0733333	0.0366667	0.00333333	0	0	0	0	0.03	0	0	0	0	0	0		0	0	0	0	0	0	0	0	0	0	0	0	0	0	0	0	0	0	0	0.0133333	0.22	0.01	0
	marmo 3	0.01	0.283333	0.28	0.06	0.00666667	0	0.0633333	0	0	0	0.0566667	0.0233333	0	0	0	0	0		0	0.0166667	0.06	0	0.06	0	0.00666667	0	0	0	0	0	0	0	0	0.0433333	0.00333333	0	0.00666667	0	0	0.02	0
	marmo.2	0.00333333	0.346667	0.286667	0.09	0.00333333	0	0.0333333	0	0	0	0.04	0.0566667	0.01	0	0	0	0		0	0.0166667	0.0266667	0	0.0666667	0	0	0	0	0	0	0.00333333	0	0	0	0	0	0	0.00333333	0	0	0.0133333	0
	marmo.5	0	0.593333	0.196667	0.0166667	0.0366667	0	0	0	0	0	0.0366667	0.00666667	0	0.00333333	0	0	0		0.0433333	0.0133333	0.0166667	0	0	0.00333333	0	0	0	0	0	0	0	0	0	0.0133333	0.00333333	0	0.00666667	0	0	0.01	0
	marmo.6	0	0.536667	0.32	0.0166667	0.0133333	0.00666667	0	0	0	0	0	0	0.00333333	0	0	0	0		0.0266667	0.00666667	0.00333333	0	0	0	0	0	0	0	0	0.00333333	0	0	0	0.05	0	0	0.00666667	0	0	0.00666667	0

## Sheet: cluster
	cluster ultimo Bray-Curtis				quitando M7S2 y M7S4 (=0)			Las muestras M7S1-M7S10 ->Orthophragminids																quitando las muestras con Orthophragminids (M1S1-M7S10)
		terrigenous	austrotrillina	borelis	peneroplis	lepidocyclinids	amphistegina	neorotalia	risananeiza	nummulites	operculina	heterostegina	spiroclypeus	acervulina	planktonic foraminifera	Orthophragminids		LBF + CORALS -> se diluyen los corales en las facies de LBF							terrigenous	austrotrillina	borelis	peneroplis	lepidocyclinids	amphistegina	neorotalia	risananeiza	nummulites	operculina	heterostegina	spiroclypeus	acervulina	planktonic foraminifera	Orthophragminids
	M1S1'	0	0	0	0	0	11.4286	0	0	88.5714	0	0	0	0	0	0		FUERA (CASI TODO O 100% CORAL/CCA)						M1S1'	0	0	0	0	0	11.4286	0	0	88.5714	0	0	0	0	0	0
	M1S2	0	0	0	0	0	0	0	0	100	0	0	0	0	0	0		M3S10	M6S19					M1S2	0	0	0	0	0	0	0	0	100	0	0	0	0	0	0
	M1S3	0	0	0	0	0	14	12	0	64	0	2	0	0	8	0		M3S11	M6S20					M1S3	0	0	0	0	0	14	12	0	64	0	2	0	0	8	0
	M1S4	0	0	0	0	0	12.5	6.25	0	81.25	0	0	0	0	0	0		M3S14-I	M6S25					M1S4	0	0	0	0	0	12.5	6.25	0	81.25	0	0	0	0	0	0
	M1S5 I	0	0	0	0	0	12.9032	6.45161	0	77.4194	0	3.22581	0	0	0	0		M3S17	M6S26					M1S5 I	0	0	0	0	0	12.9032	6.45161	0	77.4194	0	3.22581	0	0	0	0
	M1S6	0	0	0	0	0	0	16.129	0	70.9677	3.22581	3.22581	0	0	6.45161	0		M4S1	M7S2					M1S6	0	0	0	0	0	0	16.129	0	70.9677	3.22581	3.22581	0	0	6.45161	0
	M1S7	0	0	0	0	0	2.22222	0	0	0	0	0	0	0	97.7778	0		M6S4	M7S4					M1S7	0	0	0	0	0	2.22222	0	0	0	0	0	0	0	97.7778	0
	M1S10	5.12821	0	2.5641	0	0	12.8205	58.9744	0	10.2564	0	10.2564	0	0	0	0		M6S11	M7S14					M1S10	5.12821	0	2.5641	0	0	12.8205	58.9744	0	10.2564	0	10.2564	0	0	0	0
	M1S11	0	0	0	0	0	12.1951	12.1951	0	73.1707	0	2.43902	0	0	0	0		M6S15	M7S17					M1S11	0	0	0	0	0	12.1951	12.1951	0	73.1707	0	2.43902	0	0	0	0
	M1S14	9.23077	0	0	0	53.8462	1.53846	0	0	0	26.1538	0	0	0	9.23077	0								M1S14	9.23077	0	0	0	53.8462	1.53846	0	0	0	26.1538	0	0	0	9.23077	0
	M1S15b	27.2727	0	0	0	22.7273	0	0	0	22.7273	18.1818	4.54545	0	0	4.54545	0				total muestras				M1S15b	27.2727	0	0	0	22.7273	0	0	0	22.7273	18.1818	4.54545	0	0	4.54545	0
	M1S16a	22.2222	0	0	0	30.1587	11.1111	14.2857	0	3.1746	15.873	0	0	0	3.1746	0		131		147				M1S16a	22.2222	0	0	0	30.1587	11.1111	14.2857	0	3.1746	15.873	0	0	0	3.1746	0
	M1S16b	20	0	0	0	26.1538	7.69231	36.9231	0	1.53846	7.69231	0	0	0	0	0		16						M1S16b	20	0	0	0	26.1538	7.69231	36.9231	0	1.53846	7.69231	0	0	0	0	0
	M2S1	13.2075	0	0	0	24.5283	24.5283	30.1887	0	0	7.54717	0	0	0	0	0								M2S1	13.2075	0	0	0	24.5283	24.5283	30.1887	0	0	7.54717	0	0	0	0	0
	M2S2I	15.3846	0	0	0	19.2308	9.61538	44.2308	0	0	11.5385	0	0	0	0	0								M2S2I	15.3846	0	0	0	19.2308	9.61538	44.2308	0	0	11.5385	0	0	0	0	0
	M2S3	6.15385	0	0	0	23.0769	18.4615	7.69231	0	0	44.6154	0	0	0	0	0								M2S3	6.15385	0	0	0	23.0769	18.4615	7.69231	0	0	44.6154	0	0	0	0	0
	M2S10	4.22535	0	0	0	21.1268	16.9014	15.493	0	1.40845	40.8451	0	0	0	0	0								M2S10	4.22535	0	0	0	21.1268	16.9014	15.493	0	1.40845	40.8451	0	0	0	0	0
	M2S12B	8.33333	0	0	0	37.5	20.8333	25	0	0	8.33333	0	0	0	0	0								M2S12B	8.33333	0	0	0	37.5	20.8333	25	0	0	8.33333	0	0	0	0	0
	M2S12C	0	0	0	0	66.6667	0	29.1667	0	0	4.16667	0	0	0	0	0								M2S12C	0	0	0	0	66.6667	0	29.1667	0	0	4.16667	0	0	0	0	0
	M2S13	2.66667	0	0	0	60	6.66667	20	0	0	10.6667	0	0	0	0	0								M2S13	2.66667	0	0	0	60	6.66667	20	0	0	10.6667	0	0	0	0	0
	M3S2	0	0	8.33333	0	0	8.33333	83.3333	0	0	0	0	0	0	0	0								M3S2	0	0	8.33333	0	0	8.33333	83.3333	0	0	0	0	0	0	0	0
	M3S3	10.6383	0	2.12766	4.25532	14.8936	23.4043	38.2979	0	0	6.38298	0	0	0	0	0								M3S3	10.6383	0	2.12766	4.25532	14.8936	23.4043	38.2979	0	0	6.38298	0	0	0	0	0
	M3S4	0	0	0	0	0	4	76	0	0	20	0	0	0	0	0								M3S4	0	0	0	0	0	4	76	0	0	20	0	0	0	0	0
	M3S5	1.5625	0	0	0	0	4.6875	92.1875	0	0	1.5625	0	0	0	0	0								M3S5	1.5625	0	0	0	0	4.6875	92.1875	0	0	1.5625	0	0	0	0	0
	M3S6	19.4444	2.77778	0	0	5.55556	8.33333	47.2222	0	0	16.6667	0	0	0	0	0								M3S6	19.4444	2.77778	0	0	5.55556	8.33333	47.2222	0	0	16.6667	0	0	0	0	0
	M3S12	0	0	0	0	0	0	100	0	0	0	0	0	0	0	0								M3S12	0	0	0	0	0	0	100	0	0	0	0	0	0	0	0
	M3S13	0	0	0	0	14.2857	14.2857	38.0952	11.9048	0	16.6667	4.7619	0	0	0	0								M3S13	0	0	0	0	14.2857	14.2857	38.0952	11.9048	0	16.6667	4.7619	0	0	0	0
	M3S15	0	5.26316	5.26316	5.26316	0	10.5263	73.6842	0	0	0	0	0	0	0	0								M3S15	0	5.26316	5.26316	5.26316	0	10.5263	73.6842	0	0	0	0	0	0	0	0
	M3S16	0	0	0	5.26316	10.5263	10.5263	31.5789	36.8421	0	0	5.26316	0	0	0	0								M3S16	0	0	0	5.26316	10.5263	10.5263	31.5789	36.8421	0	0	5.26316	0	0	0	0
	M3S18	5.26316	5.26316	0	0	26.3158	5.26316	21.0526	21.0526	0	5.26316	10.5263	0	0	0	0								M3S18	5.26316	5.26316	0	0	26.3158	5.26316	21.0526	21.0526	0	5.26316	10.5263	0	0	0	0
	M4S3	0	2.32558	0	0	6.97674	6.97674	16.2791	58.1395	0	4.65116	0	0	0	4.65116	0								M4S3	0	2.32558	0	0	6.97674	6.97674	16.2791	58.1395	0	4.65116	0	0	0	4.65116	0
	M4S7	0	0	0	0	1.63934	3.27869	95.082	0	0	0	0	0	0	0	0								M4S7	0	0	0	0	1.63934	3.27869	95.082	0	0	0	0	0	0	0	0
	M4S8	0	0	0	0	0	2.7027	97.2973	0	0	0	0	0	0	0	0								M4S8	0	0	0	0	0	2.7027	97.2973	0	0	0	0	0	0	0	0
	M4S9	0	1.49254	0	0	8.95522	5.97015	77.6119	0	0	0	5.97015	0	0	0	0								M4S9	0	1.49254	0	0	8.95522	5.97015	77.6119	0	0	0	5.97015	0	0	0	0
	M4S17	8.33333	8.33333	0	8.33333	0	0	0	50	0	0	25	0	0	0	0								M4S17	8.33333	8.33333	0	8.33333	0	0	0	50	0	0	25	0	0	0	0
	M5S2	18.75	0	0	0	18.75	0	0	62.5	0	0	0	0	0	0	0								M5S2	18.75	0	0	0	18.75	0	0	62.5	0	0	0	0	0	0	0
	M5S3	30.7692	0	0	0	7.69231	15.3846	15.3846	23.0769	0	7.69231	0	0	0	0	0								M5S3	30.7692	0	0	0	7.69231	15.3846	15.3846	23.0769	0	7.69231	0	0	0	0	0
	M5S4a	11.6279	0	0	0	32.5581	9.30233	13.9535	30.2326	0	0	2.32558	0	0	0	0								M5S4a	11.6279	0	0	0	32.5581	9.30233	13.9535	30.2326	0	0	2.32558	0	0	0	0
	M5S4b	20.6897	0	0	0	34.4828	3.44828	0	34.4828	0	0	3.44828	0	0	3.44828	0								M5S4b	20.6897	0	0	0	34.4828	3.44828	0	34.4828	0	0	3.44828	0	0	3.44828	0
	M5S5	9.09091	0	0	0	0	1.81818	74.5455	12.7273	0	0	1.81818	0	0	0	0								M5S5	9.09091	0	0	0	0	1.81818	74.5455	12.7273	0	0	1.81818	0	0	0	0
	M5S6	0.884956	0	0	0	0	2.65487	84.9558	10.6195	0	0	0.884956	0	0	0	0								M5S6	0.884956	0	0	0	0	2.65487	84.9558	10.6195	0	0	0.884956	0	0	0	0
	M5S7	10.5263	0	0	0	0	0	0	52.6316	0	0	36.8421	0	0	0	0								M5S7	10.5263	0	0	0	0	0	0	52.6316	0	0	36.8421	0	0	0	0
	M5S8	13.0435	8.69565	0	0	0	4.34783	8.69565	26.087	0	0	21.7391	17.3913	0	0	0								M5S8	13.0435	8.69565	0	0	0	4.34783	8.69565	26.087	0	0	21.7391	17.3913	0	0	0
	M5S10	0	18.1818	0	0	0	9.09091	36.3636	36.3636	0	0	0	0	0	0	0								M5S10	0	18.1818	0	0	0	9.09091	36.3636	36.3636	0	0	0	0	0	0	0
	M5S11	0	0	7.69231	3.84615	0	0	26.9231	42.3077	0	0	19.2308	0	0	0	0								M5S11	0	0	7.69231	3.84615	0	0	26.9231	42.3077	0	0	19.2308	0	0	0	0
	M5S12	31.8182	0	0	0	0	0	27.2727	40.9091	0	0	0	0	0	0	0								M5S12	31.8182	0	0	0	0	0	27.2727	40.9091	0	0	0	0	0	0	0
	M5S14	91.5663	0	0	0	0	2.40964	0	0	0	0	0	0	1.20482	4.81928	0								M5S14	91.5663	0	0	0	0	2.40964	0	0	0	0	0	0	1.20482	4.81928	0
	M5S14bis	28.5714	0	0	0	0	7.14286	0	0	0	0	0	0	64.2857	0	0								M5S14bis	28.5714	0	0	0	0	7.14286	0	0	0	0	0	0	64.2857	0	0
	M5S15	78.5714	0	0	0	0	8.92857	0	0	0	0	0	0	7.14286	5.35714	0								M5S15	78.5714	0	0	0	0	8.92857	0	0	0	0	0	0	7.14286	5.35714	0
	M6S1	0	0	0	0	0	23.8095	0	0	76.1905	0	0	0	0	0	0								M6S1	0	0	0	0	0	23.8095	0	0	76.1905	0	0	0	0	0	0
	M6S2	0	0	0	0	0	0	0	0	0	0	0	0	0	100	0								M6S2	0	0	0	0	0	0	0	0	0	0	0	0	0	100	0
	M6S3	0	0	0	11.7647	0	17.6471	58.8235	0	5.88235	0	0	0	0	5.88235	0								M6S3	0	0	0	11.7647	0	17.6471	58.8235	0	5.88235	0	0	0	0	5.88235	0
	M6S5	0	0	0	0	0	0	100	0	0	0	0	0	0	0	0								M6S5	0	0	0	0	0	0	100	0	0	0	0	0	0	0	0
	M6S6	0	0	0	0	13.0435	13.0435	34.7826	0	39.1304	0	0	0	0	0	0								M6S6	0	0	0	0	13.0435	13.0435	34.7826	0	39.1304	0	0	0	0	0	0
	M6S7	0	0	0	0	0	4.16667	12.5	0	83.3333	0	0	0	0	0	0								M6S7	0	0	0	0	0	4.16667	12.5	0	83.3333	0	0	0	0	0	0
	M6S8	0	0	0	0	0	28.5714	0	0	71.4286	0	0	0	0	0	0								M6S8	0	0	0	0	0	28.5714	0	0	71.4286	0	0	0	0	0	0
	M6S9	0	0	0	0	0	10.9589	27.3973	0	61.6438	0	0	0	0	0	0								M6S9	0	0	0	0	0	10.9589	27.3973	0	61.6438	0	0	0	0	0	0
	M6S10	10	0	0	2	56	10	8	0	0	14	0	0	0	0	0								M6S10	10	0	0	2	56	10	8	0	0	14	0	0	0	0	0
	M6S12	0	0	0	0	0	8	24	0	68	0	0	0	0	0	0								M6S12	0	0	0	0	0	8	24	0	68	0	0	0	0	0	0
	M6S13	0	0	0	0	0	0	0	0	100	0	0	0	0	0	0								M6S13	0	0	0	0	0	0	0	0	100	0	0	0	0	0	0
	M6S14	0	0	0	0	0	0	9.52381	0	90.4762	0	0	0	0	0	0								M6S14	0	0	0	0	0	0	9.52381	0	90.4762	0	0	0	0	0	0
	M6S16	0	0	0	1.88679	5.66038	1.88679	7.54717	0	83.0189	0	0	0	0	0	0								M6S16	0	0	0	1.88679	5.66038	1.88679	7.54717	0	83.0189	0	0	0	0	0	0
	M6S17	0	0	0	0	0	19.2308	26.9231	0	46.1538	0	7.69231	0	0	0	0								M6S17	0	0	0	0	0	19.2308	26.9231	0	46.1538	0	7.69231	0	0	0	0
	M6S18	0	0	0	0	0	7.27273	3.63636	0	81.8182	0	7.27273	0	0	0	0								M6S18	0	0	0	0	0	7.27273	3.63636	0	81.8182	0	7.27273	0	0	0	0
	M6S23	0	0	2.5	0	0	7.5	12.5	0	77.5	0	0	0	0	0	0								M6S23	0	0	2.5	0	0	7.5	12.5	0	77.5	0	0	0	0	0	0
	M6S24	0	0	0	10	0	10	60	0	20	0	0	0	0	0	0								M6S24	0	0	0	10	0	10	60	0	20	0	0	0	0	0	0
	M6S27	0	0	0	0	0	32	24	0	44	0	0	0	0	0	0								M6S27	0	0	0	0	0	32	24	0	44	0	0	0	0	0	0
	M6S28	0	0	2.5	0	0	0	30	0	60	0	7.5	0	0	0	0								M6S28	0	0	2.5	0	0	0	30	0	60	0	7.5	0	0	0	0
	M6S30	29.7297	0	0	0	16.2162	32.4324	21.6216	0	0	0	0	0	0	0	0								M6S30	29.7297	0	0	0	16.2162	32.4324	21.6216	0	0	0	0	0	0	0	0
	M7S1	0	0	0	0	0	0	0	0	0	0	0	0	0	0	100								M7S11	0	0	0	0	0	42.8571	0	0	42.8571	0	0	0	0	14.2857	0
	M7S3	0	0	0	0	0	0	0	0	33.3333	0	0	0	0	0	66.6667								M7S12	0	0	0	0	0	0	90.9091	0	0	0	0	0	0	9.09091	0
	M7S5	0	0	0	0	0	0	33.3333	0	16.6667	0	0	0	0	0	50								M7S13	0	0	0	0	0	7.69231	19.2308	0	73.0769	0	0	0	0	0	0
	M7S6	0	0	0	0	0	25	25	0	8.33333	0	0	0	0	0	41.6667								M7S15	0	0	0	0	0	6.66667	16.6667	0	76.6667	0	0	0	0	0	0
	M7S7	0	0	0	0	0	0	0	0	25	0	0	0	0	0	75								M7S16	0	0	0	0	0	0	1.63934	0	8.19672	0	0	0	0	90.1639	0
	M7S9	0	0	0	0	0	15.7895	5.26316	0	36.8421	0	0	0	0	0	42.1053								M7S18	0	0	0	0	0	18.1818	0	0	81.8182	0	0	0	0	0	0
	M7S10	0	0	0	0	0	25	0	0	25	0	0	0	0	8.33333	41.6667								M7S19	0	0	0	0	0	4.6875	0	0	85.9375	0	0	0	9.375	0	0
	M7S11	0	0	0	0	0	42.8571	0	0	42.8571	0	0	0	0	14.2857	0								M7S21	0	0	0	0	0	60	0	0	40	0	0	0	0	0	0
	M7S12	0	0	0	0	0	0	90.9091	0	0	0	0	0	0	9.09091	0								M7S22	0	0	0	0	0	44.4444	0	0	33.3333	0	0	0	22.2222	0	0
	M7S13	0	0	0	0	0	7.69231	19.2308	0	73.0769	0	0	0	0	0	0								M7S23	0	0	0	0	0	25	0	0	75	0	0	0	0	0	0
	M7S15	0	0	0	0	0	6.66667	16.6667	0	76.6667	0	0	0	0	0	0								M8S1	0	0	0	0	0	25	25	0	50	0	0	0	0	0	0
	M7S16	0	0	0	0	0	0	1.63934	0	8.19672	0	0	0	0	90.1639	0								M8S2	0	0	0	0	0	0	0	0	100	0	0	0	0	0	0
	M7S18	0	0	0	0	0	18.1818	0	0	81.8182	0	0	0	0	0	0								M8S3	0	0	0	0	0	0	18.1818	0	81.8182	0	0	0	0	0	0
	M7S19	0	0	0	0	0	4.6875	0	0	85.9375	0	0	0	9.375	0	0								M8S4	0	0	0	0	0	9.09091	31.8182	0	54.5455	0	0	0	0	4.54545	0
	M7S21	0	0	0	0	0	60	0	0	40	0	0	0	0	0	0								M8S5	0	0	0	0	0	0	100	0	0	0	0	0	0	0	0
	M7S22	0	0	0	0	0	44.4444	0	0	33.3333	0	0	0	22.2222	0	0								M8S6	0	0	0	0	0	0	50	0	50	0	0	0	0	0	0
	M7S23	0	0	0	0	0	25	0	0	75	0	0	0	0	0	0								M8S7	0	0	0	0	0	50	0	0	50	0	0	0	0	0	0
	M8S1	0	0	0	0	0	25	25	0	50	0	0	0	0	0	0								M8S8	0	0	0	0	0	9.67742	32.2581	0	51.6129	6.45161	0	0	0	0	0
	M8S2	0	0	0	0	0	0	0	0	100	0	0	0	0	0	0								M8S9	0	0	0	0	0	0	11.7647	0	88.2353	0	0	0	0	0	0
	M8S3	0	0	0	0	0	0	18.1818	0	81.8182	0	0	0	0	0	0								M8S10	0	0	0	0	0	0	55.5556	0	44.4444	0	0	0	0	0	0
	M8S4	0	0	0	0	0	9.09091	31.8182	0	54.5455	0	0	0	0	4.54545	0								M8S11	0	0	0	0	0	0	22.2222	0	75	0	0	0	2.77778	0	0
	M8S5	0	0	0	0	0	0	100	0	0	0	0	0	0	0	0								M8S12	0	0	0	0	0	10.5263	7.89474	0	81.5789	0	0	0	0	0	0
	M8S6	0	0	0	0	0	0	50	0	50	0	0	0	0	0	0								M8S15	0	0	0	0	0	1.78571	7.14286	0	8.92857	0	0	0	1.78571	80.3571	0
	M8S7	0	0	0	0	0	50	0	0	50	0	0	0	0	0	0								M8S16	0	0	0	0	0	21.4286	4.7619	0	61.9048	7.14286	0	0	4.7619	0	0
	M8S8	0	0	0	0	0	9.67742	32.2581	0	51.6129	6.45161	0	0	0	0	0								M8S17	0	0	0	0	0	23.8095	19.0476	0	47.619	4.7619	0	0	0	4.7619	0
	M8S9	0	0	0	0	0	0	11.7647	0	88.2353	0	0	0	0	0	0								M8S18	0	0	0	0	0	25	0	0	62.5	0	0	0	0	12.5	0
	M8S10	0	0	0	0	0	0	55.5556	0	44.4444	0	0	0	0	0	0								M8S20	0	0	0	0	0	23.0769	30.7692	0	30.7692	7.69231	0	0	0	7.69231	0
	M8S11	0	0	0	0	0	0	22.2222	0	75	0	0	0	2.77778	0	0								M8S22	0	0	0	0	0	14.2857	14.2857	0	57.1429	4.7619	9.52381	0	0	0	0
	M8S12	0	0	0	0	0	10.5263	7.89474	0	81.5789	0	0	0	0	0	0								M8S23	0	0	0	0	0	0	36.3636	0	36.3636	0	27.2727	0	0	0	0
	M8S15	0	0	0	0	0	1.78571	7.14286	0	8.92857	0	0	0	1.78571	80.3571	0								M8S24	0	0	0	0	15.5172	6.89655	74.1379	0	3.44828	0	0	0	0	0	0
	M8S16	0	0	0	0	0	21.4286	4.7619	0	61.9048	7.14286	0	0	4.7619	0	0								M8S25	2.77778	0	0	0	2.77778	24.0741	70.3704	0	0	0	0	0	0	0	0
	M8S17	0	0	0	0	0	23.8095	19.0476	0	47.619	4.7619	0	0	0	4.7619	0								M8S26	7.69231	0	0	0	5.76923	9.61538	76.9231	0	0	0	0	0	0	0	0
	M8S18	0	0	0	0	0	25	0	0	62.5	0	0	0	0	12.5	0								M8S29	0	0	0	0	0	12.2449	4.08163	0	6.12245	4.08163	0	0	0	73.4694	0
	M8S20	0	0	0	0	0	23.0769	30.7692	0	30.7692	7.69231	0	0	0	7.69231	0								M8S30	0	0	0	0	0	11.1111	7.40741	0	77.7778	0	3.7037	0	0	0	0
	M8S22	0	0	0	0	0	14.2857	14.2857	0	57.1429	4.7619	9.52381	0	0	0	0								M8S31	0	0	12.5	0	0	12.5	12.5	0	50	0	0	0	0	12.5	0
	M8S23	0	0	0	0	0	0	36.3636	0	36.3636	0	27.2727	0	0	0	0								M8S32	0	0	0	0	0	12.1951	31.7073	0	36.5854	0	19.5122	0	0	0	0
	M8S24	0	0	0	0	15.5172	6.89655	74.1379	0	3.44828	0	0	0	0	0	0								M8S33b	0	0	0	0	0	7.14286	21.4286	0	50	0	21.4286	0	0	0	0
	M8S25	2.77778	0	0	0	2.77778	24.0741	70.3704	0	0	0	0	0	0	0	0								M8S34	0	0	0	0	0	12.5	75	0	12.5	0	0	0	0	0	0
	M8S26	7.69231	0	0	0	5.76923	9.61538	76.9231	0	0	0	0	0	0	0	0								M8S35	1.65289	0	0	0	48.7603	9.91736	26.4463	0	3.30579	7.43802	2.47934	0	0	0	0
	M8S29	0	0	0	0	0	12.2449	4.08163	0	6.12245	4.08163	0	0	0	73.4694	0								M8S43	10.3448	0	0	0	48.2759	17.2414	15.5172	0	3.44828	5.17241	0	0	0	0	0
	M8S30	0	0	0	0	0	11.1111	7.40741	0	77.7778	0	3.7037	0	0	0	0								M8S54	4.08163	0	0	0	34.6939	32.6531	14.2857	0	0	14.2857	0	0	0	0	0
	M8S31	0	0	12.5	0	0	12.5	12.5	0	50	0	0	0	0	12.5	0								M8S55	0	0	0	0	80.8511	5.31915	7.44681	0	0	6.38298	0	0	0	0	0
	M8S32	0	0	0	0	0	12.1951	31.7073	0	36.5854	0	19.5122	0	0	0	0								M8S56	8.69565	0	0	0	44.5652	20.6522	16.3043	0	0	9.78261	0	0	0	0	0
	M8S33b	0	0	0	0	0	7.14286	21.4286	0	50	0	21.4286	0	0	0	0								M8S57a	8.95522	0	0	0	53.7313	11.9403	14.9254	0	0	10.4478	0	0	0	0	0
	M8S34	0	0	0	0	0	12.5	75	0	12.5	0	0	0	0	0	0								M8S57b	4.0404	0	0	0	54.5455	18.1818	13.1313	0	0	10.101	0	0	0	0	0
	M8S35	1.65289	0	0	0	48.7603	9.91736	26.4463	0	3.30579	7.43802	2.47934	0	0	0	0								CANAL_14-2	7.31707	0	0	0	56.0976	3.65854	12.1951	0	7.31707	13.4146	0	0	0	0	0
	M8S43	10.3448	0	0	0	48.2759	17.2414	15.5172	0	3.44828	5.17241	0	0	0	0	0								CANAL_16-1	0	0	0	0	25.7576	16.6667	25.7576	0	12.1212	19.697	0	0	0	0	0
	M8S54	4.08163	0	0	0	34.6939	32.6531	14.2857	0	0	14.2857	0	0	0	0	0								CANAL_18-1	0	0	0	0	33.3333	14.5833	18.75	0	14.5833	18.75	0	0	0	0	0
	M8S55	0	0	0	0	80.8511	5.31915	7.44681	0	0	6.38298	0	0	0	0	0								CANAL_19-1	0	0	0	0	14.8148	11.1111	74.0741	0	0	0	0	0	0	0	0
	M8S56	8.69565	0	0	0	44.5652	20.6522	16.3043	0	0	9.78261	0	0	0	0	0								marmo 1	0	0	0	7.14286	0	50	14.2857	0	28.5714	0	0	0	0	0	0
	M8S57a	8.95522	0	0	0	53.7313	11.9403	14.9254	0	0	10.4478	0	0	0	0	0								marmo 2	0	0	0	0	0	0	0	0	0	0	0	0	0	100	0
	M8S57b	4.0404	0	0	0	54.5455	18.1818	13.1313	0	0	10.101	0	0	0	0	0								marmo 3	0	0	0	0	0	11.6279	41.8605	0	41.8605	0	4.65116	0	0	0	0
	CANAL_14-2	7.31707	0	0	0	56.0976	3.65854	12.1951	0	7.31707	13.4146	0	0	0	0	0								marmo.2	0	0	0	0	0	15.1515	24.2424	0	60.6061	0	0	0	0	0	0
	CANAL_16-1	0	0	0	0	25.7576	16.6667	25.7576	0	12.1212	19.697	0	0	0	0	0								marmo.5	0	4.16667	0	0	54.1667	16.6667	20.8333	0	0	4.16667	0	0	0	0	0
	CANAL_18-1	0	0	0	0	33.3333	14.5833	18.75	0	14.5833	18.75	0	0	0	0	0								marmo.6	15.3846	0	0	0	61.5385	15.3846	7.69231	0	0	0	0	0	0	0	0
	CANAL_19-1	0	0	0	0	14.8148	11.1111	74.0741	0	0	0	0	0	0	0	0
	marmo 1	0	0	0	7.14286	0	50	14.2857	0	28.5714	0	0	0	0	0	0
	marmo 2	0	0	0	0	0	0	0	0	0	0	0	0	0	100	0
	marmo 3	0	0	0	0	0	11.6279	41.8605	0	41.8605	0	4.65116	0	0	0	0
	marmo.2	0	0	0	0	0	15.1515	24.2424	0	60.6061	0	0	0	0	0	0
	marmo.5	0	4.16667	0	0	54.1667	16.6667	20.8333	0	0	4.16667	0	0	0	0	0
	marmo.6	15.3846	0	0	0	61.5385	15.3846	7.69231	0	0	0	0	0	0	0	0

## Sheet: all components
		quitando componentes 0 (archaias)					fuera componentes si < 1% abundancia (haddonia, sphaerogypsina, chapmanina, lituolids)									para descricpion todos comp
		sin micritic matrix, cement -> texture					o irrelevantes (voids, undetermined encrusting, unidentified bioclastics)
		para analizar todos y agrupando por categorias interesantes para la reconstruccion paleoambiental							ej. Larger hyaline perforated-rotalids, large encrusting, larger porcellaneous, smaller benthics, planktonics																													recalculado
		nummulites	heterostegina	spiroclypeus	operculina	lepidocyclinids	amphistegina	neorotalia	risananeiza	austrotrillina	borelis	peneroplis	sorites	acervulina	carpenteria/victoriella	planorbulina/planorbulinella	smaller benthics	undetermined miliolid		CA Geniculates	CCA	corals	echinoderms	bryozoans	bivalves	brachiopods	balanids/barnacles	serpullids	terrigenous	planktonic foraminifera	Discocyclina
	M4S3	0	0	0	0.00666667	0.01	0.01	0.0233333	0.0833333	0.00333333	0	0	0	0	0	0.00666667	0.0166667	0.0233333	0	0.0166667	0.09	0.00333333	0.0333333	0.01	0.00333333	0	0.0233333	0	0	0.00666667	0
		benthic foraminifera																	other components
		large hyaline perforated rotalids								large porcellaneous			large hyaline perforated encrusting	LBF or not?		smaller benthics			corallines					other bioclasts				minerals
	samples	Nummulites	Heterostegina	Spiroclypeus	Operculina	Lepidocyclinids	Amphistegina	Neorotalia	Risananeiza	Austrotrillina	Borelis	Peneroplis	Acervulina	Victoriellids	Planorbulinids	Rotaliids	Miliolids	Textulariids	CA Geniculates	CCA	Corals	Echinoderms	Bryozoans	Bivalves	Brachiopods	Barnacles	Serpulids	Quartz	Planktonic foraminifera	orthophragminids	SUMA							Nummulites	Heterostegina	Spiroclypeus	Operculina	Lepidocyclinids	Amphistegina	Neorotalia	Risananeiza	Austrotrillina	Borelis	Peneroplis	Acervulina
	M1S1'	0.103333	0	0	0	0	0.0133333	0	0	0	0	0	0	0.01	0	0	0.0133333	0.00333333	0	0.22	0.0266667	0.0133333	0.02	0.00666667	0	0.00333333	0	0	0	0	0.433333						M1S1'	23.8462	0	0	0	0	3.07692	0	0	0	0	0	0
	M1S2	0.00666667	0	0	0	0	0	0	0	0	0	0	0	0	0	0.00333333	0	0	0	0.14	0.283333	0	0.00333333	0	0	0	0	0	0	0	0.436667						M1S2	1.52672	0	0	0	0	0	0	0	0	0	0	0
	M1S3	0.106667	0.00333333	0	0	0	0.0233333	0.02	0	0	0	0	0	0.01	0	0	0	0	0.00666667	0.316667	0.0166667	0.05	0.0333333	0.00666667	0	0	0	0	0.0133333	0	0.606667						M1S3	17.5824	0.549451	0	0	0	3.84615	3.2967	0	0	0	0	0
	M1S4	0.0433333	0	0	0	0	0.00666667	0.00333333	0	0	0	0	0	0	0.00333333	0	0.00333333	0	0	0.31	0.313333	0.0366667	0.0233333	0	0	0	0	0	0	0	0.743333						M1S4	5.8296	0	0	0	0	0.896861	0.44843	0	0	0	0	0
	M1S5 I	0.08	0.00333333	0	0	0	0.0133333	0.00666667	0	0	0	0	0	0.00333333	0	0	0	0	0.00333333	0.176667	0.253333	0.0133333	0.00666667	0.00333333	0	0	0	0	0	0	0.563333						M1S5 I	14.2012	0.591716	0	0	0	2.36686	1.18343	0	0	0	0	0
	M1S6	0.0733333	0.00333333	0	0.00333333	0	0	0.0166667	0	0	0	0	0	0.03	0	0	0	0.00333333	0.00333333	0.303333	0.07	0.0166667	0.0266667	0.00333333	0	0	0	0	0.00666667	0	0.56						M1S6	13.0952	0.595238	0	0.595238	0	0	2.97619	0	0	0	0	0
	M1S7	0	0	0	0	0	0.00333333	0	0	0	0	0	0	0	0	0.0133333	0	0	0	0.213333	0	0.0333333	0	0	0	0	0	0	0.146667	0	0.41						M1S7	0	0	0	0	0	0.813008	0	0	0	0	0	0
	M1S10	0.0133333	0.0133333	0	0	0	0.0166667	0.0766667	0	0	0.00333333	0	0	0	0	0.0233333	0.00333333	0	0	0.243333	0.04	0.00666667	0.03	0	0	0	0.00333333	0.00666667	0	0	0.48						M1S10	2.77778	2.77778	0	0	0	3.47222	15.9722	0	0	0.694444	0	0
	M1S11	0.1	0.00333333	0	0	0	0.0166667	0.0166667	0	0	0	0	0	0	0	0	0.00666667	0	0	0.223333	0.09	0.03	0.0366667	0.00333333	0	0	0.00333333	0	0	0	0.53						M1S11	18.8679	0.628931	0	0	0	3.14465	3.14465	0	0	0	0	0
	M1S14	0	0	0	0.0566667	0.116667	0.00333333	0	0	0	0	0	0	0	0	0	0	0.01	0	0.1	0	0.00333333	0.03	0.00333333	0	0	0	0.02	0.02	0	0.363333						M1S14	0	0	0	15.5963	32.1101	0.917431	0	0	0	0	0	0
	M1S15b	0.0166667	0.00333333	0	0.0133333	0.0166667	0	0	0	0	0	0	0	0	0	0.03	0	0	0	0.18	0.03	0.0233333	0.01	0.00333333	0	0	0	0.02	0.00333333	0	0.35						M1S15b	4.7619	0.952381	0	3.80952	4.7619	0	0	0	0	0	0	0
	M1S16a	0.00666667	0	0	0.0333333	0.0633333	0.0233333	0.03	0	0	0	0	0	0.00333333	0	0	0	0	0	0.19	0	0.02	0.0166667	0	0	0	0	0.0466667	0.00666667	0	0.44						M1S16a	1.51515	0	0	7.57576	14.3939	5.30303	6.81818	0	0	0	0	0
	M1S16b	0.00333333	0	0	0.0166667	0.0566667	0.0166667	0.08	0	0	0	0	0	0.00333333	0	0.0566667	0	0	0	0.196667	0	0.0133333	0.02	0	0	0	0.00333333	0.0433333	0	0	0.51						M1S16b	0.653595	0	0	3.26797	11.1111	3.26797	15.6863	0	0	0	0	0
	M2S1	0	0	0	0.0133333	0.0433333	0.0433333	0.0533333	0	0	0	0	0	0	0	0.03	0	0	0	0.256667	0	0.01	0	0	0	0	0	0.0233333	0	0	0.473333						M2S1	0	0	0	2.8169	9.15493	9.15493	11.2676	0	0	0	0	0
	M2S2I	0	0	0	0.02	0.0333333	0.0166667	0.0766667	0	0	0	0	0	0	0	0.0233333	0	0	0	0.196667	0	0.00666667	0.00333333	0	0	0	0	0.0266667	0	0	0.403333						M2S2I	0	0	0	4.95868	8.26446	4.13223	19.0083	0	0	0	0	0
	M2S3	0	0	0	0.0966667	0.05	0.04	0.0166667	0	0	0	0	0	0	0	0	0	0	0	0.203333	0	0.02	0.00666667	0.00333333	0	0	0	0.0133333	0	0	0.45						M2S3	0	0	0	21.4815	11.1111	8.88889	3.7037	0	0	0	0	0
	M2S10	0.00333333	0	0	0.0966667	0.05	0.04	0.0366667	0	0	0	0	0	0	0	0.0166667	0	0	0	0.213333	0	0.0233333	0.0266667	0	0	0	0	0.01	0	0	0.516667						M2S10	0.645161	0	0	18.7097	9.67742	7.74194	7.09677	0	0	0	0	0
	M2S12B	0	0	0	0.0133333	0.06	0.0333333	0.04	0	0	0	0	0	0	0.00333333	0.02	0	0	0	0.35	0.00666667	0.03	0.00666667	0	0	0	0	0.0133333	0	0	0.576667						M2S12B	0	0	0	2.31214	10.4046	5.78035	6.93642	0	0	0	0	0
	M2S12C	0	0	0	0.00333333	0.0533333	0	0.0233333	0	0	0	0	0	0	0	0.00333333	0	0	0	0.35	0	0.0166667	0.05	0	0	0	0	0	0	0	0.5						M2S12C	0	0	0	0.666667	10.6667	0	4.66667	0	0	0	0	0
	M2S13	0	0	0	0.0266667	0.15	0.0166667	0.05	0	0	0	0	0	0.01	0	0	0	0	0	0.38	0	0.01	0.02	0	0	0	0	0.00666667	0	0	0.67						M2S13	0	0	0	3.9801	22.3881	2.48756	7.46269	0	0	0	0	0
	M3S2	0	0	0	0	0	0.00333333	0.0333333	0	0	0.00333333	0	0	0.00333333	0	0.0266667	0.06	0.00333333	0.00333333	0.33	0	0.0666667	0.0266667	0	0	0	0	0	0	0	0.56						M3S2	0	0	0	0	0	0.595238	5.95238	0	0	0.595238	0	0
	M3S3	0	0	0	0.01	0.0233333	0.0366667	0.06	0	0	0.00333333	0.00666667	0	0.02	0.01	0.0166667	0.03	0.00333333	0.00333333	0.2	0	0.06	0.00666667	0	0	0	0	0.0166667	0	0	0.506667						M3S3	0	0	0	1.97368	4.60526	7.23684	11.8421	0	0	0.657895	1.31579	0
	M3S4	0	0	0	0.0166667	0	0.00333333	0.0633333	0	0	0	0	0	0.0533333	0.0166667	0.0333333	0	0.00333333	0.00333333	0.226667	0	0.13	0.0166667	0	0	0	0	0	0	0	0.566667						M3S4	0	0	0	2.94118	0	0.588235	11.1765	0	0	0	0	0
	M3S5	0	0	0	0.00333333	0	0.01	0.196667	0	0	0	0	0	0.0166667	0.00666667	0.0333333	0.0166667	0.00666667	0.00333333	0.106667	0	0.0433333	0.00333333	0	0	0	0	0.00333333	0	0	0.45						M3S5	0	0	0	0.740741	0	2.22222	43.7037	0	0	0	0	0
	M3S6	0	0	0	0.02	0.00666667	0.01	0.0566667	0	0.00333333	0	0	0	0.0333333	0	0.02	0.0133333	0.0166667	0.0233333	0.163333	0	0.0533333	0	0	0	0	0	0.0233333	0	0	0.443333						M3S6	0	0	0	4.51128	1.50376	2.25564	12.782	0	0.75188	0	0	0
	M3S10	0	0	0	0	0	0	0	0	0.00333333	0	0.00666667	0	0.0133333	0	0.0133333	0.03	0.00333333	0	0.163333	0.36	0.00333333	0	0	0	0	0	0	0	0	0.596667						M3S10	0	0	0	0	0	0	0	0	0.558659	0	1.11732	0
	M3S11	0	0	0	0	0	0	0	0	0	0	0	0	0	0	0	0	0	0	0.03	0.896667	0	0	0	0	0	0	0	0	0	0.926667						M3S11	0	0	0	0	0	0	0	0	0	0	0	0
	M3S12	0	0	0	0	0	0	0.00666667	0	0	0	0	0	0	0	0	0.00333333	0.00666667	0	0.293333	0.106667	0.00333333	0.00666667	0	0	0	0.00666667	0	0	0	0.433333						M3S12	0	0	0	0	0	0	1.53846	0	0	0	0	0
	M3S13	0	0.00666667	0	0.0233333	0.02	0.02	0.0533333	0.0166667	0	0	0	0	0	0	0.01	0.00333333	0	0.00333333	0.193333	0.0666667	0.0566667	0.0166667	0	0	0	0.00333333	0	0	0	0.493333						M3S13	0	1.35135	0	4.72973	4.05405	4.05405	10.8108	3.37838	0	0	0	0
	M3S14-I	0	0	0	0	0	0	0	0	0	0	0	0	0	0	0	0	0	0	0.0633333	0.836667	0	0	0	0	0	0	0	0	0	0.9						M3S14-I	0	0	0	0	0	0	0	0	0	0	0	0
	M3S15	0	0	0	0	0	0.00666667	0.0466667	0	0.00333333	0.00333333	0.00333333	0	0.00666667	0	0	0.01	0	0	0.163333	0.07	0	0	0	0	0	0	0	0	0	0.313333						M3S15	0	0	0	0	0	2.12766	14.8936	0	1.06383	1.06383	1.06383	0
	M3S16	0	0.00333333	0	0	0.00666667	0.00666667	0.02	0.0233333	0	0	0.00333333	0	0.01	0.00333333	0.0133333	0.0233333	0	0.00666667	0.116667	0.0633333	0.00666667	0.00666667	0	0.00333333	0	0	0	0	0	0.316667						M3S16	0	1.05263	0	0	2.10526	2.10526	6.31579	7.36842	0	0	1.05263	0
	M3S17	0	0	0	0	0	0	0	0	0	0	0	0	0.00666667	0.00333333	0.00333333	0.00333333	0.00333333	0.00333333	0.0233333	0.796667	0.00666667	0	0	0	0	0	0	0	0	0.85						M3S17	0	0	0	0	0	0	0	0	0	0	0	0
	M3S18	0	0.00666667	0	0.00333333	0.0166667	0.00333333	0.0133333	0.0133333	0.00333333	0	0	0	0	0.00333333	0.0133333	0.0233333	0.00333333	0.00666667	0.16	0.0466667	0.0133333	0.0266667	0	0	0	0.00666667	0.00333333	0	0	0.366667						M3S18	0	1.81818	0	0.909091	4.54545	0.909091	3.63636	3.63636	0.909091	0	0	0
	M4S1	0	0	0	0	0	0.01	0	0	0	0.00333333	0	0	0	0	0	0.01	0	0.01	0.14	0.226667	0.0233333	0	0.01	0	0	0	0	0	0	0.433333						M4S1	0	0	0	0	0	2.30769	0	0	0	0.769231	0	0
	M4S3	0	0	0	0.00666667	0.01	0.01	0.0233333	0.0833333	0.00333333	0	0	0	0	0.00666667	0.0166667	0.0233333	0	0.0166667	0.09	0.00333333	0.0333333	0.01	0.00333333	0	0.0233333	0	0	0.00666667	0	0.37						M4S3	0	0	0	1.8018	2.7027	2.7027	6.30631	22.5225	0.900901	0	0	0
	M4S7	0	0	0	0	0.00333333	0.00666667	0.193333	0	0	0	0	0	0	0	0.00666667	0.0166667	0.00666667	0.01	0.3	0	0.12	0.00666667	0	0	0	0	0	0	0	0.67						M4S7	0	0	0	0	0.497512	0.995025	28.8557	0	0	0	0	0
	M4S8	0	0	0	0	0	0.00333333	0.12	0	0	0	0	0	0	0.00333333	0.0133333	0.00333333	0	0.00333333	0.276667	0	0.113333	0.0366667	0	0	0	0	0	0	0	0.573333						M4S8	0	0	0	0	0	0.581395	20.9302	0	0	0	0	0
	M4S9	0	0.0133333	0	0	0.02	0.0133333	0.173333	0	0.00333333	0	0	0	0.00666667	0	0.0166667	0	0	0.00666667	0.19	0	0.193333	0.0266667	0	0	0	0	0	0	0	0.663333						M4S9	0	2.01005	0	0	3.01508	2.01005	26.1307	0	0.502513	0	0	0
	M4S17	0	0.01	0	0	0	0	0	0.02	0.00333333	0	0.00333333	0	0	0.00333333	0	0.02	0.00333333	0.00666667	0.196667	0	0.0466667	0.00333333	0.00333333	0	0	0	0.00333333	0	0	0.323333						M4S17	0	3.09278	0	0	0	0	0	6.18557	1.03093	0	1.03093	0
	M5S2	0	0	0	0	0.01	0	0	0.0333333	0	0	0	0	0	0	0.00666667	0.01	0	0	0.36	0.0233333	0	0.00666667	0.00333333	0.01	0	0	0.01	0	0	0.473333						M5S2	0	0	0	0	2.11268	0	0	7.04225	0	0	0	0
	M5S3	0	0	0	0.00333333	0.00333333	0.00666667	0.00666667	0.01	0	0	0	0	0	0	0	0	0	0	0.103333	0	0.143333	0.0933333	0.01	0	0	0	0.0233333	0	0	0.403333						M5S3	0	0	0	0.826446	0.826446	1.65289	1.65289	2.47934	0	0	0	0
	M5S4a	0	0.00333333	0	0	0.0466667	0.0133333	0.02	0.0433333	0	0	0	0	0	0	0	0.00333333	0	0	0.206667	0	0.0266667	0.0766667	0.00333333	0	0	0.00333333	0.0166667	0	0	0.463333						M5S4a	0	0.719424	0	0	10.0719	2.8777	4.31655	9.35252	0	0	0	0
	M5S4b	0	0.00333333	0	0	0.0333333	0.00333333	0	0.0333333	0	0	0	0	0	0	0	0.0133333	0	0	0.166667	0	0.02	0.0366667	0.00666667	0	0	0	0.02	0.00333333	0	0.34						M5S4b	0	0.980392	0	0	9.80392	0.980392	0	9.80392	0	0	0	0
	M5S5	0	0.00333333	0	0	0	0.00333333	0.136667	0.0233333	0	0	0	0	0	0	0	0.00666667	0	0	0.19	0	0.0466667	0.00666667	0	0	0	0	0.0166667	0	0	0.433333						M5S5	0	0.769231	0	0	0	0.769231	31.5385	5.38462	0	0	0	0
	M5S6	0	0.00333333	0	0	0	0.01	0.32	0.04	0	0	0	0	0	0.00333333	0	0.00333333	0.00333333	0.00666667	0.16	0	0.04	0.00333333	0.00333333	0	0	0.01	0.00333333	0	0	0.61						M5S6	0	0.546448	0	0	0	1.63934	52.459	6.55738	0	0	0	0
	M5S7	0	0.0233333	0	0	0	0	0	0.0333333	0	0	0	0	0	0	0	0.00666667	0	0	0.173333	0.126667	0.06	0.0266667	0	0	0	0	0.00666667	0	0	0.456667						M5S7	0	5.10949	0	0	0	0	0	7.29927	0	0	0	0
	M5S8	0	0.0166113	0.013289	0	0	0.00332226	0.00664452	0.0199336	0.00664452	0	0	0	0	0	0	0.00996678	0	0	0.186047	0.0365449	0.0465116	0	0.00664452	0	0	0	0.00996678	0	0	0.362126						M5S8	0	4.58716	3.66972	0	0	0.917431	1.83486	5.50459	1.83486	0	0	0
	M5S10	0	0	0	0	0	0.00333333	0.0133333	0.0133333	0.00666667	0	0	0	0	0	0	0.00333333	0	0	0.276667	0.06	0.05	0	0.00333333	0	0	0.0533333	0	0	0	0.483333						M5S10	0	0	0	0	0	0.689655	2.75862	2.75862	1.37931	0	0	0
	M5S11	0	0.0166667	0	0	0	0	0.0233333	0.0366667	0	0.00666667	0.00333333	0	0	0	0	0	0	0.00333333	0.236667	0.09	0.0333333	0	0.00333333	0	0	0	0	0	0	0.453333						M5S11	0	3.67647	0	0	0	0	5.14706	8.08824	0	1.47059	0.735294	0
	M5S12	0	0	0	0	0	0	0.02	0.03	0	0	0	0	0	0.00333333	0	0.00333333	0	0.0133333	0.103333	0	0.0266667	0.00333333	0.00333333	0	0	0	0.0533333	0	0	0.26						M5S12	0	0	0	0	0	0	7.69231	11.5385	0	0	0	0
	M5S14	0	0	0	0	0	0.00666667	0	0	0	0	0	0.00333333	0	0	0.02	0.00333333	0.00333333	0.00666667	0.24	0	0.03	0.00333333	0.0133333	0	0.0633333	0.00333333	0.253333	0.0133333	0	0.663333						M5S14	0	0	0	0	0	1.00503	0	0	0	0	0	0.502513
	M5S14bis	0	0	0	0	0	0.00666667	0	0	0	0	0	0.06	0	0	0.00666667	0	0.01	0.00333333	0.646667	0	0.01	0.00333333	0	0	0	0.0133333	0.0266667	0	0	0.786667						M5S14bis	0	0	0	0	0	0.847458	0	0	0	0	0	7.62712
	M5S15	0	0	0	0	0	0.0166667	0	0	0	0	0	0.0133333	0	0	0.0166667	0	0	0.00333333	0.346667	0	0.03	0.0166667	0.03	0	0.00666667	0.01	0.146667	0.01	0	0.646667						M5S15	0	0	0	0	0	2.57732	0	0	0	0	0	2.06186
	M6S1	0.0533333	0	0	0	0	0.0166667	0	0	0	0	0	0	0	0	0	0	0	0	0.163333	0.0333333	0.0333333	0.0433333	0	0	0	0	0	0	0	0.343333						M6S1	15.534	0	0	0	0	4.85437	0	0	0	0	0	0
	M6S2	0	0	0	0	0	0	0	0	0	0	0	0	0	0	0	0	0	0	0	0	0.0233333	0	0	0	0	0	0	0.156667	0	0.18						M6S2	0	0	0	0	0	0	0	0	0	0	0	0
	M6S3	0.00333333	0	0	0	0	0.00666667	0.0333333	0	0	0	0.00666667	0	0.00666667	0	0	0	0	0.0333333	0.416667	0	0.123333	0.09	0	0	0	0	0	0.00333333	0	0.723333						M6S3	0.460829	0	0	0	0	0.921659	4.60829	0	0	0	0.921659	0
	M6S4	0	0	0	0	0	0	0	0	0	0	0	0	0	0	0	0.00333333	0	0	0.116667	0.24	0.00666667	0.0166667	0	0	0	0	0	0	0	0.383333						M6S4	0	0	0	0	0	0	0	0	0	0	0	0
	M6S5	0	0	0	0	0	0	0.0866667	0	0	0	0	0	0	0.00333333	0	0.01	0	0	0.16	0.486667	0.0766667	0.03	0	0	0	0	0	0	0	0.853333						M6S5	0	0	0	0	0	0	10.1563	0	0	0	0	0
	M6S6	0.03	0	0	0	0.01	0.01	0.0266667	0	0	0	0	0	0.0366667	0	0	0	0	0.0133333	0.246667	0.123333	0.0533333	0.0666667	0	0	0	0	0	0	0	0.616667						M6S6	4.86486	0	0	0	1.62162	1.62162	4.32432	0	0	0	0	0
	M6S7	0.0666667	0	0	0	0	0.00333333	0.01	0	0	0	0	0	0	0	0	0.00333333	0	0	0.243333	0.216667	0.0233333	0.03	0	0	0	0	0	0	0	0.596667						M6S7	11.1732	0	0	0	0	0.558659	1.67598	0	0	0	0	0
	M6S8	0.0166667	0	0	0	0	0.00666667	0	0	0	0	0	0	0.02	0	0	0.00333333	0	0.00333333	0.253333	0.243333	0.04	0.03	0	0	0	0	0	0	0	0.616667						M6S8	2.7027	0	0	0	0	1.08108	0	0	0	0	0	0
	M6S9	0.15	0	0	0	0	0.0266667	0.0666667	0	0	0	0	0	0.01	0	0	0	0	0.00333333	0.34	0.0233333	0.106667	0.0533333	0	0	0	0	0	0	0	0.78						M6S9	19.2308	0	0	0	0	3.4188	8.54701	0	0	0	0	0
	M6S10	0	0	0	0.0233333	0.0933333	0.0166667	0.0133333	0	0	0	0.00333333	0	0	0	0.01	0	0.00333333	0	0.506667	0	0.163333	0.01	0	0	0	0	0.0166667	0	0	0.86						M6S10	0	0	0	2.71318	10.8527	1.93798	1.55039	0	0	0	0.387597	0
	M6S11	0	0	0	0	0	0	0	0	0	0	0	0	0	0	0	0	0	0	0.11	0.496667	0	0.01	0	0	0	0	0	0	0	0.616667						M6S11	0	0	0	0	0	0	0	0	0	0	0	0
	M6S12	0.0566667	0	0	0	0	0.00666667	0.02	0	0	0	0	0	0.0233333	0	0	0	0	0.00333333	0.25	0.02	0.09	0.06	0	0	0	0.00333333	0	0	0	0.533333						M6S12	10.625	0	0	0	0	1.25	3.75	0	0	0	0	0
	M6S13	0.0866667	0	0	0	0	0	0	0	0	0	0	0	0	0	0	0.00333333	0	0.00333333	0.273333	0.02	0.0333333	0.0833333	0	0	0	0	0	0	0	0.503333						M6S13	17.2185	0	0	0	0	0	0	0	0	0	0	0
	M6S14	0.0633333	0	0	0	0	0	0.00666667	0	0	0	0	0	0	0	0	0	0	0	0.236667	0.0533333	0.0766667	0.0433333	0	0	0	0.04	0	0	0	0.52						M6S14	12.1795	0	0	0	0	0	1.28205	0	0	0	0	0
	M6S15	0	0	0	0	0	0	0.00333333	0	0	0	0	0	0	0	0.00333333	0.00333333	0	0.0333333	0.22	0.0733333	0.0166667	0	0	0	0	0	0	0	0	0.353333						M6S15	0	0	0	0	0	0	0.943396	0	0	0	0	0
	M6S16	0.146667	0	0	0	0.01	0.00333333	0.0133333	0	0	0	0.00333333	0	0	0	0	0.00666667	0	0.00666667	0.223333	0.03	0.02	0.00666667	0	0	0	0	0	0	0	0.47						M6S16	31.2057	0	0	0	2.12766	0.70922	2.83688	0	0	0	0.70922	0
	M6S17	0.04	0.00666667	0	0	0	0.0166667	0.0233333	0	0	0	0	0	0.00666667	0	0	0	0	0	0.243333	0.103333	0.05	0.01	0	0	0	0	0	0	0	0.5						M6S17	8	1.33333	0	0	0	3.33333	4.66667	0	0	0	0	0
	M6S18	0.15	0.0133333	0	0	0	0.0133333	0.00666667	0	0	0	0	0	0	0	0.00666667	0.00666667	0	0	0.32	0.00333333	0.05	0.06	0	0	0	0.00666667	0	0	0	0.636667						M6S18	23.5602	2.09424	0	0	0	2.09424	1.04712	0	0	0	0	0
	M6S19	0.0133333	0	0	0	0	0.00333333	0.00333333	0	0	0	0	0	0	0	0	0	0	0	0.0566667	0.823333	0.0133333	0	0	0	0	0	0	0	0	0.913333						M6S19	1.45985	0	0	0	0	0.364964	0.364964	0	0	0	0	0
	M6S20	0.0133333	0	0	0	0	0	0.0133333	0	0	0	0	0	0	0	0	0	0	0	0.113333	0.723333	0	0.01	0	0	0.01	0	0	0	0	0.883333						M6S20	1.50943	0	0	0	0	0	1.50943	0	0	0	0	0
	M6S23	0.103333	0	0	0	0	0.01	0.0166667	0	0	0.00333333	0	0	0.00333333	0	0	0	0	0.00333333	0.27	0.236667	0.0333333	0	0	0	0	0	0	0	0	0.68						M6S23	15.1961	0	0	0	0	1.47059	2.45098	0	0	0.490196	0	0
	M6S24	0.00666667	0	0	0	0	0.00333333	0.02	0	0	0	0.00333333	0	0.0133333	0	0.00666667	0	0	0	0.196667	0	0.09	0.0233333	0	0	0	0	0	0	0	0.363333						M6S24	1.83486	0	0	0	0	0.917431	5.50459	0	0	0	0.917431	0
	M6S25	0	0	0	0	0	0.00333333	0	0	0	0	0	0	0	0	0	0	0.00333333	0	0.09	0.173333	0.01	0.01	0	0	0	0	0	0	0	0.29						M6S25	0	0	0	0	0	1.14943	0	0	0	0	0	0
	M6S26	0	0	0	0	0	0	0	0	0	0	0	0	0	0	0	0	0	0	0.09	0.736667	0	0	0	0	0	0	0	0	0	0.826667						M6S26	0	0	0	0	0	0	0	0	0	0	0	0
	M6S27	0.0366667	0	0	0	0	0.0266667	0.02	0	0	0	0	0	0	0	0	0	0	0.0133333	0.246667	0	0.0233333	0.0166667	0	0	0	0.00333333	0	0	0	0.386667						M6S27	9.48276	0	0	0	0	6.89655	5.17241	0	0	0	0	0
	M6S28	0.08	0.01	0	0	0	0	0.04	0	0	0.00333333	0	0	0	0	0	0	0	0	0.296667	0	0.04	0.0266667	0	0	0	0	0	0	0	0.496667						M6S28	16.1074	2.01342	0	0	0	0	8.05369	0	0	0.671141	0	0
	M6S30	0	0	0	0	0.02	0.04	0.0266667	0	0	0	0	0	0	0	0	0	0	0	0.616667	0	0.01	0.00666667	0.00333333	0	0	0	0.0366667	0	0	0.76						M6S30	0	0	0	0	2.63158	5.26316	3.50877	0	0	0	0	0
	M7S1	0	0	0	0	0	0	0	0	0	0	0	0	0	0	0	0.00333333	0	0	0.256667	0.01	0.01	0	0	0	0	0	0	0	0.176667	0.456667						M7S1	0	0	0	0	0	0	0	0	0	0	0	0
	M7S2	0	0	0	0	0	0	0	0	0	0	0	0	0	0	0	0	0	0	0.516667	0.143333	0	0.00666667	0	0	0	0	0	0	0	0.666667						M7S2	0	0	0	0	0	0	0	0	0	0	0	0
	M7S3	0.00666667	0	0	0	0	0	0	0	0	0	0	0	0	0	0	0	0	0.00666667	0.41	0.18	0.0433333	0.123333	0	0	0	0	0	0	0.0133333	0.783333						M7S3	0.851064	0	0	0	0	0	0	0	0	0	0	0
	M7S4	0	0	0	0	0	0	0	0	0	0	0	0	0.00333333	0	0	0.00666667	0	0.00333333	0.21	0.03	0	0.00333333	0.00666667	0	0	0	0	0	0	0.263333						M7S4	0	0	0	0	0	0	0	0	0	0	0	0
	M7S5	0.00333333	0	0	0	0	0	0.01	0	0	0	0	0	0	0	0	0	0	0	0.326667	0.02	0.06	0.0466667	0.02	0	0	0	0	0	0.00666667	0.493333						M7S5	0.675676	0	0	0	0	0	2.02703	0	0	0	0	0
	M7S6	0.00333333	0	0	0	0	0.01	0.0166667	0	0	0	0	0	0	0	0	0	0	0	0.306667	0.0666667	0.113333	0.0733333	0	0	0	0	0	0	0.01	0.6						M7S6	0.555556	0	0	0	0	1.66667	2.77778	0	0	0	0	0
	M7S7	0.01	0	0	0	0	0	0	0	0	0	0	0	0	0	0	0	0.00333333	0.00666667	0.186667	0.146667	0.02	0.02	0	0	0	0	0	0	0.00333333	0.396667						M7S7	2.52101	0	0	0	0	0	0	0	0	0	0	0
	M7S9	0.0233333	0	0	0	0	0.01	0.00333333	0	0	0	0	0	0	0	0	0	0	0.00333333	0.32	0.14	0.03	0.05	0	0	0	0	0	0	0.0266667	0.606667						M7S9	3.84615	0	0	0	0	1.64835	0.549451	0	0	0	0	0
	M7S10	0.0166667	0	0	0	0	0.01	0	0	0	0	0	0	0.00333333	0	0	0.00333333	0	0	0.316667	0.11	0.0233333	0.0466667	0	0	0	0	0	0.00333333	0.01	0.543333						M7S10	3.06748	0	0	0	0	1.84049	0	0	0	0	0	0
	M7S11	0.01	0	0	0	0	0.01	0	0	0	0	0	0	0	0	0	0	0	0	0.226667	0.353333	0.02	0.03	0	0	0	0	0	0.00333333	0	0.653333						M7S11	1.53061	0	0	0	0	1.53061	0	0	0	0	0	0
	M7S12	0	0	0	0	0	0	0.133333	0	0	0	0	0	0	0	0.01	0.0166667	0.00666667	0.0333333	0.296667	0	0.07	0.03	0	0	0	0	0	0.0133333	0	0.61						M7S12	0	0	0	0	0	0	21.8579	0	0	0	0	0
	M7S13	0.0633333	0	0	0	0	0.00666667	0.0166667	0	0	0	0	0	0.02	0	0.00333333	0	0.00333333	0.00333333	0.166667	0.196667	0.0166667	0.01	0	0	0	0	0	0	0	0.506667						M7S13	12.5	0	0	0	0	1.31579	3.28947	0	0	0	0	0
	M7S14	0	0	0	0	0	0	0	0	0	0	0	0	0	0	0	0	0	0	0	1	0	0	0	0	0	0	0	0	0	1						M7S14	0	0	0	0	0	0	0	0	0	0	0	0
	M7S15	0.0766667	0	0	0	0	0.00666667	0.0166667	0	0	0	0	0	0.00666667	0	0	0	0	0.00666667	0.366667	0.00333333	0.0833333	0.05	0.00333333	0	0	0.00333333	0	0	0	0.623333						M7S15	12.2995	0	0	0	0	1.06952	2.6738	0	0	0	0	0
	M7S16	0.0166667	0	0	0	0	0	0.00333333	0	0	0	0	0	0.0133333	0	0.00333333	0	0.00333333	0.0133333	0.116667	0	0.0166667	0.0566667	0	0	0	0	0	0.183333	0	0.426667						M7S16	3.90625	0	0	0	0	0	0.78125	0	0	0	0	0
	M7S17	0	0	0	0	0	0	0	0	0	0	0	0	0	0	0	0	0	0	0	0.936667	0	0	0	0	0	0	0	0	0	0.936667						M7S17	0	0	0	0	0	0	0	0	0	0	0	0
	M7S18	0.03	0	0	0	0	0.00666667	0	0	0	0	0	0	0.00333333	0	0	0	0	0.00333333	0.416667	0.01	0.0266667	0.03	0	0	0	0.00333333	0	0	0	0.53						M7S18	5.66038	0	0	0	0	1.25786	0	0	0	0	0	0
	M7S19	0.183333	0	0	0	0	0.01	0	0	0	0	0	0.02	0.01	0	0	0.0133333	0	0.00666667	0.263333	0.0266667	0.0433333	0.0833333	0	0	0	0	0	0	0	0.66						M7S19	27.7778	0	0	0	0	1.51515	0	0	0	0	0	3.0303
	M7S21	0.00666667	0	0	0	0	0.01	0	0	0	0	0	0	0	0	0	0	0	0	0.136667	0.31	0	0.00666667	0	0.00666667	0	0	0	0	0	0.476667						M7S21	1.3986	0	0	0	0	2.0979	0	0	0	0	0	0
	M7S22	0.01	0	0	0	0	0.0133333	0	0	0	0	0	0.00666667	0	0	0.00333333	0.00333333	0	0.00666667	0.113333	0.2	0.00333333	0.02	0	0	0	0	0	0	0	0.38						M7S22	2.63158	0	0	0	0	3.50877	0	0	0	0	0	1.75439
	M7S23	0.01	0	0	0	0	0.00333333	0	0	0	0	0	0	0.00333333	0	0	0	0	0.00666667	0.233333	0.15	0.0333333	0.0133333	0	0	0	0	0	0	0	0.453333						M7S23	2.20588	0	0	0	0	0.735294	0	0	0	0	0	0
	M8S1	0.0266667	0	0	0	0	0.0133333	0.0133333	0	0	0	0	0	0.00333333	0	0.00333333	0.00333333	0	0	0.13	0.473333	0.0266667	0.0466667	0	0	0	0	0	0	0	0.74						M8S1	3.6036	0	0	0	0	1.8018	1.8018	0	0	0	0	0
	M8S2	0.0366667	0	0	0	0	0	0	0	0	0	0	0	0.00666667	0	0	0	0	0.00333333	0.36	0.163333	0.0966667	0.0433333	0	0	0	0	0	0	0	0.71						M8S2	5.16432	0	0	0	0	0	0	0	0	0	0	0
	M8S3	0.06	0	0	0	0	0	0.0133333	0	0	0	0	0	0.0133333	0	0.00333333	0	0	0.00666667	0.323333	0.0233333	0.0433333	0.136667	0	0	0	0	0	0	0	0.623333						M8S3	9.62567	0	0	0	0	0	2.13904	0	0	0	0	0
	M8S4	0.04	0	0	0	0	0.00666667	0.0233333	0	0	0	0	0	0	0	0.00333333	0	0	0	0.323333	0.00333333	0.11	0.0966667	0.00333333	0	0	0	0	0.00333333	0	0.613333						M8S4	6.52174	0	0	0	0	1.08696	3.80435	0	0	0	0	0
	M8S5	0	0	0	0	0	0.01	0.01	0	0	0	0	0	0	0	0	0	0	0.01	0.22	0.44	0	0.01	0	0	0	0.02	0	0	0	0.72						M8S5	0	0	0	0	0	1.38889	1.38889	0	0	0	0	0
	M8S6	0.01	0	0	0	0	0	0.01	0	0	0	0	0.01	0	0	0	0	0	0	0.29	0.22	0.02	0.02	0	0	0	0	0	0	0	0.58						M8S6	1.72414	0	0	0	0	0	1.72414	0	0	0	0	1.72414
	M8S7	0.01	0	0	0	0	0.01	0	0	0	0	0	0	0	0	0	0.01	0	0.01	0.2	0.17	0	0.02	0	0	0	0	0	0	0	0.43						M8S7	2.32558	0	0	0	0	2.32558	0	0	0	0	0	0
	M8S8	0.0533333	0	0	0.00666667	0	0.01	0.0333333	0	0	0	0	0	0.0133333	0	0	0	0	0.00333333	0.373333	0.02	0.04	0.03	0	0	0	0.01	0	0	0	0.593333						M8S8	8.98876	0	0	1.1236	0	1.68539	5.61798	0	0	0	0	0
	M8S9	0.05	0	0	0	0	0	0.00666667	0	0	0	0	0	0.00333333	0	0	0.00333333	0	0	0.313333	0.223333	0	0.00666667	0	0	0	0.01	0	0	0	0.616667						M8S9	8.10811	0	0	0	0	0	1.08108	0	0	0	0	0
	M8S10	0.0133333	0	0	0	0	0	0.0166667	0	0	0	0	0	0	0	0	0.00666667	0	0.01	0.26	0.243333	0.00666667	0.06	0.0166667	0	0	0.00333333	0	0	0	0.636667						M8S10	2.09424	0	0	0	0	0	2.6178	0	0	0	0	0
	M8S11	0.09	0	0	0	0	0	0.0266667	0	0	0	0	0.00333333	0.01	0	0	0.00333333	0	0.00666667	0.273333	0.123333	0.0333333	0.05	0	0	0	0	0	0	0	0.62						M8S11	14.5161	0	0	0	0	0	4.30108	0	0	0	0	0.537634
	M8S12	0.103333	0	0	0	0	0.0133333	0.01	0	0	0	0	0	0.01	0	0	0.00333333	0	0.01	0.11	0.166667	0.02	0.06	0	0	0	0.06	0	0	0	0.566667						M8S12	18.2353	0	0	0	0	2.35294	1.76471	0	0	0	0	0
	M8S15	0.0166667	0	0	0	0	0.00333333	0.0133333	0	0	0	0	0.00333333	0	0	0.00333333	0.00666667	0	0.00666667	0.276667	0.0133333	0.0366667	0.02	0	0	0	0.00666667	0	0.15	0	0.556667						M8S15	2.99401	0	0	0	0	0.598802	2.39521	0	0	0	0	0.598802
	M8S16	0.0866667	0	0	0.01	0	0.03	0.00666667	0	0	0	0	0.00666667	0.00666667	0	0	0.00333333	0	0.00333333	0.316667	0.0233333	0.0566667	0.136667	0.02	0	0	0.0133333	0	0	0	0.72						M8S16	12.037	0	0	1.38889	0	4.16667	0.925926	0	0	0	0	0.925926
	M8S17	0.0333333	0	0	0.00333333	0	0.0233333	0.0133333	0	0	0	0	0	0.04	0	0	0.00333333	0	0.0233333	0.253333	0.08	0.0166667	0.08	0	0.01	0	0.01	0	0.00333333	0	0.593333						M8S17	5.61798	0	0	0.561798	0	3.93258	2.24719	0	0	0	0	0
	M8S18	0.0833333	0	0	0	0	0.0333333	0	0	0	0	0	0	0	0	0.00333333	0	0	0.0233333	0.38	0.0133333	0.0366667	0.04	0.00333333	0.01	0	0.01	0	0.0166667	0	0.653333						M8S18	12.7551	0	0	0	0	5.10204	0	0	0	0	0	0
	M8S20	0.0133333	0	0	0.00333333	0	0.01	0.0133333	0	0	0	0	0	0.00333333	0	0	0	0	0.00333333	0.126667	0.193333	0.0133333	0.04	0.00333333	0	0	0.00333333	0	0.00333333	0	0.43						M8S20	3.10078	0	0	0.775194	0	2.32558	3.10078	0	0	0	0	0
	M8S22	0.04	0.00666667	0	0.00333333	0	0.01	0.01	0	0	0	0	0	0	0	0	0	0	0	0.216667	0.36	0.00666667	0.06	0	0	0	0	0	0	0	0.713333						M8S22	5.60748	0.934579	0	0.46729	0	1.40187	1.40187	0	0	0	0	0
	M8S23	0.0133333	0.01	0	0	0	0	0.0133333	0	0	0	0	0	0	0	0	0	0	0.00333333	0.22	0.0833333	0	0.09	0	0	0	0.0266667	0	0	0	0.46						M8S23	2.89855	2.17391	0	0	0	0	2.89855	0	0	0	0	0
	M8S24	0.00666667	0	0	0	0.03	0.0133333	0.143333	0	0	0	0	0	0	0	0	0.00333333	0	0.00666667	0.243333	0.11	0.0333333	0.0366667	0	0	0	0	0	0	0	0.626667						M8S24	1.06383	0	0	0	4.78723	2.12766	22.8723	0	0	0	0	0
	M8S25	0	0	0	0	0.01	0.0866667	0.253333	0	0	0	0	0	0	0	0	0	0	0	0.263333	0	0.07	0	0	0	0	0	0.01	0	0	0.693333						M8S25	0	0	0	0	1.44231	12.5	36.5385	0	0	0	0	0
	M8S26	0	0	0	0	0.01	0.0166667	0.133333	0	0	0	0	0	0	0	0.02	0.01	0.00666667	0.00333333	0.26	0	0.09	0.00333333	0	0	0	0	0.0133333	0	0	0.566667						M8S26	0	0	0	0	1.76471	2.94118	23.5294	0	0	0	0	0
	M8S29	0.01	0	0	0.00666667	0	0.02	0.00666667	0	0	0	0	0	0.01	0	0.00333333	0	0	0.00333333	0.06	0	0.0233333	0.01	0	0	0	0	0	0.12	0	0.273333						M8S29	3.65854	0	0	2.43902	0	7.31707	2.43902	0	0	0	0	0
	M8S30	0.07	0.00333333	0	0	0	0.01	0.00666667	0	0	0	0	0	0.0233333	0	0.0166667	0	0	0.00333333	0.166667	0	0.01	0.0833333	0	0	0	0.0133333	0	0	0	0.406667						M8S30	17.2131	0.819672	0	0	0	2.45902	1.63934	0	0	0	0	0
	M8S31	0.0133333	0	0	0	0	0.00333333	0.00333333	0	0	0.00333333	0	0	0	0	0	0.00666667	0	0	0.0866667	0.0666667	0.0166667	0.0133333	0	0	0	0	0	0.00333333	0	0.216667						M8S31	6.15385	0	0	0	0	1.53846	1.53846	0	0	1.53846	0	0
	M8S32	0.05	0.0266667	0	0	0	0.0166667	0.0433333	0	0	0	0	0	0.00666667	0	0.00333333	0.00333333	0	0	0.156667	0.226667	0.02	0.0933333	0.0233333	0	0	0.00333333	0	0	0	0.673333						M8S32	7.42574	3.9604	0	0	0	2.47525	6.43564	0	0	0	0	0
	M8S33b	0.0233333	0.01	0	0	0	0.00333333	0.01	0	0	0	0	0	0	0	0	0	0	0.0133333	0.186667	0.136667	0.01	0.123333	0	0	0	0.01	0	0	0	0.526667						M8S33b	4.43038	1.89873	0	0	0	0.632911	1.89873	0	0	0	0	0
	M8S34	0.00333333	0	0	0	0	0.00333333	0.02	0	0	0	0	0	0.00666667	0	0	0	0.00333333	0.00666667	0.28	0.0766667	0.00666667	0.0866667	0	0	0	0.03	0	0	0	0.523333						M8S34	0.636943	0	0	0	0	0.636943	3.82166	0	0	0	0	0
	M8S35	0.0133333	0.01	0	0.03	0.196667	0.04	0.106667	0	0	0	0	0	0	0	0	0	0	0	0.193333	0.0166667	0.0266667	0.01	0	0	0	0	0.00666667	0	0	0.65						M8S35	2.05128	1.53846	0	4.61538	30.2564	6.15385	16.4103	0	0	0	0	0
	M8S43	0.00666667	0	0	0.01	0.0933333	0.0333333	0.03	0	0	0	0	0	0	0	0.00666667	0	0	0	0.356667	0	0.0866667	0.00333333	0.00666667	0	0	0.00333333	0.02	0	0	0.656667						M8S43	1.01523	0	0	1.52284	14.2132	5.07614	4.56853	0	0	0	0	0
	M8S54	0	0	0	0.0233333	0.0566667	0.0533333	0.0233333	0	0	0	0	0	0	0	0.00333333	0	0	0	0.486667	0	0.156667	0.00333333	0	0	0	0	0.00666667	0	0	0.813333						M8S54	0	0	0	2.86885	6.96721	6.55738	2.86885	0	0	0	0	0
	M8S55	0	0	0	0.02	0.253333	0.0166667	0.0233333	0	0	0	0	0	0	0	0.00333333	0	0	0	0.32	0	0.03	0	0	0	0	0	0	0	0	0.666667						M8S55	0	0	0	3	38	2.5	3.5	0	0	0	0	0
	M8S56	0	0	0	0.03	0.136667	0.0633333	0.05	0	0	0	0	0	0	0	0	0	0	0	0.46	0	0.0666667	0.02	0	0	0	0	0.0266667	0	0	0.853333						M8S56	0	0	0	3.51563	16.0156	7.42188	5.85938	0	0	0	0	0
	M8S57a	0	0	0	0.0233333	0.12	0.0266667	0.0333333	0	0	0	0	0	0	0	0	0	0	0	0.513333	0	0.0966667	0.01	0	0	0	0	0.02	0	0	0.843333						M8S57a	0	0	0	2.7668	14.2292	3.16206	3.95257	0	0	0	0	0
	M8S57b	0	0	0	0.0333333	0.18	0.06	0.0433333	0	0	0	0	0	0	0	0	0	0	0	0.393333	0.0366667	0.123333	0.0133333	0	0	0	0	0.0133333	0	0	0.896667						M8S57b	0	0	0	3.71747	20.0743	6.69145	4.83271	0	0	0	0	0
	CANAL_14-2	0.02	0	0	0.0366667	0.153333	0.01	0.0333333	0	0	0	0	0	0	0	0.00666667	0	0	0	0.303333	0	0.0666667	0.0333333	0.0366667	0	0	0	0.02	0	0	0.72						CANAL_14-2	2.77778	0	0	5.09259	21.2963	1.38889	4.62963	0	0	0	0	0
	CANAL_16-1	0.0266667	0	0	0.0433333	0.0566667	0.0366667	0.0566667	0	0	0	0	0	0.0133333	0	0.02	0	0	0.00333333	0.233333	0	0.193333	0.0133333	0	0	0	0	0	0	0	0.696667						CANAL_16-1	3.82775	0	0	6.2201	8.13397	5.26316	8.13397	0	0	0	0	0
	CANAL_18-1	0.0233333	0	0	0.03	0.0533333	0.0233333	0.03	0	0	0	0	0	0	0	0.01	0	0	0	0.376667	0	0.176667	0.0533333	0	0	0	0	0	0	0	0.776667						CANAL_18-1	3.00429	0	0	3.86266	6.86695	3.00429	3.86266	0	0	0	0	0
	CANAL_19-1	0	0	0	0	0.0133333	0.01	0.0666667	0	0	0	0	0	0	0	0.0166667	0	0	0	0.223333	0	0.09	0.02	0	0	0	0	0	0	0	0.44						CANAL_19-1	0	0	0	0	3.0303	2.27273	15.1515	0	0	0	0	0
	marmo 1	0.0133333	0	0	0	0	0.0233333	0.00666667	0	0	0	0.00333333	0	0	0	0.00333333	0.00666667	0	0.0133333	0.14	0.386667	0.0366667	0.00666667	0	0	0	0	0	0	0	0.64						marmo 1	2.08333	0	0	0	0	3.64583	1.04167	0	0	0	0.520833	0
	marmo 2	0	0	0	0	0	0	0	0	0	0	0	0	0	0	0.0133333	0	0	0.00666667	0.136667	0	0.03	0	0	0	0	0	0	0.22	0	0.406667						marmo 2	0	0	0	0	0	0	0	0	0	0	0	0
	marmo 3	0.06	0.00666667	0	0	0	0.0166667	0.06	0	0	0	0	0	0	0	0	0.00333333	0	0.01	0.283333	0.0633333	0.0566667	0.0233333	0	0	0	0	0	0	0	0.583333						marmo 3	10.2857	1.14286	0	0	0	2.85714	10.2857	0	0	0	0	0
	marmo.2	0.0666667	0	0	0	0	0.0166667	0.0266667	0	0	0	0	0	0.00333333	0	0	0	0	0.00333333	0.346667	0.0333333	0.04	0.0566667	0	0	0	0.01	0	0	0	0.603333						marmo.2	11.0497	0	0	0	0	2.76243	4.41989	0	0	0	0	0
	marmo.5	0	0	0	0.00333333	0.0433333	0.0133333	0.0166667	0	0.00333333	0	0	0	0	0	0	0.00333333	0	0	0.593333	0	0.0366667	0.00666667	0	0	0	0	0	0	0	0.72						marmo.5	0	0	0	0.462963	6.01852	1.85185	2.31481	0	0.462963	0	0	0
	marmo.6	0	0	0	0	0.0266667	0.00666667	0.00333333	0	0	0	0	0	0.00333333	0	0	0	0	0	0.536667	0	0	0	0	0	0	0.00333333	0.00666667	0	0	0.586667						marmo.6	0	0	0	0	4.54545	1.13636	0.568182	0	0	0	0	0
	copia
	samples	Nummulites	Heterostegina	Spiroclypeus	Operculina	Lepidocyclinids	Amphistegina	Neorotalia	Risananeiza	Austrotrillina	Borelis	Peneroplis	Sorites	Acervulina	Victoriellids	Planorbulinids	Rotaliids	Miliolids	Textulariids	CA Geniculates	CCA	Corals	Bivalves	Brachiopods	Barnacles			Echinoderms	Bryozoans	Serpulids	Quartz	Planktonic foraminifera	Discocyclina
	M1S1'	0.103333	0	0	0	0	0.0133333	0	0	0	0	0	0	0	0.01	0	0	0.0133333	0.00333333	0	0.22	0.0266667	0.00666667	0	0.00333333			0.0133333	0.02	0	0	0	0
	M1S2	0.00666667	0	0	0	0	0	0	0	0	0	0	0	0	0	0	0.00333333	0	0	0	0.14	0.283333	0	0	0			0	0.00333333	0	0	0	0
	M1S3	0.106667	0.00333333	0	0	0	0.0233333	0.02	0	0	0	0	0	0	0.01	0	0	0	0	0.00666667	0.316667	0.0166667	0.00666667	0	0			0.05	0.0333333	0	0	0.0133333	0
	M1S4	0.0433333	0	0	0	0	0.00666667	0.00333333	0	0	0	0	0	0	0	0.00333333	0	0.00333333	0	0	0.31	0.313333	0	0	0			0.0366667	0.0233333	0	0	0	0
	M1S5 I	0.08	0.00333333	0	0	0	0.0133333	0.00666667	0	0	0	0	0	0	0.00333333	0	0	0	0	0.00333333	0.176667	0.253333	0.00333333	0	0			0.0133333	0.00666667	0	0	0	0
	M1S6	0.0733333	0.00333333	0	0.00333333	0	0	0.0166667	0	0	0	0	0	0	0.03	0	0	0	0.00333333	0.00333333	0.303333	0.07	0.00333333	0	0			0.0166667	0.0266667	0	0	0.00666667	0
	M1S7	0	0	0	0	0	0.00333333	0	0	0	0	0	0	0	0	0	0.0133333	0	0	0	0.213333	0	0	0	0			0.0333333	0	0	0	0.146667	0
	M1S10	0.0133333	0.0133333	0	0	0	0.0166667	0.0766667	0	0	0.00333333	0	0	0	0	0	0.0233333	0.00333333	0	0	0.243333	0.04	0	0	0			0.00666667	0.03	0.00333333	0.00666667	0	0
	M1S11	0.1	0.00333333	0	0	0	0.0166667	0.0166667	0	0	0	0	0	0	0	0	0	0.00666667	0	0	0.223333	0.09	0.00333333	0	0			0.03	0.0366667	0.00333333	0	0	0
	M1S14	0	0	0	0.0566667	0.116667	0.00333333	0	0	0	0	0	0	0	0	0	0	0	0.01	0	0.1	0	0.00333333	0	0			0.00333333	0.03	0	0.02	0.02	0
	M1S15b	0.0166667	0.00333333	0	0.0133333	0.0166667	0	0	0	0	0	0	0	0	0	0	0.03	0	0	0	0.18	0.03	0.00333333	0	0			0.0233333	0.01	0	0.02	0.00333333	0
	M1S16a	0.00666667	0	0	0.0333333	0.0633333	0.0233333	0.03	0	0	0	0	0	0	0.00333333	0	0	0	0	0	0.19	0	0	0	0			0.02	0.0166667	0	0.0466667	0.00666667	0
	M1S16b	0.00333333	0	0	0.0166667	0.0566667	0.0166667	0.08	0	0	0	0	0	0	0.00333333	0	0.0566667	0	0	0	0.196667	0	0	0	0			0.0133333	0.02	0.00333333	0.0433333	0	0
	M2S1	0	0	0	0.0133333	0.0433333	0.0433333	0.0533333	0	0	0	0	0	0	0	0	0.03	0	0	0	0.256667	0	0	0	0			0.01	0	0	0.0233333	0	0
	M2S2I	0	0	0	0.02	0.0333333	0.0166667	0.0766667	0	0	0	0	0	0	0	0	0.0233333	0	0	0	0.196667	0	0	0	0			0.00666667	0.00333333	0	0.0266667	0	0
	M2S3	0	0	0	0.0966667	0.05	0.04	0.0166667	0	0	0	0	0	0	0	0	0	0	0	0	0.203333	0	0.00333333	0	0			0.02	0.00666667	0	0.0133333	0	0
	M2S10	0.00333333	0	0	0.0966667	0.05	0.04	0.0366667	0	0	0	0	0	0	0	0	0.0166667	0	0	0	0.213333	0	0	0	0			0.0233333	0.0266667	0	0.01	0	0
	M2S12B	0	0	0	0.0133333	0.06	0.0333333	0.04	0	0	0	0	0	0	0	0.00333333	0.02	0	0	0	0.35	0.00666667	0	0	0			0.03	0.00666667	0	0.0133333	0	0
	M2S12C	0	0	0	0.00333333	0.0533333	0	0.0233333	0	0	0	0	0	0	0	0	0.00333333	0	0	0	0.35	0	0	0	0			0.0166667	0.05	0	0	0	0
	M2S13	0	0	0	0.0266667	0.15	0.0166667	0.05	0	0	0	0	0	0	0.01	0	0	0	0	0	0.38	0	0	0	0			0.01	0.02	0	0.00666667	0	0
	M3S2	0	0	0	0	0	0.00333333	0.0333333	0	0	0.00333333	0	0	0	0.00333333	0	0.0266667	0.06	0.00333333	0.00333333	0.33	0	0	0	0			0.0666667	0.0266667	0	0	0	0
	M3S3	0	0	0	0.01	0.0233333	0.0366667	0.06	0	0	0.00333333	0.00666667	0	0	0.02	0.01	0.0166667	0.03	0.00333333	0.00333333	0.2	0	0	0	0			0.06	0.00666667	0	0.0166667	0	0
	M3S4	0	0	0	0.0166667	0	0.00333333	0.0633333	0	0	0	0	0	0	0.0533333	0.0166667	0.0333333	0	0.00333333	0.00333333	0.226667	0	0	0	0			0.13	0.0166667	0	0	0	0
	M3S5	0	0	0	0.00333333	0	0.01	0.196667	0	0	0	0	0	0	0.0166667	0.00666667	0.0333333	0.0166667	0.00666667	0.00333333	0.106667	0	0	0	0			0.0433333	0.00333333	0	0.00333333	0	0
	M3S6	0	0	0	0.02	0.00666667	0.01	0.0566667	0	0.00333333	0	0	0	0	0.0333333	0	0.02	0.0133333	0.0166667	0.0233333	0.163333	0	0	0	0			0.0533333	0	0	0.0233333	0	0
	M3S10	0	0	0	0	0	0	0	0	0.00333333	0	0.00666667	0	0	0.0133333	0	0.0133333	0.03	0.00333333	0	0.163333	0.36	0	0	0			0.00333333	0	0	0	0	0
	M3S11	0	0	0	0	0	0	0	0	0	0	0	0	0	0	0	0	0	0	0	0.03	0.896667	0	0	0			0	0	0	0	0	0
	M3S12	0	0	0	0	0	0	0.00666667	0	0	0	0	0	0	0	0	0	0.00333333	0.00666667	0	0.293333	0.106667	0	0	0			0.00333333	0.00666667	0.00666667	0	0	0
	M3S13	0	0.00666667	0	0.0233333	0.02	0.02	0.0533333	0.0166667	0	0	0	0	0	0	0	0.01	0.00333333	0	0.00333333	0.193333	0.0666667	0	0	0			0.0566667	0.0166667	0.00333333	0	0	0
	M3S14-I	0	0	0	0	0	0	0	0	0	0	0	0	0	0	0	0	0	0	0	0.0633333	0.836667	0	0	0			0	0	0	0	0	0
	M3S15	0	0	0	0	0	0.00666667	0.0466667	0	0.00333333	0.00333333	0.00333333	0	0	0.00666667	0	0	0.01	0	0	0.163333	0.07	0	0	0			0	0	0	0	0	0
	M3S16	0	0.00333333	0	0	0.00666667	0.00666667	0.02	0.0233333	0	0	0.00333333	0.00666667	0	0.01	0.00333333	0.0133333	0.0233333	0	0.00666667	0.116667	0.0633333	0	0.00333333	0			0.00666667	0.00666667	0	0	0	0
	M3S17	0	0	0	0	0	0	0	0	0	0	0	0	0	0.00666667	0.00333333	0.00333333	0.00333333	0.00333333	0.00333333	0.0233333	0.796667	0	0	0			0.00666667	0	0	0	0	0
	M3S18	0	0.00666667	0	0.00333333	0.0166667	0.00333333	0.0133333	0.0133333	0.00333333	0	0	0	0	0	0.00333333	0.0133333	0.0233333	0.00333333	0.00666667	0.16	0.0466667	0	0	0			0.0133333	0.0266667	0.00666667	0.00333333	0	0
	M4S1	0	0	0	0	0	0.01	0	0	0	0.00333333	0	0	0	0	0	0	0.01	0	0.01	0.14	0.226667	0.01	0	0			0.0233333	0	0	0	0	0
	M4S7	0	0	0	0	0.00333333	0.00666667	0.193333	0	0	0	0	0	0	0	0	0.00666667	0.0166667	0.00666667	0.01	0.3	0	0	0	0			0.12	0.00666667	0	0	0	0
	M4S8	0	0	0	0	0	0.00333333	0.12	0	0	0	0	0	0	0	0.00333333	0.0133333	0.00333333	0	0.00333333	0.276667	0	0	0	0			0.113333	0.0366667	0	0	0	0
	M4S9	0	0.0133333	0	0	0.02	0.0133333	0.173333	0	0.00333333	0	0	0	0	0.00666667	0	0.0166667	0	0	0.00666667	0.19	0	0	0	0			0.193333	0.0266667	0	0	0	0
	M4S10	0	0.01	0	0.01	0.01	0.0133333	0.0566667	0.0566667	0.00666667	0	0	0.00666667	0	0	0	0.0166667	0.06	0.00333333	0.00666667	0.246667	0.05	0	0	0			0.01	0.0166667	0.01	0	0.00333333	0
	M4S11	0	0	0	0	0.00333333	0.00333333	0.02	0.0166667	0.00666667	0	0.00333333	0	0	0.01	0	0.00666667	0.0266667	0.0133333	0.0233333	0.0633333	0.36	0.0166667	0	0			0.03	0.0266667	0	0.00333333	0.00666667	0
	M5S3	0	0	0	0.00333333	0.00333333	0.00666667	0.00666667	0.01	0	0	0	0	0	0	0	0	0	0	0	0.103333	0	0.01	0	0			0.143333	0.0933333	0	0.0133333	0	0
	M5S4a	0	0.00333333	0	0	0.0466667	0.0133333	0.02	0.0433333	0	0	0	0	0	0	0	0	0.00333333	0	0	0.206667	0	0.00333333	0	0			0.0266667	0.0766667	0.00333333	0.0166667	0	0
	M5S4b	0	0.00333333	0	0	0.0333333	0.00333333	0	0.0333333	0	0	0	0	0	0	0	0	0.0133333	0	0	0.166667	0	0.00666667	0	0			0.02	0.0366667	0	0.02	0.00333333	0
	M5S5	0	0.00333333	0	0	0	0.00333333	0.136667	0.0233333	0	0	0	0	0	0	0	0	0.00666667	0	0	0.19	0	0	0	0			0.0466667	0.00666667	0	0.0166667	0	0
	M5S6	0	0.00333333	0	0	0	0.01	0.32	0.04	0	0	0	0	0	0	0.00333333	0	0.00333333	0.00333333	0.00666667	0.16	0	0.00333333	0	0			0.04	0.00333333	0.01	0.00333333	0	0
	M5S7	0	0.0233333	0	0	0	0	0	0.0333333	0	0	0	0	0	0	0	0	0.00666667	0	0	0.173333	0.126667	0	0	0			0.06	0.0266667	0	0.00666667	0	0
	M5S8	0	0.0166113	0.013289	0	0	0.00332226	0.00664452	0.0199336	0.00664452	0	0	0	0	0	0	0	0.00996678	0	0	0.186047	0.0365449	0.00664452	0	0			0.0465116	0	0	0.00996678	0	0
	M5S10	0	0	0	0	0	0.00333333	0.0133333	0.0133333	0.00666667	0	0	0	0	0	0	0	0.00333333	0	0	0.276667	0.06	0.00333333	0	0			0.05	0	0.0533333	0	0	0
	M5S11	0	0.0166667	0	0	0	0	0.0233333	0.0366667	0	0.00666667	0.00333333	0	0	0	0	0	0	0	0.00333333	0.236667	0.09	0.00333333	0	0			0.0333333	0	0	0	0	0
	M5S12	0	0	0	0	0	0	0.02	0.03	0	0	0	0	0	0	0.00333333	0	0.00333333	0	0.0133333	0.103333	0	0.00333333	0	0			0.0266667	0.00333333	0	0.0233333	0	0
	M5S14	0	0	0	0	0	0.00666667	0	0	0	0	0	0	0.00333333	0	0	0.02	0.00333333	0.00333333	0.00666667	0.24	0	0.0133333	0	0.0633333			0.03	0.00333333	0.00333333	0.253333	0.0133333	0
	M5S14bis	0	0	0	0	0	0.00666667	0	0	0	0	0	0	0.06	0	0	0.00666667	0	0.01	0.00333333	0.646667	0	0	0	0			0.01	0.00333333	0.0133333	0.0266667	0	0
	M5S15	0	0	0	0	0	0.0166667	0	0	0	0	0	0	0.0133333	0	0	0.0166667	0	0	0.00333333	0.346667	0	0.03	0	0.00666667			0.03	0.0166667	0.01	0.146667	0.01	0
	M6S1	0.0533333	0	0	0	0	0.0166667	0	0	0	0	0	0	0	0	0	0	0	0	0	0.163333	0.0333333	0	0	0			0.0333333	0.0433333	0	0	0	0
	M6S2	0	0	0	0	0	0	0	0	0	0	0	0	0	0	0	0	0	0	0	0	0	0	0	0			0.0233333	0	0	0	0.156667	0
	M6S3	0.00333333	0	0	0	0	0.00666667	0.0333333	0	0	0	0.00666667	0	0	0.00666667	0	0	0	0	0.0333333	0.416667	0	0	0	0			0.123333	0.09	0	0	0.00333333	0
	M6S4	0	0	0	0	0	0	0	0	0	0	0	0	0	0	0	0	0.00333333	0	0	0.116667	0.24	0	0	0			0.00666667	0.0166667	0	0	0	0
	M6S5	0	0	0	0	0	0	0.0866667	0	0	0	0	0	0	0	0.00333333	0	0.01	0	0	0.16	0.486667	0	0	0			0.0766667	0.03	0	0	0	0
	M6S6	0.03	0	0	0	0.01	0.01	0.0266667	0	0	0	0	0	0	0.0366667	0	0	0	0	0.0133333	0.246667	0.123333	0	0	0			0.0533333	0.0666667	0	0	0	0
	M6S7	0.0666667	0	0	0	0	0.00333333	0.01	0	0	0	0	0	0	0	0	0	0.00333333	0	0	0.243333	0.216667	0	0	0			0.0233333	0.03	0	0	0	0
	M6S8	0.0166667	0	0	0	0	0.00666667	0	0	0	0	0	0	0	0.02	0	0	0.00333333	0	0.00333333	0.253333	0.243333	0	0	0			0.04	0.03	0	0	0	0
	M6S9	0.15	0	0	0	0	0.0266667	0.0666667	0	0	0	0	0	0	0.01	0	0	0	0	0.00333333	0.34	0.0233333	0	0	0			0.106667	0.0533333	0	0	0	0
	M6S10	0	0	0	0.0233333	0.0933333	0.0166667	0.0133333	0	0	0	0.00333333	0	0	0	0	0.01	0	0.00333333	0	0.506667	0	0	0	0			0.163333	0.01	0	0.0166667	0	0
	M6S11	0	0	0	0	0	0	0	0	0	0	0	0	0	0	0	0	0	0	0	0.11	0.496667	0	0	0			0	0.01	0	0	0	0
	M6S12	0.0566667	0	0	0	0	0.00666667	0.02	0	0	0	0	0	0	0.0233333	0	0	0	0	0.00333333	0.25	0.02	0	0	0			0.09	0.06	0.00333333	0	0	0
	M6S13	0.0866667	0	0	0	0	0	0	0	0	0	0	0	0	0	0	0	0.00333333	0	0.00333333	0.273333	0.02	0	0	0			0.0333333	0.0833333	0	0	0	0
	M6S14	0.0633333	0	0	0	0	0	0.00666667	0	0	0	0	0	0	0	0	0	0	0	0	0.236667	0.0533333	0	0	0			0.0766667	0.0433333	0.04	0	0	0
	M6S15	0	0	0	0	0	0	0.00333333	0	0	0	0	0	0	0	0	0.00333333	0.00333333	0	0.0333333	0.22	0.0733333	0	0	0			0.0166667	0	0	0	0	0
	M6S16	0.146667	0	0	0	0	0.00333333	0.0133333	0	0	0	0.00333333	0	0	0	0	0	0.00666667	0	0.00666667	0.223333	0.03	0	0	0			0.02	0.00666667	0	0	0	0.01
	M6S17	0.04	0.00666667	0	0	0	0.0166667	0.0233333	0	0	0	0	0	0	0.00666667	0	0	0	0	0	0.243333	0.103333	0	0	0			0.05	0.01	0	0	0	0
	M6S18	0.15	0.0133333	0	0	0	0.0133333	0.00666667	0	0	0	0	0	0	0	0	0.00666667	0.00666667	0	0	0.32	0.00333333	0	0	0			0.05	0.06	0.00666667	0	0	0
	M6S19	0.0133333	0	0	0	0	0.00333333	0.00333333	0	0	0	0	0	0	0	0	0	0	0	0	0.0566667	0.823333	0	0	0			0.0133333	0	0	0	0	0
	M6S20	0	0	0	0	0	0	0.0133333	0	0	0	0	0	0	0	0	0	0	0	0	0.113333	0.723333	0	0	0.01			0	0.01	0	0	0	0
	M6S23	0.103333	0	0	0	0	0.01	0.0166667	0	0	0.00333333	0	0	0	0.00333333	0	0	0	0	0.00333333	0.27	0.236667	0	0	0			0.0333333	0	0	0	0	0
	M6S24	0.00666667	0	0	0	0	0.00333333	0.02	0	0	0	0.00333333	0	0	0.0133333	0	0.00666667	0	0	0	0.196667	0	0	0	0			0.09	0.0233333	0	0	0	0
	M6S25	0	0	0	0	0	0.00333333	0	0	0	0	0	0	0	0	0	0	0	0.00333333	0	0.09	0.173333	0	0	0			0.01	0.01	0	0	0	0
	M6S26	0	0	0	0	0	0	0	0	0	0	0	0	0	0	0	0	0	0	0	0.09	0.736667	0	0	0			0	0	0	0	0	0
	M6S27	0.0366667	0	0	0	0	0.0266667	0.02	0	0	0	0	0	0	0	0	0	0	0	0.0133333	0.246667	0	0	0	0			0.0233333	0.0166667	0.00333333	0	0	0
	M6S28	0.08	0.01	0	0	0	0	0.04	0	0	0.00333333	0	0	0	0	0	0	0	0	0	0.296667	0	0	0	0			0.04	0.0266667	0	0	0	0
	M6S30	0	0	0	0	0.02	0.04	0.0266667	0	0	0	0	0	0	0	0	0	0	0	0	0.616667	0	0.00333333	0	0			0.01	0.00666667	0	0.0366667	0	0
	M7S1	0	0	0	0	0	0	0	0	0	0	0	0	0	0	0	0	0.00333333	0	0	0.256667	0.01	0	0	0			0.01	0	0	0	0	0.176667
	M7S2	0	0	0	0	0	0	0	0	0	0	0	0	0	0	0	0	0	0	0	0.516667	0.143333	0	0	0			0	0.00666667	0	0	0	0.00333333
	M7S3	0	0	0	0	0	0	0	0	0	0	0	0	0	0	0	0	0	0	0.00666667	0.41	0.18	0	0	0			0.0433333	0.123333	0	0	0	0.0133333
	M7S4	0	0	0	0	0	0	0	0	0	0	0	0	0	0.00333333	0	0	0.00666667	0	0.00333333	0.21	0.03	0.00666667	0	0			0	0.00333333	0	0	0	0.00333333
	M7S5	0	0	0	0	0	0	0	0	0	0	0	0	0	0	0	0	0	0	0	0.326667	0.02	0.02	0	0			0.06	0.0466667	0	0	0	0.00666667
	M7S6	0	0	0	0	0	0.01	0	0	0	0	0	0	0	0	0	0	0	0	0	0.306667	0.0666667	0	0	0			0.113333	0.0733333	0	0	0	0.01
	M7S7	0.01	0	0	0	0	0	0	0	0	0	0	0	0	0	0	0	0	0.00333333	0.00666667	0.186667	0.146667	0	0	0			0.02	0.02	0	0	0	0
	M7S9	0	0	0	0	0	0.01	0	0	0	0	0	0	0	0	0	0	0	0	0.00333333	0.32	0.14	0	0	0			0.03	0.05	0	0	0	0.0266667
	M7S10	0	0	0	0	0	0.01	0	0	0	0	0	0	0	0.00333333	0	0	0.00333333	0	0	0.316667	0.11	0	0	0			0.0233333	0.0466667	0	0	0.00333333	0.01
	M7S11	0	0	0	0	0	0.01	0	0	0	0	0	0	0	0	0	0	0	0	0	0.226667	0.353333	0	0	0			0.02	0.03	0	0	0.00333333	0.02
	M7S12	0	0	0	0	0	0	0.133333	0	0	0	0	0	0	0	0	0.01	0.0166667	0.00666667	0.0333333	0.296667	0	0	0	0			0.07	0.03	0	0	0.0133333	0
	M7S13	0.0633333	0	0	0	0	0.00666667	0.0166667	0	0	0	0	0	0	0.02	0	0.00333333	0	0.00333333	0.00333333	0.166667	0.196667	0	0	0			0.0166667	0.01	0	0	0	0
	M7S14	0	0	0	0	0	0	0	0	0	0	0	0	0	0	0	0	0	0	0	0	1	0	0	0			0	0	0	0	0	0
	M7S15	0.0766667	0	0	0	0	0.00666667	0.0166667	0	0	0	0	0	0	0.00666667	0	0	0	0	0.00666667	0.366667	0.00333333	0.00333333	0	0			0.0833333	0.05	0.00333333	0	0	0
	M7S16	0.0166667	0	0	0	0	0	0.00333333	0	0	0	0	0	0	0.0133333	0	0.00333333	0	0.00333333	0.0133333	0.116667	0	0	0	0			0.0166667	0.0566667	0	0	0.183333	0
	M7S17	0	0	0	0	0	0	0	0	0	0	0	0	0	0	0	0	0	0	0	0	0.936667	0	0	0			0	0	0	0	0	0
	M7S18	0.03	0	0	0	0	0.00666667	0	0	0	0	0	0	0	0.00333333	0	0	0	0	0.00333333	0.416667	0.01	0	0	0			0.0266667	0.03	0.00333333	0	0	0
	M7S19	0.183333	0	0	0	0	0.01	0	0	0	0	0	0	0.02	0.01	0	0	0.0133333	0	0.00666667	0.263333	0.0266667	0	0	0			0.0433333	0.0833333	0	0	0	0
	M7S21	0.00666667	0	0	0	0	0.01	0	0	0	0	0	0	0	0	0	0	0	0	0	0.136667	0.31	0	0.00666667	0			0	0.00666667	0	0	0	0
	M7S22	0.01	0	0	0	0	0.0133333	0	0	0	0	0	0	0.00666667	0	0	0.00333333	0.00333333	0	0.00666667	0.113333	0.2	0	0	0			0.00333333	0.02	0	0	0	0
	M7S23	0.01	0	0	0	0	0.00333333	0	0	0	0	0	0	0	0.00333333	0	0	0	0	0.00666667	0.233333	0.15	0	0	0			0.0333333	0.0133333	0	0	0	0
	M8S1	0.0266667	0	0	0	0	0.0133333	0.0133333	0	0	0	0	0	0	0.00333333	0	0.00333333	0.00333333	0	0	0.13	0.473333	0	0	0			0.0266667	0.0466667	0	0	0	0.00666667
	M8S2	0.0366667	0	0	0	0	0	0	0	0	0	0	0	0	0.00666667	0	0	0	0	0.00333333	0.36	0.163333	0	0	0			0.0966667	0.0433333	0	0	0	0
	M8S3	0	0	0	0	0	0	0	0	0	0	0	0	0	0.0133333	0	0.00333333	0	0	0.00666667	0.323333	0.0233333	0	0	0			0.0433333	0.136667	0	0	0	0.0233333
	M8S4	0.04	0	0	0	0	0.00666667	0.0233333	0	0	0	0	0	0	0	0	0.00333333	0	0	0	0.323333	0.00333333	0.00333333	0	0			0.11	0.0966667	0	0	0.00333333	0
	M8S5	0	0	0	0	0	0.01	0.01	0	0	0	0	0	0	0	0	0	0	0	0.01	0.22	0.44	0	0	0			0	0.01	0.02	0	0	0
	M8S6	0.01	0	0	0	0	0	0	0	0	0	0	0	0.01	0	0	0	0	0	0	0.29	0.22	0	0	0			0.02	0.02	0	0	0	0
	M8S7	0.01	0	0	0	0	0.01	0	0	0	0	0	0	0	0	0	0	0.01	0	0.01	0.2	0.17	0	0	0			0	0.02	0	0	0	0
	M8S8	0.0533333	0	0	0.00666667	0	0.01	0.0333333	0	0	0	0	0	0	0.0133333	0	0	0	0	0.00333333	0.373333	0.02	0	0	0			0.04	0.03	0.01	0	0	0.00333333
	M8S9	0.05	0	0	0	0	0	0.00666667	0	0	0	0	0	0	0.00333333	0	0	0.00333333	0	0	0.313333	0.223333	0	0	0			0	0.00666667	0.01	0	0	0
	M8S10	0	0	0	0	0	0	0	0	0	0	0	0	0	0	0	0	0.00666667	0	0.01	0.26	0.243333	0.0166667	0	0			0.00666667	0.06	0.00333333	0	0	0.0133333
	M8S11	0.09	0	0	0	0	0	0.0266667	0	0	0	0	0	0.00333333	0.01	0	0	0.00333333	0	0.00666667	0.273333	0.123333	0	0	0			0.0333333	0.05	0	0	0	0
	M8S12	0.103333	0	0	0	0	0.0133333	0.01	0	0	0	0	0	0	0.01	0	0	0.00333333	0	0.01	0.11	0.166667	0	0	0			0.02	0.06	0.06	0	0	0
	M8S15	0.0166667	0	0	0	0	0.00333333	0.0133333	0	0	0	0	0	0.00333333	0	0	0.00333333	0.00666667	0	0.00666667	0.276667	0.0133333	0	0	0			0.0366667	0.02	0.00666667	0	0.15	0
	M8S16	0.0866667	0	0	0.01	0	0.03	0.00666667	0	0	0	0	0	0.00666667	0.00666667	0	0	0.00333333	0	0.00333333	0.316667	0.0233333	0.02	0	0			0.0566667	0.136667	0.0133333	0	0	0
	M8S17	0.0333333	0	0	0.00333333	0	0.0233333	0.0133333	0	0	0	0	0	0	0.04	0	0	0.00333333	0	0.0233333	0.253333	0.08	0	0.01	0			0.0166667	0.08	0.01	0	0.00333333	0
	M8S18	0.0833333	0	0	0	0	0.0333333	0	0	0	0	0	0	0	0	0	0.00333333	0	0	0.0233333	0.38	0.0133333	0.00333333	0.01	0			0.0366667	0.04	0.01	0	0.0166667	0
	M8S20	0.0133333	0	0	0.00333333	0	0.01	0.0133333	0	0	0	0	0	0	0.00333333	0	0	0	0	0.00333333	0.126667	0.193333	0.00333333	0	0			0.0133333	0.04	0.00333333	0	0.00333333	0
	M8S22	0.04	0.00666667	0	0.00333333	0	0.01	0.01	0	0	0	0	0	0	0	0	0	0	0	0	0.216667	0.36	0	0	0			0.00666667	0.06	0	0	0	0
	M8S23	0.0133333	0.01	0	0	0	0	0.0133333	0	0	0	0	0	0	0	0	0	0	0	0.00333333	0.22	0.0833333	0	0	0			0	0.09	0.0266667	0	0	0
	M8S24	0.00666667	0	0	0	0.03	0.0133333	0.143333	0	0	0	0	0	0	0	0	0	0.00333333	0	0.00666667	0.243333	0.11	0	0	0			0.0333333	0.0366667	0	0	0	0
	M8S25	0	0	0	0	0.01	0.0866667	0.253333	0	0	0	0	0	0	0	0	0	0	0	0	0.263333	0	0	0	0			0.07	0	0	0.01	0	0
	M8S26	0	0	0	0	0.01	0.0166667	0.133333	0	0	0	0	0	0	0	0	0.02	0.01	0.00666667	0.00333333	0.26	0	0	0	0			0.09	0.00333333	0	0.0133333	0	0
	M8S29	0.01	0	0	0.00666667	0	0.02	0.00666667	0	0	0	0	0	0	0.01	0	0.00333333	0	0	0.00333333	0.06	0.316667	0	0	0			0.0233333	0.01	0	0	0.12	0
	M8S30	0.07	0.00333333	0	0	0	0.01	0.00666667	0	0	0	0	0	0	0.0233333	0	0.0166667	0	0	0.00333333	0.166667	0	0	0	0			0.01	0.0833333	0.0133333	0	0	0
	M8S31	0.0133333	0	0	0	0	0.00333333	0.00333333	0	0	0.00333333	0	0	0	0	0	0	0.00666667	0	0	0.0866667	0.0666667	0	0	0			0.0166667	0.0133333	0	0	0.00333333	0
	M8S32A	0.05	0.0266667	0	0	0	0.0166667	0.0433333	0	0	0	0	0	0	0.00666667	0	0.00333333	0.00333333	0	0	0.156667	0.226667	0.0233333	0	0			0.02	0.0933333	0.00333333	0	0	0
	M8S32B	0.0133333	0.01	0	0	0	0.0466667	0.0866667	0	0	0	0	0.00333333	0	0	0	0.00333333	0.00333333	0.00333333	0	0.143333	0.04	0	0	0			0.04	0.0133333	0	0	0	0
	M8S33b	0.0233333	0.01	0	0	0	0.00333333	0.01	0	0	0	0	0	0	0	0	0	0	0	0.0133333	0.186667	0.136667	0	0	0			0.01	0.123333	0.01	0	0	0
	M8S34	0.00333333	0	0	0	0	0.00333333	0.02	0	0	0	0	0	0	0.00666667	0	0	0	0.00333333	0.00666667	0.28	0.0766667	0	0	0			0.00666667	0.0866667	0.03	0	0	0
	M8S35	0.0133333	0.01	0	0.03	0.196667	0.04	0.106667	0	0	0	0	0	0	0	0	0	0	0	0	0.193333	0.0166667	0	0	0			0.0266667	0.01	0	0.00666667	0	0
	M8S43	0.00666667	0	0	0.01	0.0933333	0.0333333	0.03	0	0	0	0	0	0	0	0	0.00666667	0	0	0	0.356667	0	0.00666667	0	0			0.0866667	0.00333333	0.00333333	0.02	0	0
	M8S54	0	0	0	0.0233333	0.0566667	0.0533333	0.0233333	0	0	0	0	0	0	0	0	0.00333333	0	0	0	0.486667	0	0	0	0			0.156667	0.00333333	0	0.00666667	0	0
	M8S55	0	0	0	0.02	0.253333	0.0166667	0.0233333	0	0	0	0	0	0	0	0	0.00333333	0	0	0	0.32	0	0	0	0			0.03	0	0	0	0	0
	M8S56	0	0	0	0.03	0.136667	0.0633333	0.05	0	0	0	0	0	0	0	0	0	0	0	0	0.46	0	0	0	0			0.0666667	0.02	0	0.0266667	0	0
	M8S57a	0	0	0	0.0233333	0.12	0.0266667	0.0333333	0	0	0	0	0	0	0	0	0	0	0	0	0.513333	0	0	0	0			0.0966667	0.01	0	0.02	0	0
	M8S57b	0	0	0	0.0333333	0.18	0.06	0.0433333	0	0	0	0	0	0	0	0	0	0	0	0	0.393333	0.0366667	0	0	0			0.123333	0.0133333	0	0.0133333	0	0
	CANAL_14-2	0.02	0	0	0.0366667	0.153333	0.01	0.0333333	0	0	0	0	0	0	0	0	0.00666667	0	0	0	0.303333	0	0.0366667	0	0			0.0666667	0.0333333	0	0.02	0	0
	CANAL_16-1	0.0266667	0	0	0.0433333	0.0566667	0.0366667	0.0566667	0	0	0	0	0	0	0.0133333	0	0.02	0	0	0.00333333	0.233333	0	0	0	0			0.193333	0.0133333	0	0	0	0
	CANAL_18-1	0.0233333	0	0	0.03	0.0533333	0.0233333	0.03	0	0	0	0	0	0	0	0	0.01	0	0	0	0.376667	0	0	0	0			0.176667	0.0533333	0	0	0	0
	CANAL_19-1	0	0	0	0	0.0133333	0.01	0.0666667	0	0	0	0	0	0	0	0	0.0166667	0	0	0	0.223333	0	0	0	0			0.09	0.02	0	0	0	0
	marmo 1	0.0133333	0	0	0	0	0.0233333	0.00666667	0	0	0	0.00333333	0	0	0	0	0.00333333	0.00666667	0	0.0133333	0.14	0.386667	0	0	0			0.0366667	0.00666667	0	0	0	0
	marmo 2	0	0	0	0	0	0	0	0	0	0	0	0	0	0	0	0.0133333	0	0	0.00666667	0.136667	0	0	0	0			0.03	0	0	0	0.22	0
	marmo 3	0.06	0.00666667	0	0	0	0.0166667	0.06	0	0	0	0	0	0	0	0	0	0.00333333	0	0.01	0.283333	0.0633333	0	0	0			0.0566667	0.0233333	0	0	0	0
	marmo.2	0.0666667	0	0	0	0	0.0166667	0.0266667	0	0	0	0	0	0	0.00333333	0	0	0	0	0.00333333	0.346667	0.0333333	0	0	0			0.04	0.0566667	0.01	0	0	0
	marmo.5	0	0	0	0.00333333	0.0433333	0.0133333	0.0166667	0	0.00333333	0	0	0	0	0	0	0	0.00333333	0	0	0.593333	0	0	0	0			0.0366667	0.00666667	0	0	0	0
	marmo.6	0	0	0	0	0.0266667	0.00666667	0.00333333	0	0	0	0	0	0	0.00333333	0	0	0	0	0	0.536667	0	0	0	0			0	0	0.00333333	0.00666667	0	0
[truncated: 49 more columns]

## Sheet: all-microfacies
								ANOVA: PARA DEMOSTRAR DIFERENCIA DE FACIES-COMPONENTES
facies según cluster Ultimo Bray-Curtis						para BOXPLOTS (izquierda) y ANOVA (izq, derecha sin0)					RELEVANT COMPONENTS				hay diferencias significativas en ANOVA				se puede hacer porque componente presente en todas las facies														comparando solo las facies-no solo facies de LBF- donde este presente el componente -requisito para ANOVA
SIN TENER EN CUENTA LAS MUESTRAS CON CORALES (CASITODO O 100%)						para medias, tabla		95%interval			para ver variacion abundancia componentes relevantes en las facies previamente diferenciadas																						con diferencias significativas en anova			rehacer estadisticas
ALL COMPONENTS				no significat							no diff	poca diff		no diff	poca diff	poca diff		poca diff	no diff	poca diff	poca diff	poca diff	poca diff	poca diff	no diff		poca diff
samples	FACIES	Nummulites	Heterostegina	Spiroclypeus	Operculina	Lepidocyclinids	Amphistegina	Neorotalia	Risananeiza	Austrotrillina	Borelis	Peneroplis	Acervulina	Victoriellids	Planorbulinids	Rotaliids	Miliolids	Textulariids	CA Geniculates	CCA	Corals	Echinoderms	Bryozoans	Bivalves	Brachiopods	Barnacles	Serpulids	Siliciclastics	Planktonic foraminifera	Orthophragminids			FACIES	NUMMULITES		FACIES	NEOROTALIA		FACIES	LEPIDOCYCLINIDS		FACIES	RISANANEIZA		FACIES	OPERCULINA		FACIES	HETEROSTEGINA
M1S7	MF1	0	0	0	0	0	0.813008	0	0	0	0	0	0	0	0	3.25203	0	0	0	52.0325	0	8.13008	0	0	0	0	0	0	35.7724	0
M6S2	MF1	0	0	0	0	0	0	0	0	0	0	0	0	0	0	0	0	0	0	0	0	12.963	0	0	0	0	0	0	87.037	0
M7S16	MF1	3.90625	0	0	0	0	0	0.78125	0	0	0	0	0	3.125	0	0.78125	0	0.78125	3.125	27.3437	0	3.90625	13.2813	0	0	0	0	0	42.9688	0
M8S15	MF1	2.99401	0	0	0	0	0.598802	2.39521	0	0	0	0	0.598802	0	0	0.598802	1.1976	0	1.1976	49.7006	2.39521	6.58683	3.59281	0	0	0	1.1976	0	26.9461	0
M8S29	MF1	3.65854	0	0	2.43902	0	7.31707	2.43902	0	0	0	0	0	3.65854	0	1.21951	0	0	1.21951	21.9512	0	8.53659	3.65854	0	0	0	0	0	43.9024	0
marmo2	MF1	0	0	0	0	0	0	0	0	0	0	0	0	0	0	3.27869	0	0	1.63934	33.6066	0	7.37705	0	0	0	0	0	0	54.0984	0
M1S1'	MF2	23.8462	0	0	0	0	3.07692	0	0	0	0	0	0	2.30769	0	0	3.07692	0.769231	0	50.7692	6.15385	3.07692	4.61538	1.53846	0	0.769231	0	0	0	0
M1S2	MF2	1.52672	0	0	0	0	0	0	0	0	0	0	0	0	0	0.763359	0	0	0	32.0611	64.8855	0	0.763359	0	0	0	0	0	0	0
M1S3	MF2	17.5824	0.549451	0	0	0	3.84615	3.2967	0	0	0	0	0	1.64835	0	0	0	0	1.0989	52.1978	2.74725	8.24176	5.49451	1.0989	0	0	0	0	2.1978	0
M1S4	MF2	5.8296	0	0	0	0	0.896861	0.44843	0	0	0	0	0	0	0.44843	0	0.44843	0	0	41.704	42.1525	4.93274	3.13901	0	0	0	0	0	0	0
M1S5 I	MF2	14.2012	0.591716	0	0	0	2.36686	1.18343	0	0	0	0	0	0.591716	0	0	0	0	0.591716	31.3609	44.9704	2.36686	1.18343	0.591716	0	0	0	0	0	0
M1S6	MF2	13.0952	0.595238	0	0.595238	0	0	2.97619	0	0	0	0	0	5.35714	0	0	0	0.595238	0.595238	54.1667	12.5	2.97619	4.7619	0.595238	0	0	0	0	1.19048	0
M1S11	MF2	18.8679	0.628931	0	0	0	3.14465	3.14465	0	0	0	0	0	0	0	0	1.25786	0	0	42.1384	16.9811	5.66038	6.91824	0.628931	0	0	0.628931	0	0	0
M6S1	MF2	15.534	0	0	0	0	4.85437	0	0	0	0	0	0	0	0	0	0	0	0	47.5728	9.70874	9.70874	12.6214	0	0	0	0	0	0	0
M6S6	MF2	4.86486	0	0	0	1.62162	1.62162	4.32432	0	0	0	0	0	5.94595	0	0	0	0	2.16216	40	20	8.64865	10.8108	0	0	0	0	0	0	0
M6S7	MF2	11.1732	0	0	0	0	0.558659	1.67598	0	0	0	0	0	0	0	0	0.558659	0	0	40.7821	36.3128	3.91061	5.02793	0	0	0	0	0	0	0
M6S8	MF2	2.7027	0	0	0	0	1.08108	0	0	0	0	0	0	3.24324	0	0	0.540541	0	0.540541	41.0811	39.4595	6.48649	4.86486	0	0	0	0	0	0	0
M6S9	MF2	19.2308	0	0	0	0	3.4188	8.54701	0	0	0	0	0	1.28205	0	0	0	0	0.42735	43.5897	2.99145	13.6752	6.83761	0	0	0	0	0	0	0
M6S12	MF2	10.625	0	0	0	0	1.25	3.75	0	0	0	0	0	4.375	0	0	0	0	0.625	46.875	3.75	16.875	11.25	0	0	0	0.625	0	0	0
M6S13	MF2	17.2185	0	0	0	0	0	0	0	0	0	0	0	0	0	0	0.662252	0	0.662252	54.3046	3.97351	6.62252	16.5563	0	0	0	0	0	0	0
M6S14	MF2	12.1795	0	0	0	0	0	1.28205	0	0	0	0	0	0	0	0	0	0	0	45.5128	10.2564	14.7436	8.33333	0	0	0	7.69231	0	0	0
M6S16	MF2	31.2057	0	0	0	2.12766	0.70922	2.83688	0	0	0	0.70922	0	0	0	0	1.41844	0	1.41844	47.5177	6.38298	4.25532	1.41844	0	0	0	0	0	0	0
M6S17	MF2	8	1.33333	0	0	0	3.33333	4.66667	0	0	0	0	0	1.33333	0	0	0	0	0	48.6667	20.6667	10	2	0	0	0	0	0	0	0
M6S18	MF2	23.5602	2.09424	0	0	0	2.09424	1.04712	0	0	0	0	0	0	0	1.04712	1.04712	0	0	50.2618	0.52356	7.8534	9.42408	0	0	0	1.04712	0	0	0
M6S23	MF2	15.1961	0	0	0	0	1.47059	2.45098	0	0	0.490196	0	0	0.490196	0	0	0	0	0.490196	39.7059	34.8039	4.90196	0	0	0	0	0	0	0	0
M6S27	MF2	9.48276	0	0	0	0	6.89655	5.17241	0	0	0	0	0	0	0	0	0	0	3.44828	63.7931	0	6.03448	4.31034	0	0	0	0.862069	0	0	0
M6S28	MF2	16.1074	2.01342	0	0	0	0	8.05369	0	0	0.671141	0	0	0	0	0	0	0	0	59.7315	0	8.05369	5.36913	0	0	0	0	0	0	0
M7S11	MF2	1.53061	0	0	0	0	1.53061	0	0	0	0	0	0	0	0	0	0	0	0	34.6939	54.0816	3.06122	4.59184	0	0	0	0	0	0.510204	0
M7S13	MF2	12.5	0	0	0	0	1.31579	3.28947	0	0	0	0	0	3.94737	0	0.657895	0	0.657895	0.657895	32.8947	38.8158	3.28947	1.97368	0	0	0	0	0	0	0
M7S15	MF2	12.2995	0	0	0	0	1.06952	2.6738	0	0	0	0	0	1.06952	0	0	0	0	1.06952	58.8235	0.534759	13.369	8.02139	0.534759	0	0	0.534759	0	0	0
M7S18	MF2	5.66038	0	0	0	0	1.25786	0	0	0	0	0	0	0.628931	0	0	0	0	0.628931	78.6164	1.88679	5.03145	5.66038	0	0	0	0.628931	0	0	0
M7S19	MF2	27.7778	0	0	0	0	1.51515	0	0	0	0	0	3.0303	1.51515	0	0	2.0202	0	1.0101	39.899	4.0404	6.56566	12.6263	0	0	0	0	0	0	0
M7S21	MF2	1.3986	0	0	0	0	2.0979	0	0	0	0	0	0	0	0	0	0	0	0	28.6713	65.035	0	1.3986	0	1.3986	0	0	0	0	0
M7S22	MF2	2.63158	0	0	0	0	3.50877	0	0	0	0	0	1.75439	0	0	0.877193	0.877193	0	1.75439	29.8246	52.6316	0.877193	5.26316	0	0	0	0	0	0	0
M7S23	MF2	2.20588	0	0	0	0	0.735294	0	0	0	0	0	0	0.735294	0	0	0	0	1.47059	51.4706	33.0882	7.35294	2.94118	0	0	0	0	0	0	0
M8S1	MF2	3.6036	0	0	0	0	1.8018	1.8018	0	0	0	0	0	0.45045	0	0.45045	0.45045	0	0	17.5676	63.964	3.6036	6.30631	0	0	0	0	0	0	0
M8S2	MF2	5.16432	0	0	0	0	0	0	0	0	0	0	0	0.938967	0	0	0	0	0.469484	50.7042	23.0047	13.615	6.10329	0	0	0	0	0	0	0
M8S3	MF2	9.62567	0	0	0	0	0	2.13904	0	0	0	0	0	2.13904	0	0.534759	0	0	1.06952	51.8717	3.74332	6.95187	21.9251	0	0	0	0	0	0	0
M8S4	MF2	6.52174	0	0	0	0	1.08696	3.80435	0	0	0	0	0	0	0	0.543478	0	0	0	52.7174	0.543478	17.9348	15.7609	0.543478	0	0	0	0	0.543478	0
M8S6	MF2	1.72414	0	0	0	0	0	1.72414	0	0	0	0	1.72414	0	0	0	0	0	0	50	37.931	3.44828	3.44828	0	0	0	0	0	0	0
M8S7	MF2	2.32558	0	0	0	0	2.32558	0	0	0	0	0	0	0	0	0	2.32558	0	2.32558	46.5116	39.5349	0	4.65116	0	0	0	0	0	0	0
M8S8	MF2	8.98876	0	0	1.1236	0	1.68539	5.61798	0	0	0	0	0	2.24719	0	0	0	0	0.561798	62.9213	3.37079	6.74157	5.05618	0	0	0	1.68539	0	0	0
M8S9	MF2	8.10811	0	0	0	0	0	1.08108	0	0	0	0	0	0.540541	0	0	0.540541	0	0	50.8108	36.2162	0	1.08108	0	0	0	1.62162	0	0	0
M8S10	MF2	2.09424	0	0	0	0	0	2.6178	0	0	0	0	0	0	0	0	1.04712	0	1.57068	40.8377	38.2199	1.04712	9.42408	2.6178	0	0	0.52356	0	0	0
M8S11	MF2	14.5161	0	0	0	0	0	4.30108	0	0	0	0	0.537634	1.6129	0	0	0.537634	0	1.07527	44.086	19.8925	5.37634	8.06452	0	0	0	0	0	0	0
M8S12	MF2	18.2353	0	0	0	0	2.35294	1.76471	0	0	0	0	0	1.76471	0	0	0.588235	0	1.76471	19.4118	29.4118	3.52941	10.5882	0	0	0	10.5882	0	0	0
M8S16	MF2	12.037	0	0	1.38889	0	4.16667	0.925926	0	0	0	0	0.925926	0.925926	0	0	0.462963	0	0.462963	43.9815	3.24074	7.87037	18.9815	2.77778	0	0	1.85185	0	0	0
M8S17	MF2	5.61798	0	0	0.561798	0	3.93258	2.24719	0	0	0	0	0	6.74157	0	0	0.561798	0	3.93258	42.6966	13.4831	2.80899	13.4831	0	1.68539	0	1.68539	0	0.561798	0
M8S18	MF2	12.7551	0	0	0	0	5.10204	0	0	0	0	0	0	0	0	0.510204	0	0	3.57143	58.1633	2.04082	5.61224	6.12245	0.510204	1.53061	0	1.53061	0	2.55102	0
M8S20	MF2	3.10078	0	0	0.775194	0	2.32558	3.10078	0	0	0	0	0	0.775194	0	0	0	0	0.775194	29.4574	44.9612	3.10078	9.30233	0.775194	0	0	0.775194	0	0.775194	0
M8S22	MF2	5.60748	0.934579	0	0.46729	0	1.40187	1.40187	0	0	0	0	0	0	0	0	0	0	0	30.3738	50.4673	0.934579	8.41121	0	0	0	0	0	0	0
M8S23	MF2	2.89855	2.17391	0	0	0	0	2.89855	0	0	0	0	0	0	0	0	0	0	0.724638	47.8261	18.1159	0	19.5652	0	0	0	5.7971	0	0	0
M8S30	MF2	17.2131	0.819672	0	0	0	2.45902	1.63934	0	0	0	0	0	5.7377	0	4.09836	0	0	0.819672	40.9836	0	2.45902	20.4918	0	0	0	3.27869	0	0	0
M8S31	MF2	6.15385	0	0	0	0	1.53846	1.53846	0	0	1.53846	0	0	0	0	0	3.07692	0	0	40	30.7692	7.69231	6.15385	0	0	0	0	0	1.53846	0
M8S32	MF2	7.42574	3.9604	0	0	0	2.47525	6.43564	0	0	0	0	0	0.990099	0	0.49505	0.49505	0	0	23.2673	33.6634	2.9703	13.8614	3.46535	0	0	0.49505	0	0	0
M8S33b	MF2	4.43038	1.89873	0	0	0	0.632911	1.89873	0	0	0	0	0	0	0	0	0	0	2.53165	35.443	25.9494	1.89873	23.4177	0	0	0	1.89873	0	0	0
marmo1	MF2	2.08333	0	0	0	0	3.64583	1.04167	0	0	0	0.520833	0	0	0	0.520833	1.04167	0	2.08333	21.875	60.4167	5.72917	1.04167	0	0	0	0	0	0	0
marmo3	MF2	10.2857	1.14286	0	0	0	2.85714	10.2857	0	0	0	0	0	0	0	0	0.571429	0	1.71429	48.5714	10.8571	9.71429	4	0	0	0	0	0	0	0
marmo.2	MF2	11.0497	0	0	0	0	2.76243	4.41989	0	0	0	0	0	0.552486	0	0	0	0	0.552486	57.4586	5.52486	6.62983	9.39227	0	0	0	1.65746	0	0	0
M1S10	MF3	2.77778	2.77778	0	0	0	3.47222	15.9722	0	0	0.694444	0	0	0	0	4.86111	0.694444	0	0	50.6944	8.33333	1.38889	6.25	0	0	0	0.694444	1.38889	0	0
M3S2	MF3	0	0	0	0	0	0.595238	5.95238	0	0	0.595238	0	0	0.595238	0	4.7619	10.7143	0.595238	0.595238	58.9286	0	11.9048	4.7619	0	0	0	0	0	0	0
M3S4	MF3	0	0	0	2.94118	0	0.588235	11.1765	0	0	0	0	0	9.41176	2.94118	5.88235	0	0.588235	0.588235	40	0	22.9412	2.94118	0	0	0	0	0	0	0
M3S5	MF3	0	0	0	0.740741	0	2.22222	43.7037	0	0	0	0	0	3.7037	1.48148	7.40741	3.7037	1.48148	0.740741	23.7037	0	9.62963	0.740741	0	0	0	0	0.740741	0	0
M3S12	MF3	0	0	0	0	0	0	1.53846	0	0	0	0	0	0	0	0	0.769231	1.53846	0	67.6923	24.6154	0.769231	1.53846	0	0	0	1.53846	0	0	0
M3S15	MF3	0	0	0	0	0	2.12766	14.8936	0	1.06383	1.06383	1.06383	0	2.12766	0	0	3.19149	0	0	52.1277	22.3404	0	0	0	0	0	0	0	0	0
M4S7	MF3	0	0	0	0	0.497512	0.995025	28.8557	0	0	0	0	0	0	0	0.995025	2.48756	0.995025	1.49254	44.7761	0	17.9104	0.995025	0	0	0	0	0	0	0
M4S8	MF3	0	0	0	0	0	0.581395	20.9302	0	0	0	0	0	0	0.581395	2.32558	0.581395	0	0.581395	48.2558	0	19.7674	6.39535	0	0	0	0	0	0	0
M4S9	MF3	0	2.01005	0	0	3.01508	2.01005	26.1307	0	0.502513	0	0	0	1.00503	0	2.51256	0	0	1.00503	28.6432	0	29.1457	4.0201	0	0	0	0	0	0	0
M5S5	MF3	0	0.769231	0	0	0	0.769231	31.5385	5.38462	0	0	0	0	0	0	0	1.53846	0	0	43.8462	0	10.7692	1.53846	0	0	0	0	3.84615	0	0
M5S6	MF3	0	0.546448	0	0	0	1.63934	52.459	6.55738	0	0	0	0	0	0.546448	0	0.546448	0.546448	1.0929	26.2295	0	6.55738	0.546448	0.546448	0	0	1.63934	0.546448	0	0
M6S3	MF3	0.460829	0	0	0	0	0.921659	4.60829	0	0	0	0.921659	0	0.921659	0	0	0	0	4.60829	57.6037	0	17.0507	12.4424	0	0	0	0	0	0.460829	0
M6S5	MF3	0	0	0	0	0	0	10.1563	0	0	0	0	0	0	0.390625	0	1.17188	0	0	18.75	57.0312	8.98438	3.51563	0	0	0	0	0	0	0
M6S24	MF3	1.83486	0	0	0	0	0.917431	5.50459	0	0	0	0.917431	0	3.66972	0	1.83486	0	0	0	54.1284	0	24.7706	6.42202	0	0	0	0	0	0	0
M7S12	MF3	0	0	0	0	0	0	21.8579	0	0	0	0	0	0	0	1.63934	2.73224	1.0929	5.46448	48.6339	0	11.4754	4.91803	0	0	0	0	0	2.18579	0
M8S5	MF3	0	0	0	0	0	1.38889	1.38889	0	0	0	0	0	0	0	0	0	0	1.38889	30.5556	61.1111	0	1.38889	0	0	0	2.77778	0	0	0
M8S24	MF3	1.06383	0	0	0	4.78723	2.12766	22.8723	0	0	0	0	0	0	0	0	0.531915	0	1.06383	38.8298	17.5532	5.31915	5.85106	0	0	0	0	0	0	0
M8S25	MF3	0	0	0	0	1.44231	12.5	36.5385	0	0	0	0	0	0	0	0	0	0	0	37.9808	0	10.0962	0	0	0	0	0	1.44231	0	0
M8S26	MF3	0	0	0	0	1.76471	2.94118	23.5294	0	0	0	0	0	0	0	3.52941	1.76471	1.17647	0.588235	45.8824	0	15.8824	0.588235	0	0	0	0	2.35294	0	0
M8S34	MF3	0.636943	0	0	0	0	0.636943	3.82166	0	0	0	0	0	1.27389	0	0	0	0.636943	1.27389	53.5032	14.6497	1.27389	16.5605	0	0	0	5.73248	0	0	0
CANAL19-1	MF3	0	0	0	0	3.0303	2.27273	15.1515	0	0	0	0	0	0	0	3.78788	0	0	0	50.7576	0	20.4545	4.54545	0	0	0	0	0	0	0
M1S14	MF4	0	0	0	15.5963	32.1101	0.917431	0	0	0	0	0	0	0	0	0	0	2.75229	0	27.5229	0	0.917431	8.25688	0.917431	0	0	0	5.50459	5.50459	0
M1S15b	MF4	4.7619	0.952381	0	3.80952	4.7619	0	0	0	0	0	0	0	0	0	8.57143	0	0	0	51.4286	8.57143	6.66667	2.85714	0.952381	0	0	0	5.71429	0.952381	0
M1S16a	MF4	1.51515	0	0	7.57576	14.3939	5.30303	6.81818	0	0	0	0	0	0.757576	0	0	0	0	0	43.1818	0	4.54545	3.78788	0	0	0	0	10.6061	1.51515	0
M1S16b	MF4	0.653595	0	0	3.26797	11.1111	3.26797	15.6863	0	0	0	0	0	0.653595	0	11.1111	0	0	0	38.5621	0	2.61438	3.92157	0	0	0	0.653595	8.49673	0	0
M2S1	MF4	0	0	0	2.8169	9.15493	9.15493	11.2676	0	0	0	0	0	0	0	6.33803	0	0	0	54.2254	0	2.11268	0	0	0	0	0	4.92958	0	0
M2S2I	MF4	0	0	0	4.95868	8.26446	4.13223	19.0083	0	0	0	0	0	0	0	5.78512	0	0	0	48.7603	0	1.65289	0.826446	0	0	0	0	6.61157	0	0
M2S3	MF4	0	0	0	21.4815	11.1111	8.88889	3.7037	0	0	0	0	0	0	0	0	0	0	0	45.1852	0	4.44444	1.48148	0.740741	0	0	0	2.96296	0	0
M2S10	MF4	0.645161	0	0	18.7097	9.67742	7.74194	7.09677	0	0	0	0	0	0	0	3.22581	0	0	0	41.2903	0	4.51613	5.16129	0	0	0	0	1.93548	0	0
M2S12B	MF4	0	0	0	2.31214	10.4046	5.78035	6.93642	0	0	0	0	0	0	0.578035	3.46821	0	0	0	60.6936	1.15607	5.20231	1.15607	0	0	0	0	2.31214	0	0
M2S12C	MF4	0	0	0	0.666667	10.6667	0	4.66667	0	0	0	0	0	0	0	0.666667	0	0	0	70	0	3.33333	10	0	0	0	0	0	0	0
M2S13	MF4	0	0	0	3.9801	22.3881	2.48756	7.46269	0	0	0	0	0	1.49254	0	0	0	0	0	56.7164	0	1.49254	2.98507	0	0	0	0	0.995025	0	0
M3S3	MF4	0	0	0	1.97368	4.60526	7.23684	11.8421	0	0	0.657895	1.31579	0	3.94737	1.97368	3.28947	5.92105	0.657895	0.657895	39.4737	0	11.8421	1.31579	0	0	0	0	3.28947	0	0
M3S6	MF4	0	0	0	4.51128	1.50376	2.25564	12.782	0	0.75188	0	0	0	7.5188	0	4.51128	3.00752	3.7594	5.26316	36.8421	0	12.0301	0	0	0	0	0	5.26316	0	0
M3S13	MF4	0	1.35135	0	4.72973	4.05405	4.05405	10.8108	3.37838	0	0	0	0	0	0	2.02703	0.675676	0	0.675676	39.1892	13.5135	11.4865	3.37838	0	0	0	0.675676	0	0	0
M6S10	MF4	0	0	0	2.71318	10.8527	1.93798	1.55039	0	0	0	0.387597	0	0	0	1.16279	0	0.387597	0	58.9147	0	18.9922	1.16279	0	0	0	0	1.93798	0	0
M6S30	MF4	0	0	0	0	2.63158	5.26316	3.50877	0	0	0	0	0	0	0	0	0	0	0	81.1404	0	1.31579	0.877193	0.438596	0	0	0	4.82456	0	0
M8S35	MF4	2.05128	1.53846	0	4.61538	30.2564	6.15385	16.4103	0	0	0	0	0	0	0	0	0	0	0	29.7436	2.5641	4.10256	1.53846	0	0	0	0	1.02564	0	0
M8S43	MF4	1.01523	0	0	1.52284	14.2132	5.07614	4.56853	0	0	0	0	0	0	0	1.01523	0	0	0	54.3147	0	13.198	0.507614	1.01523	0	0	0.507614	3.04569	0	0
M8S54	MF4	0	0	0	2.86885	6.96721	6.55738	2.86885	0	0	0	0	0	0	0	0.409836	0	0	0	59.8361	0	19.2623	0.409836	0	0	0	0	0.819672	0	0
M8S55	MF4	0	0	0	3	38	2.5	3.5	0	0	0	0	0	0	0	0.5	0	0	0	48	0	4.5	0	0	0	0	0	0	0	0
M8S56	MF4	0	0	0	3.51563	16.0156	7.42188	5.85938	0	0	0	0	0	0	0	0	0	0	0	53.9063	0	7.8125	2.34375	0	0	0	0	3.125	0	0
M8S57a	MF4	0	0	0	2.7668	14.2292	3.16206	3.95257	0	0	0	0	0	0	0	0	0	0	0	60.8696	0	11.4625	1.18577	0	0	0	0	2.37154	0	0
M8S57b	MF4	0	0	0	3.71747	20.0743	6.69145	4.83271	0	0	0	0	0	0	0	0	0	0	0	43.8662	4.08922	13.7546	1.48699	0	0	0	0	1.48699	0	0
CANAL14-2	MF4	2.77778	0	0	5.09259	21.2963	1.38889	4.62963	0	0	0	0	0	0	0	0.925926	0	0	0	42.1296	0	9.25926	4.62963	5.09259	0	0	0	2.77778	0	0
CANAL16-1	MF4	3.82775	0	0	6.2201	8.13397	5.26316	8.13397	0	0	0	0	0	1.91388	0	2.87081	0	0	0.478469	33.4928	0	27.7512	1.91388	0	0	0	0	0	0	0
CANAL18-1	MF4	3.00429	0	0	3.86266	6.86695	3.00429	3.86266	0	0	0	0	0	0	0	1.28755	0	0	0	48.4979	0	22.7468	6.86695	0	0	0	0	0	0	0
marmo.5	MF4	0	0	0	0.462963	6.01852	1.85185	2.31481	0	0.462963	0	0	0	0	0	0	0.462963	0	0	82.4074	0	5.09259	0.925926	0	0	0	0	0	0	0
marmo.6	MF4	0	0	0	0	4.54545	1.13636	0.568182	0	0	0	0	0	0.568182	0	0	0	0	0	91.4773	0	0	0	0	0	0	0.568182	1.13636	0	0
M3S16	MF5	0	1.05263	0	0	2.10526	2.10526	6.31579	7.36842	0	0	1.05263	0	3.15789	1.05263	4.21053	7.36842	0	2.10526	36.8421	20	2.10526	2.10526	0	1.05263	0	0	0	0	0
M3S18	MF5	0	1.81818	0	0.909091	4.54545	0.909091	3.63636	3.63636	0.909091	0	0	0	0	0.909091	3.63636	6.36364	0.909091	1.81818	43.6364	12.7273	3.63636	7.27273	0	0	0	1.81818	0.909091	0	0
M4S3	MF5	0	0	0	1.8018	2.7027	2.7027	6.30631	22.5225	0.900901	0	0	0	0	1.8018	4.5045	6.30631	0	4.5045	24.3243	0.900901	9.00901	2.7027	0.900901	0	6.30631	0	0	1.8018	0
M4S17	MF5	0	3.09278	0	0	0	0	0	6.18557	1.03093	0	1.03093	0	0	1.03093	0	6.18557	1.03093	2.06186	60.8247	0	14.433	1.03093	1.03093	0	0	0	1.03093	0	0
M5S2	MF5	0	0	0	0	2.11268	0	0	7.04225	0	0	0	0	0	0	1.40845	2.11268	0	0	76.0563	4.92958	0	1.40845	0.704225	2.11268	0	0	2.11268	0	0
M5S3	MF5	0	0	0	0.826446	0.826446	1.65289	1.65289	2.47934	0	0	0	0	0	0	0	0	0	0	25.6198	0	35.5372	23.1405	2.47934	0	0	0	5.78512	0	0
M5S4a	MF5	0	0.719424	0	0	10.0719	2.8777	4.31655	9.35252	0	0	0	0	0	0	0	0.719424	0	0	44.6043	0	5.7554	16.5468	0.719424	0	0	0.719424	3.59712	0	0
M5S4b	MF5	0	0.980392	0	0	9.80392	0.980392	0	9.80392	0	0	0	0	0	0	0	3.92157	0	0	49.0196	0	5.88235	10.7843	1.96078	0	0	0	5.88235	0.980392	0
M5S7	MF5	0	5.10949	0	0	0	0	0	7.29927	0	0	0	0	0	0	0	1.45985	0	0	37.9562	27.7372	13.1387	5.83942	0	0	0	0	1.45985	0	0
M5S8	MF5	0	4.58716	3.66972	0	0	0.917431	1.83486	5.50459	1.83486	0	0	0	0	0	0	2.75229	0	0	51.3761	10.0917	12.844	0	1.83486	0	0	0	2.75229	0	0
M5S10	MF5	0	0	0	0	0	0.689655	2.75862	2.75862	1.37931	0	0	0	0	0	0	0.689655	0	0	57.2414	12.4138	10.3448	0	0.689655	0	0	11.0345	0	0	0
M5S11	MF5	0	3.67647	0	0	0	0	5.14706	8.08824	0	1.47059	0.735294	0	0	0	0	0	0	0.735294	52.2059	19.8529	7.35294	0	0.735294	0	0	0	0	0	0
M5S12	MF5	0	0	0	0	0	0	7.69231	11.5385	0	0	0	0	0	1.28205	0	1.28205	0	5.12821	39.7436	0	10.2564	1.28205	1.28205	0	0	0	20.5128	0	0
M5S14	MF6	0	0	0	0	0	1.00503	0	0	0	0	0	0.502513	0	0	3.01508	0.502513	0.502513	1.00503	36.1809	0	4.52261	0.502513	2.01005	0	9.54774	0.502513	38.191	2.01005	0
M5S14bis	MF6	0	0	0	0	0	0.847458	0	0	0	0	0	7.62712	0	0	0.847458	0	1.27119	0.423729	82.2034	0	1.27119	0.423729	0	0	0	1.69492	3.38983	0	0
M5S15	MF6	0	0	0	0	0	2.57732	0	0	0	0	0	2.06186	0	0	2.57732	0	0	0.515464	53.6082	0	4.63918	2.57732	4.63918	0	1.03093	1.54639	22.6804	1.54639	0
		Nummulites	Heterostegina	Spiroclypeus	Operculina	Lepidocyclinids	Amphistegina	Neorotalia	Risananeiza	Austrotrillina	Borelis	Peneroplis	Acervulina	Victoriellids	Planorbulinids	Rotaliids	Miliolids	Textulariids	CA Geniculates	CCA	Corals	Echinoderms	Bryozoans	Bivalves	Brachiopods	Barnacles	Serpulids	Siliciclastics	Planktonic foraminifera	Orthophragminids
M7S1	Orthophragminids	0	0	0	0	0	0	0	0	0	0	0	0	0	0	0	0.729927	0	0	56.2044	2.18978	2.18978	0	0	0	0	0	0	0	38.6861
M7S3	Orthophragminids	0.851064	0	0	0	0	0	0	0	0	0	0	0	0	0	0	0	0	0.851064	52.3404	22.9787	5.53191	15.7447	0	0	0	0	0	0	1.70213
M7S5	Orthophragminids	0.675676	0	0	0	0	0	2.02703	0	0	0	0	0	0	0	0	0	0	0	66.2162	4.05405	12.1622	9.45946	4.05405	0	0	0	0	0	1.35135
M7S6	Orthophragminids	0.555556	0	0	0	0	1.66667	2.77778	0	0	0	0	0	0	0	0	0	0	0	51.1111	11.1111	18.8889	12.2222	0	0	0	0	0	0	1.66667
M7S7	Orthophragminids	2.52101	0	0	0	0	0	0	0	0	0	0	0	0	0	0	0	0.840336	1.68067	47.0588	36.9748	5.04202	5.04202	0	0	0	0	0	0	0.840336
M7S9	Orthophragminids	3.84615	0	0	0	0	1.64835	0.549451	0	0	0	0	0	0	0	0	0	0	0.549451	52.7473	23.0769	4.94505	8.24176	0	0	0	0	0	0	4.3956
M7S10	Orthophragminids	3.06748	0	0	0	0	1.84049	0	0	0	0	0	0	0.613497	0	0	0.613497	0	0	58.2822	20.2454	4.29448	8.58896	0	0	0	0	0	0.613497	1.84049

## Sheet: Pareto-diagrams
con facies Cluster Ultimo Bray-Curtis							PARA HACER HISTOGRAMAS PARETO
samples	MF	Nummulites	Heterostegina	Spiroclypeus	Operculina	Lepidocyclinids	Amphistegina	Neorotalia	Risananeiza	Austrotrillina	Borelis	Peneroplis	Acervulina	Victoriellids	Planorbulinids	Rotaliids	Miliolids	Textulariids	Geniculate CA	CCA	Corals	Echinoderms	Bryozoans	Bivalves	Brachiopods	Barnacles	Serpulids	Quartz	Planktonics
M1S7	MF1	0	0	0	0	0	0.813008	0	0	0	0	0	0	0	0	3.25203	0	0	0	52.0325	0	8.13008	0	0	0	0	0	0	35.7724
M6S2	MF1	0	0	0	0	0	0	0	0	0	0	0	0	0	0	0	0	0	0	0	0	12.963	0	0	0	0	0	0	87.037
M7S16	MF1	3.90625	0	0	0	0	0	0.78125	0	0	0	0	0	3.125	0	0.78125	0	0.78125	3.125	27.3437	0	3.90625	13.2813	0	0	0	0	0	42.9688
M8S15	MF1	2.99401	0	0	0	0	0.598802	2.39521	0	0	0	0	0.598802	0	0	0.598802	1.1976	0	1.1976	49.7006	2.39521	6.58683	3.59281	0	0	0	1.1976	0	26.9461
M8S29	MF1	3.65854	0	0	2.43902	0	7.31707	2.43902	0	0	0	0	0	3.65854	0	1.21951	0	0	1.21951	21.9512	0	8.53659	3.65854	0	0	0	0	0	43.9024
marmo2	MF1	0	0	0	0	0	0	0	0	0	0	0	0	0	0	3.27869	0	0	1.63934	33.6066	0	7.37705	0	0	0	0	0	0	54.0984
	Min	0	0	0	0	0	0	0	0	0	0	0	0	0	0	0	0	0	0	0	0	3.90625	0	0	0	0	0	0	26.9461
	Max	3.90625	0	0	2.43902	0	7.31707	2.43902	0	0	0	0	0.598802	3.65854	0	3.27869	1.1976	0.78125	3.125	52.0325	2.39521	12.963	13.2813	0	0	0	1.1976	0	87.037
	Mean	1.7598	0	0	0.406504	0	1.45481	0.935914	0	0	0	0	0.0998004	1.13059	0	1.52171	0.199601	0.130208	1.19691	30.7724	0.399202	7.91663	3.4221	0	0	0	0.199601	0	48.4542
samples	MF	Nummulites	Heterostegina	Spiroclypeus	Operculina	Lepidocyclinids	Amphistegina	Neorotalia	Risananeiza	Austrotrillina	Borelis	Peneroplis	Acervulina	Victoriellids	Planorbulinids	Rotaliids	Miliolids	Textulariids	Geniculate CA	CCA	Corals	Echinoderms	Bryozoans	Bivalves	Brachiopods	Barnacles	Serpulids	Quartz	Planktonics
M1S1'	MF2	23.8462	0	0	0	0	3.07692	0	0	0	0	0	0	2.30769	0	0	3.07692	0.769231	0	50.7692	6.15385	3.07692	4.61538	1.53846	0	0.769231	0	0	0
M1S2	MF2	1.52672	0	0	0	0	0	0	0	0	0	0	0	0	0	0.763359	0	0	0	32.0611	64.8855	0	0.763359	0	0	0	0	0	0
M1S3	MF2	17.5824	0.549451	0	0	0	3.84615	3.2967	0	0	0	0	0	1.64835	0	0	0	0	1.0989	52.1978	2.74725	8.24176	5.49451	1.0989	0	0	0	0	2.1978
M1S4	MF2	5.8296	0	0	0	0	0.896861	0.44843	0	0	0	0	0	0	0.44843	0	0.44843	0	0	41.704	42.1525	4.93274	3.13901	0	0	0	0	0	0
M1S5 I	MF2	14.2012	0.591716	0	0	0	2.36686	1.18343	0	0	0	0	0	0.591716	0	0	0	0	0.591716	31.3609	44.9704	2.36686	1.18343	0.591716	0	0	0	0	0
M1S6	MF2	13.0952	0.595238	0	0.595238	0	0	2.97619	0	0	0	0	0	5.35714	0	0	0	0.595238	0.595238	54.1667	12.5	2.97619	4.7619	0.595238	0	0	0	0	1.19048
M1S11	MF2	18.8679	0.628931	0	0	0	3.14465	3.14465	0	0	0	0	0	0	0	0	1.25786	0	0	42.1384	16.9811	5.66038	6.91824	0.628931	0	0	0.628931	0	0
M6S1	MF2	15.534	0	0	0	0	4.85437	0	0	0	0	0	0	0	0	0	0	0	0	47.5728	9.70874	9.70874	12.6214	0	0	0	0	0	0
M6S6	MF2	4.86486	0	0	0	1.62162	1.62162	4.32432	0	0	0	0	0	5.94595	0	0	0	0	2.16216	40	20	8.64865	10.8108	0	0	0	0	0	0
M6S7	MF2	11.1732	0	0	0	0	0.558659	1.67598	0	0	0	0	0	0	0	0	0.558659	0	0	40.7821	36.3128	3.91061	5.02793	0	0	0	0	0	0
M6S8	MF2	2.7027	0	0	0	0	1.08108	0	0	0	0	0	0	3.24324	0	0	0.540541	0	0.540541	41.0811	39.4595	6.48649	4.86486	0	0	0	0	0	0
M6S9	MF2	19.2308	0	0	0	0	3.4188	8.54701	0	0	0	0	0	1.28205	0	0	0	0	0.42735	43.5897	2.99145	13.6752	6.83761	0	0	0	0	0	0
M6S12	MF2	10.625	0	0	0	0	1.25	3.75	0	0	0	0	0	4.375	0	0	0	0	0.625	46.875	3.75	16.875	11.25	0	0	0	0.625	0	0
M6S13	MF2	17.2185	0	0	0	0	0	0	0	0	0	0	0	0	0	0	0.662252	0	0.662252	54.3046	3.97351	6.62252	16.5563	0	0	0	0	0	0
M6S14	MF2	12.1795	0	0	0	0	0	1.28205	0	0	0	0	0	0	0	0	0	0	0	45.5128	10.2564	14.7436	8.33333	0	0	0	7.69231	0	0
M6S16	MF2	31.2057	0	0	0	2.12766	0.70922	2.83688	0	0	0	0.70922	0	0	0	0	1.41844	0	1.41844	47.5177	6.38298	4.25532	1.41844	0	0	0	0	0	0
M6S17	MF2	8	1.33333	0	0	0	3.33333	4.66667	0	0	0	0	0	1.33333	0	0	0	0	0	48.6667	20.6667	10	2	0	0	0	0	0	0
M6S18	MF2	23.5602	2.09424	0	0	0	2.09424	1.04712	0	0	0	0	0	0	0	1.04712	1.04712	0	0	50.2618	0.52356	7.8534	9.42408	0	0	0	1.04712	0	0
M6S23	MF2	15.1961	0	0	0	0	1.47059	2.45098	0	0	0.490196	0	0	0.490196	0	0	0	0	0.490196	39.7059	34.8039	4.90196	0	0	0	0	0	0	0
M6S27	MF2	9.48276	0	0	0	0	6.89655	5.17241	0	0	0	0	0	0	0	0	0	0	3.44828	63.7931	0	6.03448	4.31034	0	0	0	0.862069	0	0
M6S28	MF2	16.1074	2.01342	0	0	0	0	8.05369	0	0	0.671141	0	0	0	0	0	0	0	0	59.7315	0	8.05369	5.36913	0	0	0	0	0	0
M7S11	MF2	1.53061	0	0	0	0	1.53061	0	0	0	0	0	0	0	0	0	0	0	0	34.6939	54.0816	3.06122	4.59184	0	0	0	0	0	0.510204
M7S13	MF2	12.5	0	0	0	0	1.31579	3.28947	0	0	0	0	0	3.94737	0	0.657895	0	0.657895	0.657895	32.8947	38.8158	3.28947	1.97368	0	0	0	0	0	0
M7S15	MF2	12.2995	0	0	0	0	1.06952	2.6738	0	0	0	0	0	1.06952	0	0	0	0	1.06952	58.8235	0.534759	13.369	8.02139	0.534759	0	0	0.534759	0	0
M7S18	MF2	5.66038	0	0	0	0	1.25786	0	0	0	0	0	0	0.628931	0	0	0	0	0.628931	78.6164	1.88679	5.03145	5.66038	0	0	0	0.628931	0	0
M7S19	MF2	27.7778	0	0	0	0	1.51515	0	0	0	0	0	3.0303	1.51515	0	0	2.0202	0	1.0101	39.899	4.0404	6.56566	12.6263	0	0	0	0	0	0
M7S21	MF2	1.3986	0	0	0	0	2.0979	0	0	0	0	0	0	0	0	0	0	0	0	28.6713	65.035	0	1.3986	0	1.3986	0	0	0	0
M7S22	MF2	2.63158	0	0	0	0	3.50877	0	0	0	0	0	1.75439	0	0	0.877193	0.877193	0	1.75439	29.8246	52.6316	0.877193	5.26316	0	0	0	0	0	0
M7S23	MF2	2.20588	0	0	0	0	0.735294	0	0	0	0	0	0	0.735294	0	0	0	0	1.47059	51.4706	33.0882	7.35294	2.94118	0	0	0	0	0	0
M8S1	MF2	3.6036	0	0	0	0	1.8018	1.8018	0	0	0	0	0	0.45045	0	0.45045	0.45045	0	0	17.5676	63.964	3.6036	6.30631	0	0	0	0	0	0
M8S2	MF2	5.16432	0	0	0	0	0	0	0	0	0	0	0	0.938967	0	0	0	0	0.469484	50.7042	23.0047	13.615	6.10329	0	0	0	0	0	0
M8S3	MF2	9.62567	0	0	0	0	0	2.13904	0	0	0	0	0	2.13904	0	0.534759	0	0	1.06952	51.8717	3.74332	6.95187	21.9251	0	0	0	0	0	0
M8S4	MF2	6.52174	0	0	0	0	1.08696	3.80435	0	0	0	0	0	0	0	0.543478	0	0	0	52.7174	0.543478	17.9348	15.7609	0.543478	0	0	0	0	0.543478
M8S6	MF2	1.72414	0	0	0	0	0	1.72414	0	0	0	0	1.72414	0	0	0	0	0	0	50	37.931	3.44828	3.44828	0	0	0	0	0	0
M8S7	MF2	2.32558	0	0	0	0	2.32558	0	0	0	0	0	0	0	0	0	2.32558	0	2.32558	46.5116	39.5349	0	4.65116	0	0	0	0	0	0
M8S8	MF2	8.98876	0	0	1.1236	0	1.68539	5.61798	0	0	0	0	0	2.24719	0	0	0	0	0.561798	62.9213	3.37079	6.74157	5.05618	0	0	0	1.68539	0	0
M8S9	MF2	8.10811	0	0	0	0	0	1.08108	0	0	0	0	0	0.540541	0	0	0.540541	0	0	50.8108	36.2162	0	1.08108	0	0	0	1.62162	0	0
M8S10	MF2	2.09424	0	0	0	0	0	2.6178	0	0	0	0	0	0	0	0	1.04712	0	1.57068	40.8377	38.2199	1.04712	9.42408	2.6178	0	0	0.52356	0	0
M8S11	MF2	14.5161	0	0	0	0	0	4.30108	0	0	0	0	0.537634	1.6129	0	0	0.537634	0	1.07527	44.086	19.8925	5.37634	8.06452	0	0	0	0	0	0
M8S12	MF2	18.2353	0	0	0	0	2.35294	1.76471	0	0	0	0	0	1.76471	0	0	0.588235	0	1.76471	19.4118	29.4118	3.52941	10.5882	0	0	0	10.5882	0	0
M8S16	MF2	12.037	0	0	1.38889	0	4.16667	0.925926	0	0	0	0	0.925926	0.925926	0	0	0.462963	0	0.462963	43.9815	3.24074	7.87037	18.9815	2.77778	0	0	1.85185	0	0
M8S17	MF2	5.61798	0	0	0.561798	0	3.93258	2.24719	0	0	0	0	0	6.74157	0	0	0.561798	0	3.93258	42.6966	13.4831	2.80899	13.4831	0	1.68539	0	1.68539	0	0.561798
M8S18	MF2	12.7551	0	0	0	0	5.10204	0	0	0	0	0	0	0	0	0.510204	0	0	3.57143	58.1633	2.04082	5.61224	6.12245	0.510204	1.53061	0	1.53061	0	2.55102
M8S20	MF2	3.10078	0	0	0.775194	0	2.32558	3.10078	0	0	0	0	0	0.775194	0	0	0	0	0.775194	29.4574	44.9612	3.10078	9.30233	0.775194	0	0	0.775194	0	0.775194
M8S22	MF2	5.60748	0.934579	0	0.46729	0	1.40187	1.40187	0	0	0	0	0	0	0	0	0	0	0	30.3738	50.4673	0.934579	8.41121	0	0	0	0	0	0
M8S23	MF2	2.89855	2.17391	0	0	0	0	2.89855	0	0	0	0	0	0	0	0	0	0	0.724638	47.8261	18.1159	0	19.5652	0	0	0	5.7971	0	0
M8S30	MF2	17.2131	0.819672	0	0	0	2.45902	1.63934	0	0	0	0	0	5.7377	0	4.09836	0	0	0.819672	40.9836	0	2.45902	20.4918	0	0	0	3.27869	0	0
M8S31	MF2	6.15385	0	0	0	0	1.53846	1.53846	0	0	1.53846	0	0	0	0	0	3.07692	0	0	40	30.7692	7.69231	6.15385	0	0	0	0	0	1.53846
M8S32	MF2	7.42574	3.9604	0	0	0	2.47525	6.43564	0	0	0	0	0	0.990099	0	0.49505	0.49505	0	0	23.2673	33.6634	2.9703	13.8614	3.46535	0	0	0.49505	0	0
M8S33b	MF2	4.43038	1.89873	0	0	0	0.632911	1.89873	0	0	0	0	0	0	0	0	0	0	2.53165	35.443	25.9494	1.89873	23.4177	0	0	0	1.89873	0	0
marmo1	MF2	2.08333	0	0	0	0	3.64583	1.04167	0	0	0	0.520833	0	0	0	0.520833	1.04167	0	2.08333	21.875	60.4167	5.72917	1.04167	0	0	0	0	0	0
marmo3	MF2	10.2857	1.14286	0	0	0	2.85714	10.2857	0	0	0	0	0	0	0	0	0.571429	0	1.71429	48.5714	10.8571	9.71429	4	0	0	0	0	0	0
marmo.2	MF2	11.0497	0	0	0	0	2.76243	4.41989	0	0	0	0	0	0.552486	0	0	0	0	0.552486	57.4586	5.52486	6.62983	9.39227	0	0	0	1.65746	0	0
	Min	1.3986	0	0	0	0	0	0	0	0	0	0	0	0	0	0	0	0	0	17.5676	0	0	0	0	0	0	0	0	0
	Max	31.2057	3.9604	0	1.38889	2.12766	6.89655	10.2857	0	0	1.53846	0.70922	3.0303	6.74157	0.44843	4.09836	3.07692	0.769231	3.93258	78.6164	65.035	17.9348	23.4177	3.46535	1.68539	0.769231	10.5882	0	2.55102
	Mean	10.1811	0.353519	0	0.0926793	0.0707412	1.81516	2.33029	0	0	0.0509396	0.0232086	0.150422	1.12996	0.00846095	0.198089	0.445415	0.0381578	0.84258	44.0797	23.1067	5.81585	7.82661	0.295808	0.0870681	0.0145138	0.856755	0	0.186197
samples	MF	Nummulites	Heterostegina	Spiroclypeus	Operculina	Lepidocyclinids	Amphistegina	Neorotalia	Risananeiza	Austrotrillina	Borelis	Peneroplis	Acervulina	Victoriellids	Planorbulinids	Rotaliids	Miliolids	Textulariids	Geniculate CA	CCA	Corals	Echinoderms	Bryozoans	Bivalves	Brachiopods	Barnacles	Serpulids	Quartz	Planktonics
M1S10	MF3	2.77778	2.77778	0	0	0	3.47222	15.9722	0	0	0.694444	0	0	0	0	4.86111	0.694444	0	0	50.6944	8.33333	1.38889	6.25	0	0	0	0.694444	1.38889	0
M3S2	MF3	0	0	0	0	0	0.595238	5.95238	0	0	0.595238	0	0	0.595238	0	4.7619	10.7143	0.595238	0.595238	58.9286	0	11.9048	4.7619	0	0	0	0	0	0
M3S4	MF3	0	0	0	2.94118	0	0.588235	11.1765	0	0	0	0	0	9.41176	2.94118	5.88235	0	0.588235	0.588235	40	0	22.9412	2.94118	0	0	0	0	0	0
M3S5	MF3	0	0	0	0.740741	0	2.22222	43.7037	0	0	0	0	0	3.7037	1.48148	7.40741	3.7037	1.48148	0.740741	23.7037	0	9.62963	0.740741	0	0	0	0	0.740741	0
M3S12	MF3	0	0	0	0	0	0	1.53846	0	0	0	0	0	0	0	0	0.769231	1.53846	0	67.6923	24.6154	0.769231	1.53846	0	0	0	1.53846	0	0
M3S15	MF3	0	0	0	0	0	2.12766	14.8936	0	1.06383	1.06383	1.06383	0	2.12766	0	0	3.19149	0	0	52.1277	22.3404	0	0	0	0	0	0	0	0
M4S7	MF3	0	0	0	0	0.497512	0.995025	28.8557	0	0	0	0	0	0	0	0.995025	2.48756	0.995025	1.49254	44.7761	0	17.9104	0.995025	0	0	0	0	0	0
M4S8	MF3	0	0	0	0	0	0.581395	20.9302	0	0	0	0	0	0	0.581395	2.32558	0.581395	0	0.581395	48.2558	0	19.7674	6.39535	0	0	0	0	0	0
M4S9	MF3	0	2.01005	0	0	3.01508	2.01005	26.1307	0	0.502513	0	0	0	1.00503	0	2.51256	0	0	1.00503	28.6432	0	29.1457	4.0201	0	0	0	0	0	0
M5S5	MF3	0	0.769231	0	0	0	0.769231	31.5385	5.38462	0	0	0	0	0	0	0	1.53846	0	0	43.8462	0	10.7692	1.53846	0	0	0	0	3.84615	0
M5S6	MF3	0	0.546448	0	0	0	1.63934	52.459	6.55738	0	0	0	0	0	0.546448	0	0.546448	0.546448	1.0929	26.2295	0	6.55738	0.546448	0.546448	0	0	1.63934	0.546448	0
M6S3	MF3	0.460829	0	0	0	0	0.921659	4.60829	0	0	0	0.921659	0	0.921659	0	0	0	0	4.60829	57.6037	0	17.0507	12.4424	0	0	0	0	0	0.460829
M6S5	MF3	0	0	0	0	0	0	10.1563	0	0	0	0	0	0	0.390625	0	1.17188	0	0	18.75	57.0312	8.98438	3.51563	0	0	0	0	0	0
M6S24	MF3	1.83486	0	0	0	0	0.917431	5.50459	0	0	0	0.917431	0	3.66972	0	1.83486	0	0	0	54.1284	0	24.7706	6.42202	0	0	0	0	0	0
M7S12	MF3	0	0	0	0	0	0	21.8579	0	0	0	0	0	0	0	1.63934	2.73224	1.0929	5.46448	48.6339	0	11.4754	4.91803	0	0	0	0	0	2.18579
M8S5	MF3	0	0	0	0	0	1.38889	1.38889	0	0	0	0	0	0	0	0	0	0	1.38889	30.5556	61.1111	0	1.38889	0	0	0	2.77778	0	0
M8S24	MF3	1.06383	0	0	0	4.78723	2.12766	22.8723	0	0	0	0	0	0	0	0	0.531915	0	1.06383	38.8298	17.5532	5.31915	5.85106	0	0	0	0	0	0
M8S25	MF3	0	0	0	0	1.44231	12.5	36.5385	0	0	0	0	0	0	0	0	0	0	0	37.9808	0	10.0962	0	0	0	0	0	1.44231	0
M8S26	MF3	0	0	0	0	1.76471	2.94118	23.5294	0	0	0	0	0	0	0	3.52941	1.76471	1.17647	0.588235	45.8824	0	15.8824	0.588235	0	0	0	0	2.35294	0
M8S34	MF3	0.636943	0	0	0	0	0.636943	3.82166	0	0	0	0	0	1.27389	0	0	0	0.636943	1.27389	53.5032	14.6497	1.27389	16.5605	0	0	0	5.73248	0	0
CANAL19-1	MF3	0	0	0	0	3.0303	2.27273	15.1515	0	0	0	0	0	0	0	3.78788	0	0	0	50.7576	0	20.4545	4.54545	0	0	0	0	0	0
	Min	0	0	0	0	0	0	1.38889	0	0	0	0	0	0	0	0	0	0	0	18.75	0	0	0	0	0	0	0	0	0
	Max	2.77778	2.77778	0	2.94118	4.78723	12.5	52.459	6.55738	1.06383	1.06383	1.06383	0	9.41176	2.94118	7.40741	10.7143	1.53846	5.46448	67.6923	61.1111	29.1457	16.5605	0.546448	0	0	5.73248	3.84615	2.18579
	Mean	0.322583	0.290643	0	0.175329	0.692245	1.8432	18.98	0.568666	0.0745877	0.112072	0.138234	0	1.08136	0.282911	1.88274	1.44894	0.411962	0.975413	43.882	9.79211	11.7186	4.09333	0.0260213	0	0	0.589643	0.491309	0.12603
samples	MF	Nummulites	Heterostegina	Spiroclypeus	Operculina	Lepidocyclinids	Amphistegina	Neorotalia	Risananeiza	Austrotrillina	Borelis	Peneroplis	Acervulina	Victoriellids	Planorbulinids	Rotaliids	Miliolids	Textulariids	Geniculate CA	CCA	Corals	Echinoderms	Bryozoans	Bivalves	Brachiopods	Barnacles	Serpulids	Quartz	Planktonics
M1S14	MF4	0	0	0	15.5963	32.1101	0.917431	0	0	0	0	0	0	0	0	0	0	2.75229	0	27.5229	0	0.917431	8.25688	0.917431	0	0	0	5.50459	5.50459
M1S15b	MF4	4.7619	0.952381	0	3.80952	4.7619	0	0	0	0	0	0	0	0	0	8.57143	0	0	0	51.4286	8.57143	6.66667	2.85714	0.952381	0	0	0	5.71429	0.952381
M1S16a	MF4	1.51515	0	0	7.57576	14.3939	5.30303	6.81818	0	0	0	0	0	0.757576	0	0	0	0	0	43.1818	0	4.54545	3.78788	0	0	0	0	10.6061	1.51515
M1S16b	MF4	0.653595	0	0	3.26797	11.1111	3.26797	15.6863	0	0	0	0	0	0.653595	0	11.1111	0	0	0	38.5621	0	2.61438	3.92157	0	0	0	0.653595	8.49673	0
M2S1	MF4	0	0	0	2.8169	9.15493	9.15493	11.2676	0	0	0	0	0	0	0	6.33803	0	0	0	54.2254	0	2.11268	0	0	0	0	0	4.92958	0
M2S2I	MF4	0	0	0	4.95868	8.26446	4.13223	19.0083	0	0	0	0	0	0	0	5.78512	0	0	0	48.7603	0	1.65289	0.826446	0	0	0	0	6.61157	0
M2S3	MF4	0	0	0	21.4815	11.1111	8.88889	3.7037	0	0	0	0	0	0	0	0	0	0	0	45.1852	0	4.44444	1.48148	0.740741	0	0	0	2.96296	0
M2S10	MF4	0.645161	0	0	18.7097	9.67742	7.74194	7.09677	0	0	0	0	0	0	0	3.22581	0	0	0	41.2903	0	4.51613	5.16129	0	0	0	0	1.93548	0
M2S12B	MF4	0	0	0	2.31214	10.4046	5.78035	6.93642	0	0	0	0	0	0	0.578035	3.46821	0	0	0	60.6936	1.15607	5.20231	1.15607	0	0	0	0	2.31214	0
M2S12C	MF4	0	0	0	0.666667	10.6667	0	4.66667	0	0	0	0	0	0	0	0.666667	0	0	0	70	0	3.33333	10	0	0	0	0	0	0
M2S13	MF4	0	0	0	3.9801	22.3881	2.48756	7.46269	0	0	0	0	0	1.49254	0	0	0	0	0	56.7164	0	1.49254	2.98507	0	0	0	0	0.995025	0
M3S3	MF4	0	0	0	1.97368	4.60526	7.23684	11.8421	0	0	0.657895	1.31579	0	3.94737	1.97368	3.28947	5.92105	0.657895	0.657895	39.4737	0	11.8421	1.31579	0	0	0	0	3.28947	0
M3S6	MF4	0	0	0	4.51128	1.50376	2.25564	12.782	0	0.75188	0	0	0	7.5188	0	4.51128	3.00752	3.7594	5.26316	36.8421	0	12.0301	0	0	0	0	0	5.26316	0
M3S13	MF4	0	1.35135	0	4.72973	4.05405	4.05405	10.8108	3.37838	0	0	0	0	0	0	2.02703	0.675676	0	0.675676	39.1892	13.5135	11.4865	3.37838	0	0	0	0.675676	0	0
M6S10	MF4	0	0	0	2.71318	10.8527	1.93798	1.55039	0	0	0	0.387597	0	0	0	1.16279	0	0.387597	0	58.9147	0	18.9922	1.16279	0	0	0	0	1.93798	0
M6S30	MF4	0	0	0	0	2.63158	5.26316	3.50877	0	0	0	0	0	0	0	0	0	0	0	81.1404	0	1.31579	0.877193	0.438596	0	0	0	4.82456	0
M8S35	MF4	2.05128	1.53846	0	4.61538	30.2564	6.15385	16.4103	0	0	0	0	0	0	0	0	0	0	0	29.7436	2.5641	4.10256	1.53846	0	0	0	0	1.02564	0
M8S43	MF4	1.01523	0	0	1.52284	14.2132	5.07614	4.56853	0	0	0	0	0	0	0	1.01523	0	0	0	54.3147	0	13.198	0.507614	1.01523	0	0	0.507614	3.04569	0
M8S54	MF4	0	0	0	2.86885	6.96721	6.55738	2.86885	0	0	0	0	0	0	0	0.409836	0	0	0	59.8361	0	19.2623	0.409836	0	0	0	0	0.819672	0
M8S55	MF4	0	0	0	3	38	2.5	3.5	0	0	0	0	0	0	0	0.5	0	0	0	48	0	4.5	0	0	0	0	0	0	0
M8S56	MF4	0	0	0	3.51563	16.0156	7.42188	5.85938	0	0	0	0	0	0	0	0	0	0	0	53.9063	0	7.8125	2.34375	0	0	0	0	3.125	0
M8S57a	MF4	0	0	0	2.7668	14.2292	3.16206	3.95257	0	0	0	0	0	0	0	0	0	0	0	60.8696	0	11.4625	1.18577	0	0	0	0	2.37154	0
M8S57b	MF4	0	0	0	3.71747	20.0743	6.69145	4.83271	0	0	0	0	0	0	0	0	0	0	0	43.8662	4.08922	13.7546	1.48699	0	0	0	0	1.48699	0
CANAL14-2	MF4	2.77778	0	0	5.09259	21.2963	1.38889	4.62963	0	0	0	0	0	0	0	0.925926	0	0	0	42.1296	0	9.25926	4.62963	5.09259	0	0	0	2.77778	0
CANAL16-1	MF4	3.82775	0	0	6.2201	8.13397	5.26316	8.13397	0	0	0	0	0	1.91388	0	2.87081	0	0	0.478469	33.4928	0	27.7512	1.91388	0	0	0	0	0	0
CANAL18-1	MF4	3.00429	0	0	3.86266	6.86695	3.00429	3.86266	0	0	0	0	0	0	0	1.28755	0	0	0	48.4979	0	22.7468	6.86695	0	0	0	0	0	0
marmo.5	MF4	0	0	0	0.462963	6.01852	1.85185	2.31481	0	0.462963	0	0	0	0	0	0	0.462963	0	0	82.4074	0	5.09259	0.925926	0	0	0	0	0	0
marmo.6	MF4	0	0	0	0	4.54545	1.13636	0.568182	0	0	0	0	0	0.568182	0	0	0	0	0	91.4773	0	0	0	0	0	0	0.568182	1.13636	0
	Min	0	0	0	0	1.50376	0	0	0	0	0	0	0	0	0	0	0	0	0	27.5229	0	0	0	0	0	0	0	0	0
	Max	4.7619	1.53846	0	21.4815	38	9.15493	19.0083	3.37838	0.75188	0.657895	1.31579	0	7.5188	1.97368	11.1111	5.92105	3.7594	5.26316	91.4773	13.5135	27.7512	10	5.09259	0	0	0.675676	10.6061	5.50459
	Mean	0.723291	0.137221	0	4.88387	12.6539	4.23676	6.59436	0.120656	0.0433872	0.0234962	0.0608352	0	0.601855	0.0911328	2.04165	0.359543	0.269899	0.252686	51.4881	1.06765	8.28954	2.46346	0.327035	0	0	0.0858952	2.89901	0.284719
samples	MF	Nummulites	Heterostegina	Spiroclypeus	Operculina	Lepidocyclinids	Amphistegina	Neorotalia	Risananeiza	Austrotrillina	Borelis	Peneroplis	Acervulina	Victoriellids	Planorbulinids	Rotaliids	Miliolids	Textulariids	Geniculate CA	CCA	Corals	Echinoderms	Bryozoans	Bivalves	Brachiopods	Barnacles	Serpulids	Quartz	Planktonics
M3S16	MF5	0	1.05263	0	0	2.10526	2.10526	6.31579	7.36842	0	0	1.05263	0	3.15789	1.05263	4.21053	7.36842	0	2.10526	36.8421	20	2.10526	2.10526	0	1.05263	0	0	0	0
M3S18	MF5	0	1.81818	0	0.909091	4.54545	0.909091	3.63636	3.63636	0.909091	0	0	0	0	0.909091	3.63636	6.36364	0.909091	1.81818	43.6364	12.7273	3.63636	7.27273	0	0	0	1.81818	0.909091	0
M4S3	MF5	0	0	0	1.8018	2.7027	2.7027	6.30631	22.5225	0.900901	0	0	0	0	1.8018	4.5045	6.30631	0	4.5045	24.3243	0.900901	9.00901	2.7027	0.900901	0	6.30631	0	0	1.8018
M4S17	MF5	0	3.09278	0	0	0	0	0	6.18557	1.03093	0	1.03093	0	0	1.03093	0	6.18557	1.03093	2.06186	60.8247	0	14.433	1.03093	1.03093	0	0	0	1.03093	0
M5S2	MF5	0	0	0	0	2.11268	0	0	7.04225	0	0	0	0	0	0	1.40845	2.11268	0	0	76.0563	4.92958	0	1.40845	0.704225	2.11268	0	0	2.11268	0
M5S3	MF5	0	0	0	0.826446	0.826446	1.65289	1.65289	2.47934	0	0	0	0	0	0	0	0	0	0	25.6198	0	35.5372	23.1405	2.47934	0	0	0	5.78512	0
M5S4a	MF5	0	0.719424	0	0	10.0719	2.8777	4.31655	9.35252	0	0	0	0	0	0	0	0.719424	0	0	44.6043	0	5.7554	16.5468	0.719424	0	0	0.719424	3.59712	0
M5S4b	MF5	0	0.980392	0	0	9.80392	0.980392	0	9.80392	0	0	0	0	0	0	0	3.92157	0	0	49.0196	0	5.88235	10.7843	1.96078	0	0	0	5.88235	0.980392
M5S7	MF5	0	5.10949	0	0	0	0	0	7.29927	0	0	0	0	0	0	0	1.45985	0	0	37.9562	27.7372	13.1387	5.83942	0	0	0	0	1.45985	0
M5S8	MF5	0	4.58716	3.66972	0	0	0.917431	1.83486	5.50459	1.83486	0	0	0	0	0	0	2.75229	0	0	51.3761	10.0917	12.844	0	1.83486	0	0	0	2.75229	0
M5S10	MF5	0	0	0	0	0	0.689655	2.75862	2.75862	1.37931	0	0	0	0	0	0	0.689655	0	0	57.2414	12.4138	10.3448	0	0.689655	0	0	11.0345	0	0
M5S11	MF5	0	3.67647	0	0	0	0	5.14706	8.08824	0	1.47059	0.735294	0	0	0	0	0	0	0.735294	52.2059	19.8529	7.35294	0	0.735294	0	0	0	0	0
M5S12	MF5	0	0	0	0	0	0	7.69231	11.5385	0	0	0	0	0	1.28205	0	1.28205	0	5.12821	39.7436	0	10.2564	1.28205	1.28205	0	0	0	20.5128	0
	Min	0	0	0	0	0	0	0	2.47934	0	0	0	0	0	0	0	0	0	0	24.3243	0	0	0	0	0	0	0	0	0
	Max	0	5.10949	3.66972	1.8018	10.0719	2.8777	7.69231	22.5225	1.83486	1.47059	1.05263	0	3.15789	1.8018	4.5045	7.36842	1.03093	5.12821	76.0563	27.7372	35.5372	23.1405	2.47934	2.11268	6.30631	11.0345	20.5128	1.8018
	Mean	0	1.61819	0.282287	0.272103	2.47449	0.987317	3.05083	7.9677	0.465776	0.113122	0.216835	0	0.242915	0.467423	1.05845	3.01242	0.149232	1.25795	46.1116	8.35796	10.0227	5.54716	0.949036	0.243485	0.4851	1.04401	3.38787	0.214015
samples	MF	Nummulites	Heterostegina	Spiroclypeus	Operculina	Lepidocyclinids	Amphistegina	Neorotalia	Risananeiza	Austrotrillina	Borelis	Peneroplis	Acervulina	Victoriellids	Planorbulinids	Rotaliids	Miliolids	Textulariids	Geniculate CA	CCA	Corals	Echinoderms	Bryozoans	Bivalves	Brachiopods	Barnacles	Serpulids	Quartz	Planktonics
M5S14	MF6	0	0	0	0	0	1.00503	0	0	0	0	0	0.502513	0	0	3.01508	0.502513	0.502513	1.00503	36.1809	0	4.52261	0.502513	2.01005	0	9.54774	0.502513	38.191	2.01005
M5S14bis	MF6	0	0	0	0	0	0.847458	0	0	0	0	0	7.62712	0	0	0.847458	0	1.27119	0.423729	82.2034	0	1.27119	0.423729	0	0	0	1.69492	3.38983	0
M5S15	MF6	0	0	0	0	0	2.57732	0	0	0	0	0	2.06186	0	0	2.57732	0	0	0.515464	53.6082	0	4.63918	2.57732	4.63918	0	1.03093	1.54639	22.6804	1.54639
	Min	0	0	0	0	0	0.847458	0	0	0	0	0	0.502513	0	0	0.847458	0	0	0.423729	36.1809	0	1.27119	0.423729	0	0	0	0.502513	3.38983	0
	Max	0	0	0	0	0	2.57732	0	0	0	0	0	7.62712	0	0	3.01508	0.502513	1.27119	1.00503	82.2034	0	4.63918	2.57732	4.63918	0	9.54774	1.69492	38.191	2.01005
	Mean	0	0	0	0	0	1.4766	0	0	0	0	0	3.39716	0	0	2.14662	0.167504	0.591233	0.648073	57.3308	0	3.47766	1.16785	2.21641	0	3.52622	1.24794	21.4204	1.18548

## Sheet: table
		de medias all con facies Cluster Ultimo Bray-Curtis							MF: NAMED BY STRATIGRAPHIC ORDER																								hacer tabla solo con componentes relevantes para diferenciación facies +CCA, CORALS?								tabla con all ->para descripcion comp facies
		components in each microfacies (mean-min-max)
																																									tabla con relevant -> analisis
	Microfacies	r. a. (%)	Larger Benthic Foraminifera														Smaller benthic foraminifera			Corallines		Other components								Planktonics
			Nummulites	Heterostegina	Spiroclypeus	Operculina	Lepidocyclinids	Amphistegina	Neorotalia	Risananeiza	Austrotrillina	Borelis	Peneroplis	Acervulina	Victoriellids	Planorbulinids	Rotaliids	Miliolids	Textulariids	CA Geniculates	CCA	Corals	Echinoderms	Bryozoans	Bivalves	Brachiopods	Barnacles	Serpulids	Quartz
	MF1	Min.	0	0	0	0	0	0	0	0	0	0	0	0	0	0	0	0	0	0	0	0	3.90625	0	0	0	0	0	0	26.9461
Plankt		Max.	3.90625	0	0	2.43902	0	7.31707	2.43902	0	0	0	0	0.598802	3.65854	0	3.27869	1.1976	0.78125	3.125	52.0325	2.39521	12.963	13.2813	0	0	0	1.1976	0	87.037
		Mean	1.7598	0	0	0.406504	0	1.45481	0.935914	0	0	0	0	0.0998004	1.13059	0	1.52171	0.199601	0.130208	1.19691	30.7724	0.399202	7.91663	3.4221	0	0	0	0.199601	0	48.4542
	MF2	Min.	1.3986	0	0	0	0	0	0	0	0	0	0	0	0	0	0	0	0	0	17.5676	0	0	0	0	0	0	0	0	0
Numm		Max.	31.2057	3.9604	0	1.38889	2.12766	6.89655	10.2857	0	0	1.53846	0.70922	3.0303	6.74157	0.44843	4.09836	3.07692	0.769231	3.93258	78.6164	65.035	17.9348	23.4177	3.46535	1.68539	0.769231	10.5882	0	2.55102
		Mean	10.1811	0.353519	0	0.0926793	0.0707412	1.81516	2.33029	0	0	0.0509396	0.0232086	0.150422	1.12996	0.00846095	0.198089	0.445415	0.0381578	0.84258	44.0797	23.1067	5.81585	7.82661	0.295808	0.0870681	0.0145138	0.856755	0	0.186197
	MF3	Min.	0	0	0	0	0	0	1.38889	0	0	0	0	0	0	0	0	0	0	0	18.75	0	0	0	0	0	0	0	0	0
Neor		Max.	2.77778	2.77778	0	2.94118	4.78723	12.5	52.459	6.55738	1.06383	1.06383	1.06383	0	9.41176	2.94118	7.40741	10.7143	1.53846	5.46448	67.6923	61.1111	29.1457	16.5605	0.546448	0	0	5.73248	3.84615	2.18579
		Mean	0.322583	0.290643	0	0.175329	0.692245	1.8432	18.98	0.568666	0.0745877	0.112072	0.138234	0	1.08136	0.282911	1.88274	1.44894	0.411962	0.975413	43.882	9.79211	11.7186	4.09333	0.0260213	0	0	0.589643	0.491309	0.12603
	MF4	Min.	0	0	0	0	1.50376	0	0	0	0	0	0	0	0	0	0	0	0	0	27.5229	0	0	0	0	0	0	0	0	0
Lepidos		Max.	4.7619	1.53846	0	21.4815	38	9.15493	19.0083	3.37838	0.75188	0.657895	1.31579	0	7.5188	1.97368	11.1111	5.92105	3.7594	5.26316	91.4773	13.5135	27.7512	10	5.09259	0	0	0.675676	10.6061	5.50459
		Mean	0.723291	0.137221	0	4.88387	12.6539	4.23676	6.59436	0.120656	0.0433872	0.0234962	0.0608352	0	0.601855	0.0911328	2.04165	0.359543	0.269899	0.252686	51.4881	1.06765	8.28954	2.46346	0.327035	0	0	0.0858952	2.89901	0.284719
	MF5	Min.	0	0	0	0	0	0	0	2.47934	0	0	0	0	0	0	0	0	0	0	24.3243	0	0	0	0	0	0	0	0	0
Risana		Max.	0	5.10949	3.66972	1.8018	10.0719	2.8777	7.69231	22.5225	1.83486	1.47059	1.05263	0	3.15789	1.8018	4.5045	7.36842	1.03093	5.12821	76.0563	27.7372	35.5372	23.1405	2.47934	2.11268	6.30631	11.0345	20.5128	1.8018
		Mean	0	1.61819	0.282287	0.272103	2.47449	0.987317	3.05083	7.9677	0.465776	0.113122	0.216835	0	0.242915	0.467423	1.05845	3.01242	0.149232	1.25795	46.1116	8.35796	10.0227	5.54716	0.949036	0.243485	0.4851	1.04401	3.38787	0.214015
	MF6	Min.	0	0	0	0	0	0.847458	0	0	0	0	0	0.502513	0	0	0.847458	0	0	0.423729	36.1809	0	1.27119	0.423729	0	0	0	0.502513	3.38983	0
Bioclastics+Q		Max.	0	0	0	0	0	2.57732	0	0	0	0	0	7.62712	0	0	3.01508	0.502513	1.27119	1.00503	82.2034	0	4.63918	2.57732	4.63918	0	9.54774	1.69492	38.191	2.01005
		Mean	0	0	0	0	0	1.4766	0	0	0	0	0	3.39716	0	0	2.14662	0.167504	0.591233	0.648073	57.3308	0	3.47766	1.16785	2.21641	0	3.52622	1.24794	21.4204	1.18548

## Sheet: texture
	facies según Cluster Ultimo Bray-Curtis
	MF	matrix	cement
	M1S1'	49.6377	3.26087			sample	FACIES	micrite	cement
	M1S2	48.5714	4.28571			M1S7	MF1	45	11.3333
	M1S3	30.8725	4.36242			M6S2	MF1	78.9063	0
	M1S4	16.7785	7.04698			M7S16	MF1	53.0822	0.684932
	M1S5 I	39.2491	3.07167			M8S15	MF1	38.9831	2.37288
	M1S6	37.3737	2.0202			M8S29	MF1	29.2517	8.16327
	M1S7	45	11.3333			marmo2	MF1	48.9583	7.63889
	M1S10	49.8305	1.35593				Min	29.2517	0
	M1S11	38.7205	4.3771				Max	78.9063	11.3333
	M1S14	55.2083	0.694444				Mean	49.0303	5.03222
	M1S15b	60.3509	2.80702
	M1S16a	49.8305	1.35593			sample	FACIES	micrite	cement
	M1S16b	46.1538	2.67559			M1S1'	MF2	49.6377	3.26087
	M2S1	49.6575	1.71233			M1S2	MF2	48.5714	4.28571
	M2S2I	57.5758	1.6835			M1S3	MF2	30.8725	4.36242
	M2S3	50.1718	1.03093			M1S4	MF2	16.7785	7.04698
	M2S10	47.2973	0.337838			M1S5 I	MF2	39.2491	3.07167
	M2S12B	39.5973	2.34899			M1S6	MF2	37.3737	2.0202
	M2S12C	47.619	1.36054			M1S11	MF2	38.7205	4.3771
	M2S13	29.1946	3.3557			M6S1	MF2	58.7189	4.27046
	M3S2	23.2082	19.4539			M6S6	MF2	33.7793	3.34448
	M3S3	31.3131	17.5084			M6S7	MF2	38.0952	0.680272
	M3S4	31.8644	10.5085			M6S8	MF2	34.2282	2.68456
	M3S5	35.6902	18.8552			M6S9	MF2	17.0068	2.38095
	M3S6	50	5.36913			M6S12	MF2	42.9553	1.03093
	M3S10	23.7288	12.2034			M6S13	MF2	47.3154	1.67785
	M3S11	4.69799	2.01342			M6S14	MF2	43.5811	2.36486
	M3S12	27.931	25.8621			M6S16	MF2	37.5	14.1892
	M3S13	44	3			M6S17	MF2	24.6528	22.5694
	M3S14-I	9	0			M6S18	MF2	25.4296	6.18557
	M3S15	21.1073	45.3287			M6S23	MF2	25.0883	1.06007
	M3S16	37.0748	28.2313			M6S27	MF2	56.4189	1.68919
	M3S17	8.33333	6.33333			M6S28	MF2	43.2526	1.03806
	M3S18	27.8351	30.2405			M7S11	MF2	29.2096	1.37457
	M4S1	44.5205	9.58904			M7S13	MF2	38.6441	7.79661
	M4S3	35.7388	20.6186			M7S15	MF2	27.4306	4.86111
	M4S7	15.5405	14.1892			M7S18	MF2	39.1753	4.46735
	M4S8	27.9863	10.5802			M7S19	MF2	26.7559	4.68227
	M4S9	22.3333	7			M7S21	MF2	48.1481	3.0303
	M4S17	19.9324	40.5405			M7S22	MF2	56.5657	4.0404
	M5S2	34	14.6667			M7S23	MF2	50	0.352113
	M5S3	53.8721	1.0101			M8S1	MF2	3.40136	20.7483
	M5S4a	28.3333	22			M8S2	MF2	22.8571	0.714286
	M5S4b	62.3333	2			M8S3	MF2	26.5455	3.63636
	M5S5	26.1017	29.1525			M8S4	MF2	32.9825	2.45614
	M5S6	18.1818	16.835			M8S6	MF2	37.8947	1.05263
	M5S7	18.3333	34.6667			M8S7	MF2	49.4845	5.15464
	M5S8	14.6667	48			M8S8	MF2	37.0242	0
	M5S10	22.3333	29			M8S9	MF2	33.3333	2.08333
	M5S11	12.3746	41.4716			M8S10	MF2	31.7241	2.06897
	M5S12	45.0172	30.5842			M8S11	MF2	37.037	0.3367
	M5S14	24.6667	3.66667			M8S12	MF2	38.3838	3.0303
	M5S14bis	12.709	4.34783			M8S16	MF2	24.2215	0
	M5S15	26.7797	1.69492			M8S17	MF2	35.3952	2.4055
	M6S1	58.7189	4.27046			M8S18	MF2	28.4211	2.10526
	M6S2	78.9063	0			M8S20	MF2	50.8591	0
	M6S3	15.2542	6.10169			M8S22	MF2	25.3425	0
	M6S4	56.1224	4.42177			M8S23	MF2	49.0975	1.44404
	M6S5	5.01672	8.69565			M8S30	MF2	45.1178	10.101
	M6S6	33.7793	3.34448			M8S31	MF2	70.8904	5.13699
	M6S7	38.0952	0.680272			M8S32	MF2	24.3986	3.09278
	M6S8	34.2282	2.68456			M8S33b	MF2	41.3194	1.04167
	M6S9	17.0068	2.38095			marmo1	MF2	29.1525	5.08475
	M6S10	5	4.33333			marmo3	MF2	29.4737	6.31579
	M6S11	35.1171	2.00669			marmo.2	MF2	28.7625	9.0301
	M6S12	42.9553	1.03093				Min	3.40136	0
	M6S13	47.3154	1.67785				Max	70.8904	22.5694
	M6S14	43.5811	2.36486				Mean	36.5712	3.98557
	M6S15	2.34114	54.5151
	M6S16	37.5	14.1892			sample	FACIES	micrite	cement
	M6S17	24.6528	22.5694			M1S10	MF3	49.8305	1.35593
	M6S18	25.4296	6.18557			M3S2	MF3	23.2082	19.4539
	M6S19	0.3367	7.07071			M3S4	MF3	31.8644	10.5085
	M6S20	1.69492	9.49153			M3S5	MF3	35.6902	18.8552
	M6S23	25.0883	1.06007			M3S12	MF3	27.931	25.8621
	M6S24	57.732	1.37457			M3S15	MF3	21.1073	45.3287
	M6S25	66.782	2.42215			M4S7	MF3	15.5405	14.1892
	M6S26	15.3584	0			M4S8	MF3	27.9863	10.5802
	M6S27	56.4189	1.68919			M4S9	MF3	22.3333	7
	M6S28	43.2526	1.03806			M5S5	MF3	26.1017	29.1525
	M6S30	16.5541	1.68919			M5S6	MF3	18.1818	16.835
	M7S1	48.7455	0			M6S3	MF3	15.2542	6.10169
	M7S2	24.9123	4.5614			M6S5	MF3	5.01672	8.69565
	M7S3	17.3469	0.680272			M6S24	MF3	57.732	1.37457
	M7S4	67.128	4.15225			M7S12	MF3	25.1678	12.4161
	M7S5	44.1077	5.05051			M8S5	MF3	21.2121	6.06061
	M7S6	34.0067	1.0101			M8S24	MF3	30.1003	5.68562
	M7S7	49.8316	9.09091			M8S25	MF3	16.7224	11.7057
	M7S9	24.9123	8.42105			M8S26	MF3	6.10169	35.5932
	M7S10	37.4126	2.0979			M8S34	MF3	43.3447	2.04778
	M7S11	29.2096	1.37457			CANAL19-1	MF3	41.6107	12.7517
	M7S12	25.1678	12.4161				Min	5.01672	1.35593
	M7S13	38.6441	7.79661				Max	57.732	45.3287
	M7S14	0	0				Mean	26.7637	14.3597
	M7S15	27.4306	4.86111
	M7S16	53.0822	0.684932			sample	FACIES	micrite	cement
	M7S17	3.66667	2.66667			M1S14	MF4	55.2083	0.694444
	M7S18	39.1753	4.46735			M1S15b	MF4	60.3509	2.80702
	M7S19	26.7559	4.68227			M1S16a	MF4	49.8305	1.35593
	M7S21	48.1481	3.0303			M1S16b	MF4	46.1538	2.67559
	M7S22	56.5657	4.0404			M2S1	MF4	49.6575	1.71233
	M7S23	50	0.352113			M2S2I	MF4	57.5758	1.6835
	M8S1	3.40136	20.7483			M2S3	MF4	50.1718	1.03093
	M8S2	22.8571	0.714286			M2S10	MF4	47.2973	0.337838
	M8S3	26.5455	3.63636			M2S12B	MF4	39.5973	2.34899
	M8S4	32.9825	2.45614			M2S12C	MF4	47.619	1.36054
	M8S5	21.2121	6.06061			M2S13	MF4	29.1946	3.3557
	M8S6	37.8947	1.05263			M3S3	MF4	31.3131	17.5084
	M8S7	49.4845	5.15464			M3S6	MF4	50	5.36913
	M8S8	37.0242	0			M3S13	MF4	44	3
	M8S9	33.3333	2.08333			M6S10	MF4	5	4.33333
	M8S10	31.7241	2.06897			M6S30	MF4	16.5541	1.68919
	M8S11	37.037	0.3367			M8S35	MF4	31.2081	1.34228
	M8S12	38.3838	3.0303			M8S43	MF4	27.3038	1.02389
	M8S15	38.9831	2.37288			M8S54	MF4	12.0805	2.01342
	M8S16	24.2215	0			M8S55	MF4	4.01338	21.4047
	M8S17	35.3952	2.4055			M8S56	MF4	7.69231	4.34783
	M8S18	28.4211	2.10526			M8S57a	MF4	6.22837	4.15225
	M8S20	50.8591	0			M8S57b	MF4	4.09556	1.02389
	M8S22	25.3425	0			CANAL14-2	MF4	25.2525	1.3468
	M8S23	49.0975	1.44404			CANAL16-1	MF4	21.0169	3.72881
	M8S24	30.1003	5.68562			CANAL18-1	MF4	16.0535	3.34448
	M8S25	16.7224	11.7057			marmo.5	MF4	20.7018	1.75439
	M8S26	6.10169	35.5932			marmo.6	MF4	34.1637	1.77936
	M8S29	29.2517	8.16327				Min	4.01338	0.337838
	M8S30	45.1178	10.101				Max	60.3509	21.4047
	M8S31	70.8904	5.13699				Mean	31.7619	3.51875
	M8S32	24.3986	3.09278
	M8S33b	41.3194	1.04167			sample	FACIES	micrite	cement
	M8S34	43.3447	2.04778			M3S16	MF5	37.0748	28.2313
	M8S35	31.2081	1.34228			M3S18	MF5	27.8351	30.2405
	M8S43	27.3038	1.02389			M4S3	MF5	35.7388	20.6186
	M8S54	12.0805	2.01342			M4S17	MF5	19.9324	40.5405
	M8S55	4.01338	21.4047			M5S2	MF5	34	14.6667
	M8S56	7.69231	4.34783			M5S3	MF5	53.8721	1.0101
	M8S57a	6.22837	4.15225			M5S4a	MF5	28.3333	22
	M8S57b	4.09556	1.02389			M5S4b	MF5	62.3333	2
	CANAL14-2	25.2525	1.3468			M5S7	MF5	18.3333	34.6667
	CANAL16-1	21.0169	3.72881			M5S8	MF5	14.6667	48
	CANAL18-1	16.0535	3.34448			M5S10	MF5	22.3333	29
	CANAL19-1	41.6107	12.7517			M5S11	MF5	12.3746	41.4716
	marmo1	29.1525	5.08475			M5S12	MF5	45.0172	30.5842
	marmo2	48.9583	7.63889				Min	12.3746	1.0101
	marmo3	29.4737	6.31579				Max	62.3333	48
	marmo.2	28.7625	9.0301				Mean	31.6804	26.3869
	marmo.5	20.7018	1.75439
	marmo.6	34.1637	1.77936			sample	FACIES	micrite	cement
						M5S14	MF6	24.6667	3.66667
						M5S14bis	MF6	12.709	4.34783
						M5S15	MF6	26.7797	1.69492
							Min	12.709	1.69492
							Max	26.7797	4.34783
							Mean	21.3851	3.23647
