# Supplementary material for: Chronostratigraphic ranges of Early–Middle Miocene larger benthic foraminifera calibrated by planktonic foraminiferal assemblages (Sierra de Marmolance, Granada, SE Spain)
Source: Copernicus journal article supplement (doi:10.5194/jm-44-573-2025), 2025-11-25
Supplement: Supplementary file [file jm-44-573-2025-supplement-title-page.pdf › jm-44-573-2025-supplement-title-page.pdf]

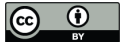

## *Supplement of*

# **Chronostratigraphic ranges of Early–Middle Miocene larger benthic foraminifera calibrated by planktonic foraminiferal assemblages (Sierra de Marmolance, Granada, SE Spain)**

**Mónica Bolívar-Feriché et al.**

*Correspondence to:* Davide Bassi ([bsd@unife.it](mailto:bsd@unife.it))

- [jm-44-573-2025-supplement-title-page.pdf](#)
- ANOVA-comp-cluster
  - [Neorotalia-MW.png](#)
  - [Neorotalia-stat.png](#)
  - [Risananeiza-MW.png](#)
  - [Risananeiza-stat.png](#)
  - [acervulina-MW.png](#)
  - [acervulina-stat.png](#)
  - [austrotrillina-MW.png](#)
  - [austrotrillina-stat.png](#)
  - [discocyclina-MW.png](#)
  - [discocyclina-stat.png](#)
  - [heterostegina-MW.png](#)
  - [heterostegina-stat.png](#)
  - [lepidos-MW.png](#)
  - [lepidos-stat.png](#)
  - [nummulites-MW.png](#)
  - [nummulites-stat.png](#)
  - [operculina-MW.png](#)
  - [operculina-stat.png](#)
  - [planktonics-MW.png](#)
  - [planktonics-stat.png](#)
  - [terrigenous-MW.png](#)
  - [terrigenous-stat.png](#)

- Marmolance\_Cluster-Bray-Curtis.jpg
- Supplements\_explanation.docx
- Table S1\_all-components\_suppl data.pdf
- Table S2\_DATA-STATISTICS.xlsx

The copyright of individual parts of the supplement might differ from the article licence.
